# Supplementary material for: GWAS of peptic ulcer disease implicates Helicobacter pylori infection, other gastrointestinal disorders and depression
Source: PubMed Central journal article supplement (PMC7895976; doi:10.1038/s41467-021-21280-7), 2021-02-19
Supplement: 41467_2021_21280_MOESM1_ESM.pdf [file 41467_2021_21280_MOESM1_ESM.pdf]

***SUPPLEMENTARY NOTE, TABLES & FIGURES***  
***GWAS of peptic ulcer disease implicates Helicobacter pylori infection, other  
gastrointestinal disorders and depression***

Yeda Wu\*, Graham K. Murray, Enda M. Byrne, Julia Sidorenko, Peter M. Visscher, Naomi R. Wray\*

\* Correspondence should be addressed to Y.W. ([yeda.wu@uq.edu.au](mailto:yeda.wu@uq.edu.au)) N.R.W. ([naomi.wray@uq.edu.au](mailto:naomi.wray@uq.edu.au))

## Table of Contents

|                                    |           |
|------------------------------------|-----------|
| <b>Supplementary Notes</b> .....   | <b>4</b>  |
| Supplementary Note 1 .....         | 4         |
| Supplementary Note 2 .....         | 4         |
| Supplementary Note 3 .....         | 4         |
| Supplementary Note 4 .....         | 5         |
| Supplementary Note 5 .....         | 5         |
| <b>Supplementary Tables</b> .....  | <b>7</b>  |
| Supplementary Table 1 .....        | 7         |
| Supplementary Table 2 .....        | 8         |
| Supplementary Table 3 .....        | 10        |
| Supplementary Table 4 .....        | 11        |
| Supplementary Table 5 .....        | 13        |
| Supplementary Table 6 .....        | 14        |
| Supplementary Table 7 .....        | 15        |
| Supplementary Table 8 .....        | 16        |
| Supplementary Table 9 .....        | 17        |
| Supplementary Table 10 .....       | 19        |
| Supplementary Table 11 .....       | 21        |
| Supplementary Table 12 .....       | 23        |
| Supplementary Table 13 .....       | 24        |
| Supplementary Table 14 .....       | 25        |
| Supplementary Table 15 .....       | 26        |
| Supplementary Table 16 .....       | 28        |
| Supplementary Table 17 .....       | 29        |
| Supplementary Table 18 .....       | 30        |
| Supplementary Table 19 .....       | 31        |
| Supplementary Table 20 .....       | 32        |
| Supplementary Table 21 .....       | 33        |
| Supplementary Table 22 .....       | 34        |
| Supplementary Table 23 .....       | 35        |
| Supplementary Table 24 .....       | 36        |
| Supplementary Table 25 .....       | 37        |
| Supplementary Table 26 .....       | 38        |
| Supplementary Table 27 .....       | 39        |
| Supplementary Table 28 .....       | 40        |
| Supplementary Table 29 .....       | 41        |
| <b>Supplementary Figures</b> ..... | <b>42</b> |
| Supplementary Fig. 1 .....         | 42        |
| Supplementary Fig. 2 .....         | 43        |
| Supplementary Fig. 3 .....         | 44        |
| Supplementary Fig. 4 .....         | 45        |
| Supplementary Fig. 5 .....         | 46        |
| Supplementary Fig. 6 .....         | 47        |
| Supplementary Fig. 7 .....         | 50        |
| Supplementary Fig. 8 .....         | 51        |
| Supplementary Fig. 9 .....         | 55        |
| Supplementary Fig. 10 .....        | 57        |
| Supplementary Fig. 11 .....        | 59        |
| Supplementary Fig. 12 .....        | 60        |

|                             |           |
|-----------------------------|-----------|
| Supplementary Fig. 13 ..... | 61        |
| Supplementary Fig. 14 ..... | 62        |
| Supplementary Fig. 15 ..... | 63        |
| Supplementary Fig. 16 ..... | 64        |
| <b>References .....</b>     | <b>65</b> |

## Supplementary Note

### **Supplementary Note 1: Detailed instruction for Panel b and c of Fig. 1.**

**Panel b explanation.** Cells represent the ratio of the odds of being a disease case for the column disease in those from each row and the odds of each row disease cases in unrelated European-ancestry individuals. For example, the odds of person in the UKB with a GORD phenotype is 12 fold higher in those with PUD, compared to those without PUD. However, GORD is more common than PUD (11.7% vs. 3.5%) and so the odds of PUD is less common than in those without GORD, odds 0.77. **Panel c explanation.** Taking PUD as an example index disease. There are 7,545 PUD cases without any comorbidity for GORD, IBS and IBD. Among the GORD, IBS and PUD cases, we first removed individuals with at least two of the three diseases, e.g., there are 34,729 individuals who have a GORD diagnosis and not IBS or IBD, amongst whom 3,124 individuals also have a PUD diagnosis. Similarly, there are 16,337 individuals who have a IBS diagnosis but not GORD or IBD, amongst whom 743 individuals also have a PUD diagnosis. Lastly, and there are 3,839 individuals who have an IBD diagnosis but not GORD or IBS, among whom 201 individuals also have a PUD diagnoses. We then used a two proportion Z test to test which disease is more prone to be comorbid with PUD by comparing the proportion in pairs (i.e., 3124/34729, 743/16337, 201/3839).

### **Supplementary Note 2: Discussion of SNP-based heritability and genetic correlation of subgroup phenotypes for each of PUD, GORD and IBS.**

A previous study reported rs10512344 to be the only SNP associated at the level of genome-wide significance (reported  $P = 3.6E-8$ ) in females with IBS using UKB self-reported illness (Data Field: 20003) data<sup>1</sup>. However, the  $P$  value for this SNP in our analyses is  $5.0E-5$  ( $4.4E-7$  in females, **Supplementary Fig. 10b**). Given that they used a self-report phenotype while we used a combination of self-reported, hospital admission and primary care diseases diagnoses, we conducted a sensitivity analysis. We first removed individuals with diagnosis records from at least two resources and identified individuals with a diagnosis record from only one resource. For each of the IBS, PUD and GORD, We then regenerated three subgroup phenotypes using cases from one-resource diagnosis record and controls from the original phenotype (**Supplementary Fig. 10a**). We conducted GWAS analyses (**Methods**) and investigated the summary statistics for rs10512344 among the GWAS analyses of the original IBS phenotype and the three IBS subgroup phenotypes (**Supplementary Fig. 10b**). We also investigated the SNP-based heritability and genetic correlation among the three subgroup phenotypes for each of the IBS, PUD and GORD (**Supplementary Fig. 10c-d** and **Supplementary Table 8-9**). Results showed that the three subgroup phenotypes for each of IBS, PUD and GORD are highly genetically correlated with each other (**Supplementary Fig. 10d** and **Supplementary Table 9**) (and from simulation and theory this overlap is not a reflection of the use of shared controls<sup>2</sup>). Our results do not support a robust association of rs10512344 with IBS.

### **Supplementary Note 3: Sensitivity analysis for SNP-based heritability and genetic correlation analyses.**

As a sensitivity analysis, SNP-based heritability ( $h_{SNP}^2$ ) and genetic correlation ( $r_g$ ) analyses were conducted for PUD, GORD, IBS and IBD using the phenotypes generated after excluding individuals with more than one of the four gastrointestinal (GI) disorders (defined as sensitivity analysis phenotypes). The number of overlapped individuals for PUD, GORD, IBS and IBD case are in **Supplementary Fig. 9a**. As expected, the  $h_{SNP}^2$  estimates on the observed scale for these disorders were lower due to the excluded individuals from the cases of original phenotypes but still significantly different from zero (**Supplementary Fig. 9b**); conversion to liability scale is difficult after case exclusion as it contravenes underlying assumptions of the transformation. We then calculated the  $r_g$  within sensitivity analysis phenotypes, between sensitivity analysis phenotypes with traits from LD Hub and nine psychiatric and neurologic diseases from published studies (**Supplementary Fig. 9c**) (genetic correlations are robust to case/control ascertainment strategies<sup>2</sup>). The  $r_g$  within sensitivity analysis phenotypes showed high  $r_g$  among PUD, GORD, IBS and all low non-statistically significant  $r_g$  with IBD. The  $r_g$  between GORD and PUD is 0.38 (SE = 0.08,  $P = 3.6E-6$ ) and the  $r_g$  between GORD and IBS is 0.47 (SE = 0.08,  $P = 3.4E-10$ ), which are lower to the original results. The  $r_g$  between PUD and IBS is 0.25 (SE = 0.12,  $P = 0.034$ ), of which the original  $r_g$  is 0.49 (SE = 0.08,  $P = 2.0E-10$ ). As shown in **Supplementary Fig. 9d**, the number of overlapped individuals for PUD and IBS is 1,740, however, we over-removed 4,751 individuals for PUD and



6,323 individuals for IBS due to the overlap with the other two GI disorders (GORD and IBD, shown in **Supplementary Fig. 9a**). The number of total PUD and IBS cases is 16,666 and 29,524 and these over-removed individuals occupy ~1/4 for PUD cases and ~1/5 for IBS cases, resulting in reducing power to estimate the  $r_g$ . Thus we only removed the only 1,740 overlapped individuals for PUD and IBS and re-calculated the  $r_g$  between PUD and IBS, as shown in **Supplementary Fig. 9e**. The  $r_g$  is 0.33 (SE = 0.09, P = 3.0E-4). PUD, GORD and IBS sensitivity analyses phenotypes showed statistically significantly  $r_g$  with depressive symptoms while there is no statistically significant  $r_g$  between IBD and depressive symptoms. The  $h_{SNP}^2$  for sensitivity analyses phenotypes are in **Supplementary Table 6**. The  $r_g$  within sensitivity analysis phenotypes and between sensitivity analysis phenotypes and traits from the nine published psychiatric and neurologic studies are in **Supplementary Table 7** and **11**. The  $r_g$  between sensitivity analysis phenotypes with traits from LD Hub are in **Supplementary Data 4**.

#### **Supplementary Note 4: Sensitivity analysis for Mendelian Randomization between major depression and PG<sub>+</sub>M.**

Given the statistically significant results between MD and PG<sub>+</sub>M from bidirectional GSMR analyses, we also conducted bidirectional MR analyses between MD and PG<sub>+</sub>M using the TwoSampleMR package (<https://github.com/MRCIEU/TwoSampleMR>). For each of MD and PG<sub>+</sub>M GWAS summary statistics, we first generated the independent loci using PLINK(v1.90b)<sup>3</sup> (--clump-p1 5.0E-8 --clump-p2 5.0E-8 --clump-r2 0.01 --clump-kb 1000) and the genotype data (8,545,065 SNPs with MAF > 0.01) of 20,000 randomly sampled unrelated European individuals from UKB as a LD reference. Only the most significant SNP across the MHC region was retained. For each of the genetic instruments (i.e., SNPs), we extracted the allele, effect size, standard error and P value from the exposure GWAS summary statistics. We also extracted the corresponding information from the outcome GWAS summary statistics for these genetic instruments. If a SNP was unavailable in the outcome GWAS summary statistics, we identified proxy SNP with a minimum LD  $r^2 = 0.7$ . For each direction of potential influence, we combined MR estimates using inverse variance-weighted (IVW)<sup>4</sup> analysis, which essentially translates to a weighted regression of SNP-outcome effects on SNP-exposure effects where the intercept is constrained to zero. The IVW method will return an unbiased estimate if there is no or balanced horizontal pleiotropy. To account for this, we compared results from IVW method with results from MR Egger<sup>5</sup> and weighted median method<sup>6</sup>, from which the estimates are known to be relatively robust to horizontal pleiotropy, though at the cost of reduced statistical power. To assess robustness of significant results, we also conducted the MR Egger intercept test for horizontal pleiotropy. We also applied MR-PRESSO<sup>7</sup> (Pleiotropy Residual Sum and Outlier) to detect and correct for any outliers reflecting likely pleiotropic biases for all reported results. The IVW results showed bidirectionally statistically significant results, of which the pattern is similar as the GSMR results (**Supplementary Fig. 15**). The MR-Egger intercept test showed no statistical significance, suggesting that there is no horizontal pleiotropy (**Supplementary Table 22**). There is no outliers being removed after MR-PRESSO analyses. LCV method<sup>8</sup> is designed to separate confounders from causality and hence is more likely to differ from MR where there is a unidirectional MR result. We used the LCV method to explore the relationship between MD and PG<sub>+</sub>M, following the instructions from <https://github.com/lukejoconnor/LCV>. Briefly, we used the munged file from LDSC for MD and PG<sub>+</sub>M, together with the provided LD score from 1000 Genomes Europeans data (eur\_w\_ld\_chr, MHC region removed), as input. After selecting SNPs with MAF > 0.05 and sorted the SNPs from GWAS summary statistics by genomic region, the RunLCV() function was used for analysis. As expected, the genetic causality proportion is not significant for PG<sub>+</sub>M and MD because of the strong bidirectional significance (**Supplementary Table 24**).

#### **Supplementary Note 5: Sensitivity analysis for Mendelian Randomization between major depression and depression-removed sensitivity GI phenotypes.**

As sensitivity analyses, we removed the depression cases (the combined cases from the UKB eight depression phenotypes) from the five GI disorder phenotypes (defined as GI-DepComRMV phenotypes) and conducted GWAS analyses. We repeated LDSC genetic correlation and MR analyses between major depression and these five GI-DepComRMV phenotypes. All genetic correlation results retained a pattern that did not change our interpretation of the original results (**Supplementary Table 25**). The MR results showed similar pattern results for four GI-DepComRMV phenotypes (GORD, PG<sub>+</sub>M, IBS and IBD), although the major depression and PUD-DepComRMV became non-significant (**Supplementary Table 26**). These analyses removed a very high number of cases and controls based on the combined eight depression phenotype cases from PUD and hence the magnitude of the standard errors of the estimates from these sensitivity analyses were large. To gain further insight, we regenerated eight PUD sensitivity phenotypes after removing the cases of each of the eight

depression phenotypes from PUD in turn and repeated MR analyses. The MR results were significant for seven of them, as shown in **Supplementary Table 27**. The MR result were non-significant when cases and controls were removed based on the GPsy-seen a GP for nerves, anxiety, tension or depression in which only 59% of cases and 65% of controls were retained for analysis.

## **Supplementary Tables**

Supplementary Table 1. Case definition and number of cases for each phenotype in UK Biobank.

| Phenotypes              | UKB data field | UKB data field description                                     | UKB data coding for case definition                                                                                                                                                                                                                                                        | Number of cases |                                                                      |
|-------------------------|----------------|----------------------------------------------------------------|--------------------------------------------------------------------------------------------------------------------------------------------------------------------------------------------------------------------------------------------------------------------------------------------|-----------------|----------------------------------------------------------------------|
| PUD                     | 131591         | Source of report of K25 (gastric ulcer)                        | 20: Death register only<br>21: Death register and other source(s)<br>30: Primary care only<br>31: Primary care and other source(s)<br>40: Hospital admissions data only<br>41: Hospital admissions data and other source(s)<br>50: Self-report only<br>51: Self-report and other source(s) | 16666           |                                                                      |
|                         | 131593         | Source of report of K26 (duodenal ulcer)                       |                                                                                                                                                                                                                                                                                            |                 |                                                                      |
|                         | 131595         | Source of report of K27 (peptic ulcer, site unspecified)       |                                                                                                                                                                                                                                                                                            |                 |                                                                      |
|                         | 131597         | Source of report of K28 (gastrojejunal ulcer)                  |                                                                                                                                                                                                                                                                                            |                 |                                                                      |
| GORD                    | 131585         | Source of report of K21 (gastro-oesophageal reflux disease)    |                                                                                                                                                                                                                                                                                            | 54854           |                                                                      |
| IBD                     | 131627         | Source of report of K50 (crohn's disease [regional enteritis]) |                                                                                                                                                                                                                                                                                            | 7045            |                                                                      |
|                         | 131629         | Source of report of K51 (ulcerative colitis)                   |                                                                                                                                                                                                                                                                                            |                 |                                                                      |
| IBS (removed IBD cases) | 131639         | Source of report of K58 (irritable bowel syndrome)             |                                                                                                                                                                                                                                                                                            | 28518           |                                                                      |
| PG <sub>+</sub> M       | 131585         | Source of report of K21 (gastro-oesophageal reflux disease)    |                                                                                                                                                                                                                                                                                            | 90175           |                                                                      |
|                         | 131591         | Source of report of K25 (gastric ulcer)                        |                                                                                                                                                                                                                                                                                            |                 |                                                                      |
|                         | 131593         | Source of report of K26 (duodenal ulcer)                       |                                                                                                                                                                                                                                                                                            |                 |                                                                      |
|                         | 131595         | Source of report of K27 (peptic ulcer, site unspecified)       |                                                                                                                                                                                                                                                                                            |                 |                                                                      |
|                         | 131597         | Source of report of K28 (gastrojejunal ulcer)                  |                                                                                                                                                                                                                                                                                            |                 |                                                                      |
|                         | 41272          | Operative procedures - OPCS4                                   |                                                                                                                                                                                                                                                                                            |                 | G24: Antireflux operations<br>G25: Revision of antireflux operations |
|                         | 6154           | Medication for pain relief, constipation, heartburn            |                                                                                                                                                                                                                                                                                            |                 | 4:Ranitidine (e.g. Zantac)<br>5:Omeprazole (e.g. Zanprol)            |
|                         | 20003          | Treatment/medication code                                      |                                                                                                                                                                                                                                                                                            |                 | Supplementary Table 1                                                |

Supplementary Table 2. Medications for peptic ulcer disease (PUD) and gastro-oesophageal reflux disease (GORD) in UK Biobank.

| Category                     | Coding     | Active ingredient                                                           | ATC code* |
|------------------------------|------------|-----------------------------------------------------------------------------|-----------|
| Maalox tablet                | 1140865358 | Aluminum Hydroxide, Magnesium Hydroxide, Simethicone                        | A02A      |
| Mucogel suspension           | 1140865368 | Aluminum Hydroxide, Magnesium Hydroxide                                     | A02A      |
| Co-magaldrox                 | 1140881318 | Aluminum Hydroxide, Magnesium Hydroxide                                     | A02A      |
| Magnesium trisilicate        | 1140881324 | Magnesium Trisilicate                                                       | A02A      |
| Milk of magnesia suspension  | 1140881550 | Magnesium Hydroxide                                                         | A02AA     |
| Magnesium carbonate          | 1140881320 | Magnesium Carbonate                                                         | A02AA01   |
| Magnesium hydroxide          | 1140881330 | Magnesium Hydroxide                                                         | A02AA04   |
| Rennie duo oral suspension   | 1141166086 | Calcium Carbonate                                                           | A02AC01   |
| Asilone liquid               | 1140881422 | Magnesium Oxide, Aluminum Hydroxide, Dimethicone                            | A02AF     |
| Maalox plus suspension       | 1140865366 | Aluminum Hydroxide, Magnesium Hydroxide                                     | A02AF02   |
| Gastrocote liquid            | 1140881414 | Sodium Bicarbonate, Aluminum Hydroxide, Alginic Acid, Magnesium Trisilicate | A02AX     |
| Gastrocote s/f liquid        | 1140928346 | Sodium Bicarbonate, Aluminum Hydroxide, Alginic Acid, Magnesium Trisilicate | A02AX     |
| Peptac liquid                | 1141168752 | Sodium Bicarbonate, Calcium Carbonate, Alginic Acid                         | A02AX     |
| Gavilast-p 75mg tablet       | 1141188426 | Ranitidine                                                                  | A02BA     |
| Cimetidine                   | 1140865426 | Cimetidine                                                                  | A02BA01   |
| Tagamet 100 tablet           | 1140909500 | Cimetidine                                                                  | A02BA01   |
| Ranitidine                   | 1140879406 | Ranitidine                                                                  | A02BA02   |
| Zantac 75 tablet             | 1140916980 | Ranitidine                                                                  | A02BA02   |
| Famotidine                   | 1140865608 | Famotidine                                                                  | A02BA03   |
| Pepcid ac indigestion tablet | 1140909496 | Famotidine                                                                  | A02BA03   |
| Nizatidine                   | 1140865618 | Nizatidine                                                                  | A02BA04   |
| Misoprostol                  | 1140865628 | Misoprostol                                                                 | A02BB01   |
| Omeprazole                   | 1140865634 | Omeprazole                                                                  | A02BC01   |
| Losec 10mg capsule           | 1140909578 | Omeprazole                                                                  | A02BC01   |
| Pantoprazole                 | 1140929012 | Pantoprazole                                                                | A02BC02   |
| Protium 20mg e/c tablet      | 1141164616 | Pantoprazole                                                                | A02BC02   |
| Lansoprazole                 | 1140864752 | Lansoprazole                                                                | A02BC03   |
| Zoton 15mg capsule           | 1140923688 | Lansoprazole                                                                | A02BC03   |
| Rabeprazole sodium           | 1141168584 | Rabeprazole                                                                 | A02BC04   |

|                        |            |                                                       |         |
|------------------------|------------|-------------------------------------------------------|---------|
| Pariet 10mg e/c tablet | 1141168590 | Rabeprazole                                           | A02BC04 |
| Esomeprazole           | 1141177526 | Esomeprazole                                          | A02BC05 |
| Nexium 20mg tablet     | 1141177532 | Esomeprazole                                          | A02BC05 |
| Acidex oral suspension | 1141172224 | Sodium Bicarbonate, Calcium Carbonate, Alginic Acid   | A02BX   |
| Sucralfate             | 1140865536 | Sucralfate                                            | A02BX02 |
| Antepsin 1g tablet     | 1140865538 | Sucralfate                                            | A02BX02 |
| Gaviscon liquid        | 1140865354 | Sodium Bicarbonate, Calcium Carbonate, Alginic Acid   | A02BX13 |
| Topal tablet           | 1140865370 | Aluminum Hydroxide, Magnesium Carbonate, Alginic Acid | A02BX13 |

\* The Supplementary Data 1 of Wu *et al.*<sup>9</sup> provides UKB medication classification based on Anatomical Therapeutic Chemical (ATC) Classification System<sup>10</sup> and we extracted medications for PUD and GORD (the first two ATC level: A02) as listed above.

Supplementary Table 3. Genome-wide significant SNPs associated with inflammatory bowel disease (IBD) in UK Biobank from BOLT-LMM<sup>11</sup> association analyses.

| SNP         | CHR. | BP        | A1/A2    | A1 Frequency | OR   | P       | Reported SNP* | PMID     |
|-------------|------|-----------|----------|--------------|------|---------|---------------|----------|
| rs148844907 | 6    | 31628397  | T/A      | 0.99         | 0.47 | 9.7E-41 | rs17207986    | 20848476 |
| rs11581607  | 1    | 67707690  | G/A      | 0.93         | 1.51 | 2.2E-24 | rs11209026    | 21102463 |
| rs4655529   | 1    | 67698909  | C/T      | 0.69         | 0.84 | 1.0E-21 | rs7517847     | 17435756 |
| rs2836878   | 21   | 40465534  | G/A      | 0.73         | 1.21 | 2.1E-21 | rs2836878     | 18758464 |
| rs10737482  | 1    | 20173858  | T/C      | 0.39         | 0.86 | 3.4E-16 | rs6426833     | 19915572 |
| rs3024505   | 1    | 206939904 | G/A      | 0.85         | 0.84 | 8.7E-15 | rs3024505     | 21102463 |
| rs6017342   | 20   | 43065028  | A/C      | 0.48         | 0.88 | 1.6E-14 | rs6017342     | 19915572 |
| rs905634    | 1    | 200884985 | C/T      | 0.69         | 1.14 | 7.8E-13 | rs11584383    | 18587394 |
| rs6671847   | 1    | 161478810 | G/A      | 0.49         | 1.13 | 1.6E-12 | rs1801274     | 19915573 |
| rs1297261   | 21   | 16812623  | T/C      | 0.57         | 1.13 | 1.6E-12 | rs1736020     | 21102463 |
| rs10761659  | 10   | 64445564  | A/G      | 0.46         | 0.89 | 9.7E-12 | rs10761659    | 21102463 |
| rs11403745  | 10   | 101282604 | C/CA     | 0.48         | 1.12 | 2.1E-11 | rs4409764     | 21102463 |
| rs35788599  | 12   | 68476749  | G/C      | 0.62         | 0.89 | 3.2E-11 | rs7134599     | 21297633 |
| rs7936312   | 11   | 76293726  | G/T      | 0.52         | 0.90 | 6.7E-11 | rs7927997     | 21102463 |
| rs10799837  | 1    | 20135612  | G/A      | 0.43         | 1.12 | 1.6E-10 | rs1317209     | 20228799 |
| 9:5057580   | 9    | 5057580   | CTTT/C   | 0.56         | 0.90 | 5.4E-10 | rs10758669    | 21102463 |
| rs4551125   | 5    | 40438684  | G/A      | 0.39         | 0.90 | 7.5E-10 | rs11742570    | 21102463 |
| rs59998884  | 21   | 45618114  | T/C      | 0.40         | 1.11 | 1.0E-09 | rs2838519     | 21102463 |
| rs2066847   | 16   | 50763778  | G/GC     | 0.98         | 0.71 | 1.7E-09 | rs2066847     | 20570966 |
| rs17264332  | 6    | 138005515 | A/G      | 0.78         | 0.89 | 2.5E-09 | rs6920220     | 21297633 |
| rs3806306   | 1    | 20143100  | A/G      | 0.62         | 1.11 | 2.6E-09 | rs3806308     | 19122664 |
| rs55722650  | 5    | 131607300 | C/T      | 0.58         | 0.90 | 4.5E-09 | rs12521868    | 21102463 |
| rs6961243   | 7    | 107521404 | G/A      | 0.59         | 1.11 | 5.0E-09 | rs886774      | 19915572 |
| rs1521186   | 1    | 151784547 | G/A      | 0.55         | 0.91 | 7.8E-09 | -             | -        |
| rs13384671  | 2    | 182311594 | A/G      | 0.69         | 0.90 | 9.0E-09 | rs6740847     | 28067908 |
| 5:17098189  | 5    | 17098189  | AT/A     | 0.78         | 1.13 | 1.1E-08 | -             | -        |
| rs73370726  | 10   | 90852873  | C/T      | 0.90         | 1.19 | 1.5E-08 | -             | -        |
| rs12720356  | 19   | 10469975  | A/C      | 0.90         | 0.86 | 2.3E-08 | rs12720356    | 21102463 |
| rs12568930  | 1    | 22702231  | T/C      | 0.82         | 1.14 | 2.6E-08 | rs7524102     | 21297633 |
| rs142738614 | 7    | 128577914 | C/CGCGGG | 0.55         | 0.91 | 3.3E-08 | rs4728142     | 21297633 |
| rs10188217  | 2    | 61217542  | T/C      | 0.48         | 0.91 | 4.3E-08 | rs10181042    | 21102463 |

\* The associations between SNPs from "Reported SNP" column and IBD have been reported by other studies (corresponding PMID column). These SNPs are either same as IBD-associated SNPs in our UK Biobank analysis or in linkage disequilibrium with our IBD-associated SNPs in UK Biobank. For the detailed statistics for those reported SNPs, please refer to **Supplementary Data 1**.

Supplementary Table 4. Genome-wide significant SNPs associated with GORD and PG+M in the UK Biobank from BOLT-LMM<sup>11</sup> association analyses.

| Digestion phenotypes | SNP*        | CHR.     | BP        | A1/A2     | A1 frequency | OR <sup>†</sup> | P                                              | Digestive diseases pleiotropy <sup>‡</sup>     | Mental health pleiotropy <sup>‡</sup>         |
|----------------------|-------------|----------|-----------|-----------|--------------|-----------------|------------------------------------------------|------------------------------------------------|-----------------------------------------------|
| GORD                 | rs2523589   | 6        | 31327334  | G/T       | 0.50         | 0.95            | 4.6E-13                                        | -                                              | §                                             |
|                      | rs967823    | 17       | 50317276  | A/G       | 0.61         | 0.96            | 1.6E-10                                        | -                                              | -                                             |
|                      | rs1430788   | 2        | 67868412  | C/T       | 0.31         | 1.04            | 8.4E-09                                        | -                                              | -                                             |
| PG+M                 | rs200964    | 6        | 27866943  | G/C       | 0.81         | 1.05            | 3.0E-13                                        | -                                              | §                                             |
|                      | rs967823    | 17       | 50317276  | A/G       | 0.61         | 0.96            | 2.4E-12                                        | -                                              | -                                             |
|                      | rs10500661  | 11       | 6273744   | T/C       | 0.80         | 0.96            | 9.7E-12                                        | -                                              | -                                             |
|                      | 19:18793695 | 19       | 18793695  | AAAAG/A   | 0.67         | 1.04            | 2.6E-11                                        | Barrett's esophagus, Esophageal adenocarcinoma | -                                             |
|                      | rs2861694   | 2        | 67845739  | A/G       | 0.31         | 1.04            | 1.0E-10                                        | -                                              | -                                             |
|                      | rs12631337  | 3        | 50198537  | A/G       | 0.45         | 1.03            | 1.5E-10                                        | -                                              | SCZ, depressive symptoms and depressed affect |
|                      | rs61787782  | 1        | 98310239  | A/G       | 0.78         | 0.96            | 8.1E-10                                        | -                                              | SCZ, ADHD, ASD, anorexia nervosa, etc.        |
|                      | 2:100485494 | 2        | 100485494 | CCCTCTG/C | 0.64         | 1.03            | 1.9E-09                                        | -                                              | -                                             |
|                      | rs10641969  | 4        | 140940097 | T/TCAA    | 0.62         | 1.03            | 3.1E-09                                        | -                                              | -                                             |
|                      | rs62435650  | 7        | 1823265   | A/G       | 0.80         | 1.04            | 3.9E-09                                        | -                                              | Depression, depressed affect and BIP          |
|                      | rs12064884  | 1        | 66364651  | A/G       | 0.50         | 1.03            | 5.2E-09                                        | -                                              | ADHD, stress-related disorders, etc.          |
| rs13097265           | 3           | 70943143 | G/A       | 0.71      | 0.97         | 7.5E-09         | Barrett's esophagus, Esophageal adenocarcinoma | -                                              |                                               |

|  |           |    |          |     |      |      |         |   |                     |
|--|-----------|----|----------|-----|------|------|---------|---|---------------------|
|  | rs1873914 | 12 | 56379427 | G/C | 0.58 | 1.03 | 4.8E-08 | - | Anorexia<br>nervosa |
|--|-----------|----|----------|-----|------|------|---------|---|---------------------|

\* Locus zoom plot for SNPs are in Supplementary Fig. 5-6.

† Odds ratio (OR) is for risk of A1 allele compared to A2 allele.

‡ We only annotated SNPs if there are SNPs reported associated with either mental health-related traits or digestive diseases from GWAS Catalog<sup>12</sup> in linkage disequilibrium with our UKB digestion SNPs (see **Methods** and **Supplementary Data 1** for detailed description). “§” represents that SNP is within MHC region. For SNPs within MHC region see **Supplementary Data 1** for details given the complexity of MHC region.

Abbreviations: ASD: Autism spectrum disorder; BIP: Bipolar disorder; SCZ: Schizophrenia; ADHD: Attention deficit hyperactivity disorder.



Supplementary Table 5. GERA peptic ulcer and irritable bowel syndrome (IBS) GWAS summary statistics for SNPs associated with UKB peptic ulcer diseases and IBS ( $P < 5 \times 10^{-8}$ ).

| Trait | SNP         | CHR. | BP        | UKB statistics |              |      |         | Power for replication at GERA sample size |                       |                    | GERA statistics |              |      |      |
|-------|-------------|------|-----------|----------------|--------------|------|---------|-------------------------------------------|-----------------------|--------------------|-----------------|--------------|------|------|
|       |             |      |           | A1/A2          | A1 frequency | OR*  | P       | Alpha level                               | No. of cases/controls | Power <sup>†</sup> | A1/A2           | A1 frequency | OR*  | P    |
| PUD   | rs681343    | 19   | 49206462  | C/T            | 0.49         | 0.92 | 1.9E-15 | 0.05/8                                    | 1004/60843            | 0.26               | C/T             | 0.51         | 0.84 | 5E-4 |
|       | rs2976388   | 8    | 143760256 | G/A            | 0.58         | 1.09 | 1.8E-14 |                                           |                       | 0.27               | G/A             | 0.57         | 1.07 | 0.12 |
|       | rs10500661  | 11   | 6273744   | T/C            | 0.80         | 0.90 | 4.1E-14 |                                           |                       | 0.29               | T/C             | 0.79         | 0.90 | 0.08 |
|       | rs147048677 | 1    | 155161794 | C/T            | 0.94         | 0.86 | 9.0E-12 |                                           |                       | 0.20               | C/T             | 0.95         | 0.87 | 0.20 |
|       | rs78459074  | 11   | 1029905   | A/G            | 0.89         | 1.12 | 2.6E-10 |                                           |                       | 0.17               | -               | -            | -    | -    |
|       | rs34074411  | 17   | 39867248  | C/T            | 0.56         | 0.93 | 2.6E-10 |                                           |                       | 0.19               | -               | -            | -    | -    |
|       | rs687621    | 9    | 136137065 | A/G            | 0.68         | 1.08 | 1.3E-09 |                                           |                       | 0.18               | A/G             | 0.66         | 1.13 | 0.02 |
|       | rs9581957   | 13   | 28557889  | C/T            | 0.68         | 0.93 | 3.6E-09 |                                           |                       | 0.17               | C/T             | 0.68         | 0.96 | 0.41 |
| IBS   | rs7947502   | 11   | 112909396 | C/T            | 0.41         | 1.05 | 2.5E-08 | 0.05/2                                    | 3359/58488            | 0.48               | C/T             | 0.41         | 1.04 | 0.14 |
|       | rs2523599   | 6    | 31241092  | C/G            | 0.39         | 0.95 | 4.4E-08 |                                           |                       | 0.51               | -               | -            | -    | -    |

\* Odds ratio (OR) is for risk of A1 allele compared to A2 allele.

<sup>†</sup> Power to detect SNPs with statistical significance at an alpha level and the GERA sample size. The power for each SNP were calculated using RPower package<sup>13</sup>. Since the average power for the PUD SNPs is 20%, identifying 1 in 6 available for testing in line with these power calculations.

Supplementary Table 6. SNP-based heritability estimates and other parameters from LD score regression analysis<sup>14</sup>.

| Digestion Phenotypes  | $\lambda_{GC}^*$ | Intercept (s.e.) | h2_observed (s.e.) | Population lifetime risk <sup>†</sup> | h2_liability (s.e.) |
|-----------------------|------------------|------------------|--------------------|---------------------------------------|---------------------|
| PUD                   | 1.10             | 1.01 (0.007)     | 0.01 (0.001)       | 0.037                                 | 0.06 (0.007)        |
| GORD                  | 1.25             | 1.02 (0.008)     | 0.03 (0.002)       | 0.120                                 | 0.08 (0.004)        |
| PG <sub>4</sub> M     | 1.43             | 1.04 (0.008)     | 0.05 (0.002)       | 0.198                                 | 0.09 (0.003)        |
| IBS                   | 1.15             | 1.00 (0.007)     | 0.02 (0.001)       | 0.063                                 | 0.06 (0.005)        |
| IBD                   | 1.11             | 1.03 (0.008)     | 0.01 (0.002)       | 0.015                                 | 0.11 (0.016)        |
| PUD (RO) <sup>‡</sup> | 1.05             | 1.01 (0.006)     | 0.006 (0.001)      | 0.023                                 | 0.046 (0.008)       |
| GORD (RO)             | 1.20             | 1.02 (0.008)     | 0.022 (0.001)      | 0.095                                 | 0.066 (0.004)       |
| IBS (RO)              | 1.05             | 1.00 (0.007)     | 0.008 (0.001)      | 0.046                                 | 0.038 (0.006)       |
| IBD (RO)              | 1.10             | 1.03 (0.008)     | 0.008 (0.002)      | 0.012                                 | 0.096 (0.018)       |
| PUD (RTO)             | 1.10             | 1.01 (0.007)     | 0.009 (0.001)      | 0.033                                 | 0.050 (0.007)       |
| IBS (RTO)             | 1.10             | 1.01 (0.007)     | 0.013 (0.001)      | 0.059                                 | 0.052 (0.005)       |

\* The calculation for  $\lambda_{GC}$  is from LD score regression.

<sup>†</sup> We used the proportion of sample that are cases as the estimates of population lifetime.

<sup>‡</sup> We note that the case ascertainment for RO and RTO ascertainment means that assumptions underlying conversion of SNP-based heritabilities to the liability scale may be violated.

Abbreviation: s.e.: standard error; RO: remove individuals with more than one of PUD, GORD, IBS and IBD disorders; RTO: remove the overlapped individuals with both PUD and IBS.

Supplementary Table 7. Genetic correlation estimates for each pair of the five original digestion phenotypes and each pair of the five sensitivity digestion phenotypes from bivariate LD score regression analysis<sup>15</sup>. (see **Fig. 4b** and **Supplementary Fig. 9c<sub>1</sub>**)

| Trait1                | Trait2            | rg    | se    | p        | gcov int* | gcov int se |
|-----------------------|-------------------|-------|-------|----------|-----------|-------------|
| PUD                   | GORD              | 0.65  | 0.052 | 4.9E-36  | 0.12      | 0.005       |
| PUD                   | PG <sub>+</sub> M | 0.76  | 0.036 | 5.1E-101 | 0.40      | 0.006       |
| PUD                   | IBS               | 0.49  | 0.077 | 2.0E-10  | 0.04      | 0.005       |
| PUD                   | IBD               | 0.07  | 0.084 | 3.7E-01  | 0.03      | 0.006       |
| GORD                  | PUD               | 0.65  | 0.052 | 4.9E-36  | 0.12      | 0.005       |
| GORD                  | PG <sub>+</sub> M | 0.97  | 0.008 | 0.0E+00  | 0.77      | 0.007       |
| GORD                  | IBS               | 0.65  | 0.045 | 1.1E-46  | 0.10      | 0.005       |
| GORD                  | IBD               | 0.19  | 0.056 | 9.0E-04  | 0.02      | 0.005       |
| PG <sub>+</sub> M     | PUD               | 0.76  | 0.036 | 5.1E-101 | 0.40      | 0.006       |
| PG <sub>+</sub> M     | GORD              | 0.97  | 0.008 | 0.0E+00  | 0.77      | 0.007       |
| PG <sub>+</sub> M     | IBS               | 0.64  | 0.040 | 1.4E-57  | 0.11      | 0.006       |
| PG <sub>+</sub> M     | IBD               | 0.19  | 0.048 | 1.0E-04  | 0.03      | 0.006       |
| IBS                   | PUD               | 0.49  | 0.077 | 2.0E-10  | 0.04      | 0.005       |
| IBS                   | GORD              | 0.65  | 0.045 | 1.1E-46  | 0.10      | 0.005       |
| IBS                   | PG <sub>+</sub> M | 0.64  | 0.040 | 1.4E-57  | 0.11      | 0.006       |
| IBS                   | IBD               | 0.02  | 0.070 | 7.6E-01  | -0.02     | 0.005       |
| IBD                   | PUD               | 0.07  | 0.084 | 3.7E-01  | 0.03      | 0.006       |
| IBD                   | GORD              | 0.19  | 0.056 | 9.0E-04  | 0.02      | 0.005       |
| IBD                   | PG <sub>+</sub> M | 0.19  | 0.048 | 1.0E-04  | 0.03      | 0.006       |
| IBD                   | IBS               | 0.02  | 0.070 | 7.6E-01  | -0.02     | 0.005       |
| PUD (RO) <sup>†</sup> | GORD (RO)         | 0.38  | 0.082 | 3.6E-06  | -0.05     | 0.005       |
| PUD (RO)              | IBS (RO)          | 0.25  | 0.117 | 3.4E-02  | -0.03     | 0.005       |
| PUD (RO)              | IBD (RO)          | -0.12 | 0.120 | 3.4E-01  | -0.02     | 0.005       |
| GORD (RO)             | PUD (RO)          | 0.38  | 0.082 | 3.6E-06  | -0.05     | 0.005       |
| GORD (RO)             | IBS (RO)          | 0.47  | 0.075 | 3.4E-10  | -0.08     | 0.005       |
| GORD (RO)             | IBD (RO)          | 0.02  | 0.075 | 7.8E-01  | -0.04     | 0.005       |
| IBS (RO)              | PUD (RO)          | 0.25  | 0.117 | 3.4E-02  | -0.03     | 0.005       |
| IBS (RO)              | GORD (RO)         | 0.47  | 0.075 | 3.4E-10  | -0.08     | 0.005       |
| IBS (RO)              | IBD (RO)          | -0.08 | 0.101 | 4.4E-01  | -0.01     | 0.005       |
| IBD (RO)              | PUD (RO)          | -0.12 | 0.120 | 3.4E-01  | -0.02     | 0.005       |
| IBD (RO)              | GORD (RO)         | 0.02  | 0.075 | 7.8E-01  | -0.04     | 0.005       |
| IBD (RO)              | IBS (RO)          | -0.08 | 0.101 | 4.4E-01  | -0.01     | 0.005       |

\* In LD score regression the sample overlap is partitioned into the gcov\_int (the genetic covariance intercept) for which the expected value is phenotypic correlation \* proportion of shared individuals between the two GWAS datasets contributing to the LDSC genetic correlation analysis.

† RO: remove individuals with more than one of PUD, GORD, IBS and IBD disorders.

Supplementary Table 8. SNP-based heritability estimates and other parameters from LD score regression<sup>14</sup> for self-report, primary care and hospital admission subgroup phenotypes for each of PUD, GORD and IBS. (see **Supplementary Fig. 10c**)

| Digestion Phenotypes    | $\lambda_{GC}^*$ | Intercept (s.e.) | h2_observed (s.e.) | Population lifetime risk <sup>†</sup> | h2_liability (s.e.) |
|-------------------------|------------------|------------------|--------------------|---------------------------------------|---------------------|
| PUD                     | 1.10             | 1.01 (0.007)     | 0.011 (0.001)      | 0.037                                 | 0.058 (0.007)       |
| PUD Hospital Admission  | 1.05             | 1.01 (0.006)     | 0.003 (0.001)      | 0.016                                 | 0.052 (0.017)       |
| PUD Self Report         | 1.05             | 1.01 (0.007)     | 0.004 (0.001)      | 0.008                                 | 0.068 (0.020)       |
| PUD Primary Care        | 1.05             | 1.01 (0.006)     | 0.003 (0.001)      | 0.007                                 | 0.028 (0.010)       |
| GORD                    | 1.25             | 1.02 (0.008)     | 0.029 (0.002)      | 0.120                                 | 0.077 (0.004)       |
| GORD Hospital Admission | 1.10             | 1.00 (0.007)     | 0.011 (0.001)      | 0.054                                 | 0.065 (0.008)       |
| GORD Self Report        | 1.05             | 1.02 (0.006)     | 0.004 (0.001)      | 0.032                                 | 0.038 (0.011)       |
| GORD Primary Care       | 1.15             | 1.01 (0.007)     | 0.015 (0.001)      | 0.018                                 | 0.063 (0.006)       |
| IBS                     | 1.15             | 1.00 (0.007)     | 0.015 (0.001)      | 0.063                                 | 0.057 (0.005)       |
| IBS Hospital Admission  | 1.05             | 1.00 (0.007)     | 0.005 (0.001)      | 0.009                                 | 0.049 (0.012)       |
| IBS Self Report         | 1.05             | 1.01 (0.006)     | 0.005 (0.001)      | 0.016                                 | 0.035 (0.008)       |
| IBS Primary Care        | 1.05             | 1.00 (0.007)     | 0.004 (0.001)      | 0.029                                 | 0.052 (0.015)       |

\* The calculation for  $\lambda_{GC}$  is from LD score regression.

† We used the proportion of sample that are cases as the estimates of population lifetime.

Supplementary Table 9. Genetic correlation among self-report, primary care and hospital admission subgroup phenotypes for each of PUD, GORD and IBS from bivariate LD score regression analysis<sup>15</sup>. (see **Supplementary Fig. 10d**)

| Trait1                  | Trait2                  | rg   | se    | p        | gcov_int* | gcov_int_se |
|-------------------------|-------------------------|------|-------|----------|-----------|-------------|
| PUD Hospital Admission  | PUD Primary Care        | 0.94 | 0.299 | 1.6E-03  | 0.01      | 0.005       |
| PUD Hospital Admission  | PUD Self Report         | 0.81 | 0.312 | 9.7E-03  | 0.02      | 0.005       |
| PUD Hospital Admission  | PUD                     | 1.06 | 0.111 | 2.2E-21  | 0.66      | 0.005       |
| PUD Primary Care        | PUD Hospital Admission  | 0.94 | 0.299 | 1.6E-03  | 0.01      | 0.005       |
| PUD Primary Care        | PUD Self Report         | 0.49 | 0.230 | 3.3E-02  | 0.02      | 0.005       |
| PUD Primary Care        | PUD                     | 0.89 | 0.099 | 2.9E-19  | 0.44      | 0.005       |
| PUD Self Report         | PUD Hospital Admission  | 0.81 | 0.312 | 9.7E-03  | 0.02      | 0.005       |
| PUD Self Report         | PUD Primary Care        | 0.49 | 0.230 | 3.3E-02  | 0.02      | 0.005       |
| PUD Self Report         | PUD                     | 0.82 | 0.104 | 2.8E-15  | 0.48      | 0.005       |
| PUD                     | PUD Hospital Admission  | 1.06 | 0.111 | 2.2E-21  | 0.66      | 0.005       |
| PUD                     | PUD Primary Care        | 0.89 | 0.099 | 2.9E-19  | 0.44      | 0.005       |
| PUD                     | PUD Self Report         | 0.82 | 0.104 | 2.8E-15  | 0.48      | 0.005       |
| GORD Hospital Admission | GORD Primary Care       | 0.80 | 0.146 | 4.1E-08  | 0.03      | 0.005       |
| GORD Hospital Admission | GORD Self Report        | 0.78 | 0.079 | 1.8E-23  | 0.05      | 0.005       |
| GORD Hospital Admission | GORD                    | 0.97 | 0.020 | 0.0E+00  | 0.68      | 0.006       |
| GORD Primary Care       | GORD Hospital Admission | 0.80 | 0.146 | 4.1E-08  | 0.03      | 0.005       |
| GORD Primary Care       | GORD Self Report        | 0.62 | 0.161 | 1.0E-04  | 0.03      | 0.005       |
| GORD Primary Care       | GORD                    | 0.86 | 0.105 | 3.4E-16  | 0.40      | 0.005       |
| GORD Self Report        | GORD Hospital Admission | 0.78 | 0.079 | 1.8E-23  | 0.05      | 0.005       |
| GORD Self Report        | GORD Primary Care       | 0.62 | 0.161 | 1.0E-04  | 0.03      | 0.005       |
| GORD Self Report        | GORD                    | 0.89 | 0.037 | 7.9E-129 | 0.53      | 0.006       |
| GORD                    | GORD Hospital Admission | 0.97 | 0.020 | 0.0E+00  | 0.68      | 0.006       |
| GORD                    | GORD Primary Care       | 0.86 | 0.105 | 3.4E-16  | 0.40      | 0.005       |
| GORD                    | GORD Self Report        | 0.89 | 0.037 | 7.9E-129 | 0.53      | 0.006       |
| IBS Hospital Admission  | IBS Primary Care        | 0.85 | 0.212 | 5.8E-05  | 0.01      | 0.005       |
| IBS Hospital Admission  | IBS Self Report         | 0.71 | 0.210 | 7.0E-04  | 0.02      | 0.005       |
| IBS Hospital Admission  | IBS                     | 1.01 | 0.119 | 1.8E-17  | 0.35      | 0.005       |
| IBS Primary Care        | IBS Hospital Admission  | 0.85 | 0.212 | 5.8E-05  | 0.01      | 0.005       |
| IBS Primary Care        | IBS Self Report         | 0.63 | 0.158 | 5.8E-05  | 0.02      | 0.005       |
| IBS Primary Care        | IBS                     | 0.94 | 0.052 | 1.2E-74  | 0.67      | 0.005       |
| IBS Self Report         | IBS Hospital Admission  | 0.71 | 0.210 | 7.0E-04  | 0.02      | 0.005       |
| IBS Self Report         | IBS Primary Care        | 0.63 | 0.158 | 5.8E-05  | 0.02      | 0.005       |
| IBS Self Report         | IBS                     | 0.79 | 0.068 | 1.1E-31  | 0.50      | 0.006       |
| IBS                     | IBS Hospital Admission  | 1.01 | 0.119 | 1.8E-17  | 0.35      | 0.005       |
| IBS                     | IBS Primary Care        | 0.94 | 0.052 | 1.2E-74  | 0.67      | 0.005       |

|     |                 |      |       |         |      |       |
|-----|-----------------|------|-------|---------|------|-------|
| IBS | IBS Self Report | 0.79 | 0.068 | 1.1E-31 | 0.50 | 0.006 |
|-----|-----------------|------|-------|---------|------|-------|

\* In LD score regression the sample overlap is partitioned into the  $gcov\_int$  (the genetic covariance intercept) for which the expected value is phenotypic correlation \* proportion of shared individuals between the two GWAS datasets contributing to the LDSC genetic correlation analysis.

Supplementary Table 10. Genetic correlation estimates between each of the five digestion phenotypes and 9 psychiatric and neurological traits from bivariate LD score regression analysis<sup>15</sup>. (see Fig. 4b)

| Trait1 | Trait2                   | rg    | se    | p       | h2 (obs) | h2 se (obs) | h2 int | h2 int se | gcov int* | gcov int se |
|--------|--------------------------|-------|-------|---------|----------|-------------|--------|-----------|-----------|-------------|
| PUD    | ADHD <sup>†</sup>        | 0.48  | 0.057 | 9.1E-17 | 0.24     | 0.016       | 1.03   | 0.010     | 0.01      | 0.006       |
|        | Schizophrenia            | 0.13  | 0.040 | 1.0E-03 | 0.42     | 0.015       | 1.05   | 0.012     | 0.00      | 0.006       |
|        | Anxiety                  | 0.26  | 0.179 | 1.5E-01 | 0.06     | 0.026       | 1.00   | 0.007     | 0.00      | 0.005       |
|        | PTSD                     | 0.30  | 0.164 | 7.2E-02 | 0.05     | 0.022       | 0.99   | 0.007     | 0.00      | 0.005       |
|        | Bipolar disorder         | 0.01  | 0.046 | 8.0E-01 | 0.34     | 0.015       | 1.02   | 0.008     | 0.00      | 0.005       |
|        | Autism spectrum disorder | 0.00  | 0.066 | 9.7E-01 | 0.20     | 0.015       | 1.00   | 0.008     | 0.00      | 0.006       |
|        | Alzheimer's disease      | 0.08  | 0.093 | 4.0E-01 | 0.01     | 0.005       | 1.06   | 0.052     | 0.00      | 0.005       |
|        | Parkinson's disease      | -0.03 | 0.062 | 5.8E-01 | 0.02     | 0.002       | 0.98   | 0.008     | 0.00      | 0.005       |
|        | Major depression 2018    | 0.37  | 0.045 | 2.1E-16 | 0.06     | 0.003       | 1.01   | 0.010     | 0.01      | 0.006       |
| GORD   | ADHD                     | 0.49  | 0.036 | 3.1E-42 | 0.24     | 0.016       | 1.03   | 0.010     | 0.00      | 0.006       |
|        | Schizophrenia            | 0.03  | 0.027 | 2.4E-01 | 0.42     | 0.015       | 1.05   | 0.012     | 0.01      | 0.006       |
|        | Anxiety                  | 0.30  | 0.127 | 1.7E-02 | 0.06     | 0.026       | 1.00   | 0.007     | 0.01      | 0.005       |
|        | PTSD                     | 0.23  | 0.119 | 4.8E-02 | 0.05     | 0.022       | 0.99   | 0.007     | 0.00      | 0.005       |
|        | Bipolar disorder         | -0.04 | 0.034 | 2.5E-01 | 0.34     | 0.015       | 1.02   | 0.008     | 0.00      | 0.006       |
|        | Autism spectrum disorder | -0.01 | 0.043 | 8.6E-01 | 0.20     | 0.015       | 1.00   | 0.008     | 0.01      | 0.006       |
|        | Alzheimer's disease      | 0.01  | 0.059 | 9.0E-01 | 0.01     | 0.005       | 1.06   | 0.052     | 0.01      | 0.006       |
|        | Parkinson's disease      | -0.07 | 0.041 | 1.0E-01 | 0.02     | 0.002       | 0.98   | 0.008     | 0.00      | 0.005       |
|        | Major depression 2018    | 0.37  | 0.027 | 3.3E-41 | 0.06     | 0.003       | 1.01   | 0.010     | 0.01      | 0.006       |
| PG+M   | ADHD                     | 0.56  | 0.032 | 5.0E-66 | 0.24     | 0.016       | 1.03   | 0.010     | 0.01      | 0.007       |
|        | Schizophrenia            | 0.04  | 0.024 | 1.1E-01 | 0.42     | 0.015       | 1.05   | 0.012     | 0.01      | 0.007       |
|        | Anxiety                  | 0.37  | 0.132 | 5.5E-03 | 0.06     | 0.026       | 1.00   | 0.007     | 0.01      | 0.005       |
|        | PTSD                     | 0.30  | 0.107 | 4.3E-03 | 0.05     | 0.022       | 0.99   | 0.007     | 0.00      | 0.005       |
|        | Bipolar disorder         | -0.02 | 0.030 | 5.2E-01 | 0.34     | 0.015       | 1.02   | 0.008     | 0.00      | 0.006       |
|        | Autism spectrum disorder | 0.06  | 0.039 | 1.4E-01 | 0.20     | 0.015       | 1.00   | 0.008     | 0.01      | 0.006       |
|        | Alzheimer's disease      | -0.03 | 0.050 | 6.0E-01 | 0.01     | 0.005       | 1.06   | 0.052     | 0.01      | 0.006       |
|        | Parkinson's disease      | -0.06 | 0.037 | 1.2E-01 | 0.02     | 0.002       | 0.98   | 0.008     | 0.00      | 0.005       |
|        | Major depression 2018    | 0.43  | 0.024 | 1.4E-74 | 0.06     | 0.003       | 1.01   | 0.010     | 0.01      | 0.006       |

|     |                          |       |       |         |      |       |      |       |       |       |
|-----|--------------------------|-------|-------|---------|------|-------|------|-------|-------|-------|
| IBS | ADHD                     | 0.30  | 0.057 | 1.8E-07 | 0.24 | 0.016 | 1.03 | 0.010 | 0.00  | 0.006 |
|     | Schizophrenia            | 0.15  | 0.036 | 3.2E-05 | 0.42 | 0.015 | 1.05 | 0.012 | 0.00  | 0.007 |
|     | Anxiety                  | 0.30  | 0.152 | 4.9E-02 | 0.06 | 0.026 | 1.00 | 0.007 | 0.00  | 0.005 |
|     | PTSD                     | 0.34  | 0.182 | 6.2E-02 | 0.05 | 0.022 | 0.99 | 0.007 | 0.00  | 0.005 |
|     | Bipolar disorder         | 0.07  | 0.048 | 1.4E-01 | 0.34 | 0.015 | 1.02 | 0.008 | 0.01  | 0.006 |
|     | Autism spectrum disorder | 0.21  | 0.061 | 7.0E-04 | 0.20 | 0.015 | 1.00 | 0.008 | -0.01 | 0.005 |
|     | Alzheimer's disease      | 0.05  | 0.085 | 5.7E-01 | 0.01 | 0.005 | 1.06 | 0.052 | 0.01  | 0.005 |
|     | Parkinson's disease      | 0.09  | 0.057 | 1.3E-01 | 0.02 | 0.002 | 0.98 | 0.008 | 0.00  | 0.005 |
|     | Major depression 2018    | 0.49  | 0.042 | 1.1E-31 | 0.06 | 0.003 | 1.01 | 0.010 | 0.01  | 0.006 |
| IBD | ADHD                     | 0.00  | 0.059 | 9.6E-01 | 0.24 | 0.016 | 1.03 | 0.010 | 0.01  | 0.006 |
|     | Schizophrenia            | 0.04  | 0.040 | 3.7E-01 | 0.42 | 0.015 | 1.05 | 0.012 | 0.00  | 0.006 |
|     | Anxiety                  | 0.23  | 0.148 | 1.2E-01 | 0.06 | 0.026 | 1.00 | 0.007 | 0.00  | 0.005 |
|     | PTSD                     | 0.20  | 0.161 | 2.1E-01 | 0.05 | 0.022 | 0.99 | 0.007 | 0.00  | 0.005 |
|     | Bipolar disorder         | 0.02  | 0.053 | 7.6E-01 | 0.34 | 0.015 | 1.02 | 0.008 | 0.00  | 0.006 |
|     | Autism spectrum disorder | -0.05 | 0.059 | 3.8E-01 | 0.20 | 0.015 | 1.00 | 0.008 | 0.01  | 0.005 |
|     | Alzheimer's disease      | -0.05 | 0.092 | 5.9E-01 | 0.01 | 0.005 | 1.06 | 0.052 | 0.00  | 0.005 |
|     | Parkinson's disease      | -0.07 | 0.065 | 2.5E-01 | 0.02 | 0.002 | 0.98 | 0.008 | 0.00  | 0.005 |
|     | Major depression 2018    | 0.15  | 0.043 | 3.0E-04 | 0.06 | 0.003 | 1.01 | 0.010 | 0.00  | 0.005 |

\* In LD score regression the sample overlap is partitioned into the  $gcov\_int$  (the genetic covariance intercept) for which the expected value is phenotypic correlation \* proportion of shared individuals between the two GWAS datasets contributing to the LDSC genetic correlation analysis.

† Cells highlighted with yellow represent that genetic correlation are still significant after Bonferroni correction.



Supplementary Table 11. Genetic correlation estimates between each of the five sensitivity analyses phenotypes and 9 psychiatric and neurologic traits from bivariate LD score regression analysis<sup>15</sup>. (see **Supplementary Fig. 9c**)

| Trait1*   | Trait2                   | rg    | se    | p       | gcov int <sup>†</sup> | gcov int se |
|-----------|--------------------------|-------|-------|---------|-----------------------|-------------|
| PUD (RO)  | ADHD                     | 0.40  | 0.077 | 1.8E-07 | 0.01                  | 0.006       |
|           | Schizophrenia            | 0.06  | 0.050 | 2.0E-01 | 0.00                  | 0.006       |
|           | Anxiety                  | 0.34  | 0.228 | 1.4E-01 | 0.00                  | 0.005       |
|           | PTSD                     | 0.36  | 0.223 | 1.1E-01 | 0.00                  | 0.005       |
|           | Bipolar disorder         | -0.05 | 0.061 | 4.0E-01 | 0.00                  | 0.005       |
|           | Autism spectrum disorder | 0.03  | 0.073 | 7.1E-01 | 0.00                  | 0.005       |
|           | Alzheimer's disease      | -0.02 | 0.112 | 8.6E-01 | 0.01                  | 0.005       |
|           | Parkinson's disease      | -0.02 | 0.074 | 7.6E-01 | 0.01                  | 0.004       |
|           | Major depression 2018    | 0.34  | 0.059 | 1.2E-08 | 0.00                  | 0.005       |
| GORD (RO) | ADHD                     | 0.47  | 0.042 | 3.1E-29 | 0.00                  | 0.006       |
|           | Schizophrenia            | -0.01 | 0.029 | 6.9E-01 | 0.01                  | 0.006       |
|           | Anxiety                  | 0.27  | 0.133 | 3.9E-02 | 0.01                  | 0.005       |
|           | PTSD                     | 0.12  | 0.123 | 3.1E-01 | 0.00                  | 0.005       |
|           | Bipolar disorder         | -0.08 | 0.037 | 4.0E-02 | 0.00                  | 0.005       |
|           | Autism spectrum disorder | 0.00  | 0.048 | 9.3E-01 | 0.01                  | 0.006       |
|           | Alzheimer's disease      | -0.05 | 0.064 | 4.1E-01 | 0.01                  | 0.006       |
|           | Parkinson's disease      | -0.08 | 0.044 | 6.7E-02 | 0.00                  | 0.005       |
|           | Major depression 2018    | 0.33  | 0.031 | 1.4E-27 | 0.01                  | 0.005       |
| IBS (RO)  | ADHD                     | 0.20  | 0.071 | 4.3E-03 | 0.00                  | 0.006       |
|           | Schizophrenia            | 0.16  | 0.048 | 1.0E-03 | -0.01                 | 0.006       |
|           | Anxiety                  | 0.31  | 0.193 | 1.1E-01 | 0.00                  | 0.005       |
|           | PTSD                     | 0.14  | 0.208 | 5.1E-01 | 0.01                  | 0.005       |
|           | Bipolar disorder         | 0.05  | 0.060 | 3.9E-01 | 0.01                  | 0.005       |
|           | Autism spectrum disorder | 0.33  | 0.074 | 6.7E-06 | -0.01                 | 0.005       |
|           | Alzheimer's disease      | -0.04 | 0.119 | 7.2E-01 | 0.01                  | 0.005       |
|           | Parkinson's disease      | 0.14  | 0.073 | 5.9E-02 | 0.00                  | 0.005       |
|           | Major depression 2018    | 0.49  | 0.057 | 6.5E-18 | 0.00                  | 0.006       |
| IBD (RO)  | ADHD                     | -0.09 | 0.069 | 1.8E-01 | 0.01                  | 0.006       |
|           | Schizophrenia            | 0.02  | 0.043 | 6.8E-01 | 0.00                  | 0.006       |
|           | Anxiety                  | 0.25  | 0.168 | 1.4E-01 | 0.00                  | 0.005       |

|                          |       |       |         |      |       |
|--------------------------|-------|-------|---------|------|-------|
| PTSD                     | 0.10  | 0.186 | 6.0E-01 | 0.00 | 0.005 |
| Bipolar disorder         | -0.01 | 0.059 | 9.1E-01 | 0.00 | 0.005 |
| Autism spectrum disorder | -0.06 | 0.065 | 3.7E-01 | 0.00 | 0.005 |
| Alzheimer's disease      | -0.06 | 0.110 | 5.8E-01 | 0.00 | 0.005 |
| Parkinson's disease      | -0.08 | 0.074 | 2.6E-01 | 0.00 | 0.005 |
| Major depression 2018    | 0.11  | 0.050 | 3.4E-02 | 0.00 | 0.006 |

\* RO: remove individuals with more than one of PUD, GORD, IBS and IBD disorders.

† In LD score regression the sample overlap is partitioned into the gcov\_int (the genetic covariance intercept) for which the expected value is phenotypic correlation \* proportion of shared individuals between the two GWAS datasets contributing to the LDSC genetic correlation analysis.

Supplementary Table 12. Results of partitioning SNP-based heritability analysis<sup>16</sup> for GORD, PG<sub>+</sub>M, IBS and IBD by functional annotation based on the variants within each category after Bonferroni correction. (see

**Supplementary Fig. 11)**

| Trait                       | Category                    | Prop. _SNPs | Prop. h <sup>2</sup> | Prop. h <sup>2</sup> s.e. | Enrichment | Enrichment s.e. | Enrichment p |
|-----------------------------|-----------------------------|-------------|----------------------|---------------------------|------------|-----------------|--------------|
| GORD                        | Conserved                   | 0.03        | 0.39                 | 0.067                     | 14.90      | 2.553           | 1.2E-07      |
|                             | Conserved (extend 500)      | 0.33        | 0.58                 | 0.063                     | 1.75       | 0.190           | 1.2E-04      |
|                             | H3K4me1 (extend 500)        | 0.61        | 0.93                 | 0.061                     | 1.53       | 0.100           | 2.1E-06      |
| PG <sub>+</sub> M           | Conserved                   | 0.03        | 0.38                 | 0.045                     | 14.60      | 1.722           | 1.6E-13      |
|                             | Conserved (extend 500)      | 0.33        | 0.61                 | 0.048                     | 1.85       | 0.145           | 2.2E-08      |
|                             | DHS (extend 500)            | 0.50        | 0.85                 | 0.067                     | 1.71       | 0.134           | 8.0E-07      |
|                             | Fetal DHS                   | 0.08        | 0.34                 | 0.067                     | 4.05       | 0.792           | 1.4E-04      |
|                             | Fetal DHS (extend 500)      | 0.29        | 0.59                 | 0.064                     | 2.06       | 0.223           | 5.5E-06      |
|                             | H3K27ac                     | 0.39        | 0.51                 | 0.031                     | 1.31       | 0.078           | 1.6E-04      |
|                             | H3K27ac PGC2 (extend 500)   | 0.34        | 0.52                 | 0.045                     | 1.53       | 0.134           | 1.0E-04      |
|                             | H3K4me1 (extend 500)        | 0.61        | 0.91                 | 0.042                     | 1.49       | 0.068           | 1.0E-10      |
|                             | H3K4me3                     | 0.13        | 0.34                 | 0.048                     | 2.54       | 0.361           | 2.0E-05      |
|                             | H3K9ac                      | 0.13        | 0.37                 | 0.051                     | 2.90       | 0.404           | 2.6E-06      |
|                             | H3K9ac (extend 500)         | 0.23        | 0.48                 | 0.051                     | 2.07       | 0.223           | 4.8E-06      |
|                             | Intron                      | 0.39        | 0.49                 | 0.023                     | 1.25       | 0.059           | 1.9E-05      |
|                             | Intron (extend 500)         | 0.40        | 0.47                 | 0.020                     | 1.19       | 0.050           | 1.6E-04      |
|                             | Repressed (extend 500)      | 0.72        | 0.61                 | 0.028                     | 0.85       | 0.039           | 1.7E-04      |
|                             | Super Enhancer              | 0.17        | 0.24                 | 0.018                     | 1.45       | 0.108           | 5.4E-05      |
| Super Enhancer (extend 500) | 0.17                        | 0.25        | 0.019                | 1.48                      | 0.109      | 2.2E-05         |              |
| IBS                         | Conserved                   | 0.03        | 0.51                 | 0.098                     | 19.61      | 3.761           | 1.2E-06      |
|                             | Conserved (extend 500)      | 0.33        | 0.82                 | 0.110                     | 2.47       | 0.331           | 8.8E-06      |
| IBD                         | Enhancer (extend 500)       | 0.15        | 0.71                 | 0.137                     | 4.64       | 0.888           | 5.7E-05      |
|                             | H3K27ac                     | 0.39        | 0.95                 | 0.100                     | 2.43       | 0.256           | 5.9E-10      |
|                             | H3K27ac (extend 500)        | 0.42        | 1.00                 | 0.108                     | 2.37       | 0.255           | 7.5E-09      |
|                             | H3K4me1 (extend 500)        | 0.61        | 1.03                 | 0.095                     | 1.69       | 0.156           | 4.0E-05      |
|                             | H3K4me3                     | 0.13        | 0.76                 | 0.178                     | 5.71       | 1.334           | 1.4E-04      |
|                             | Repressed (extend 500)      | 0.72        | 0.24                 | 0.085                     | 0.33       | 0.118           | 1.1E-10      |
|                             | Super Enhancer              | 0.17        | 0.54                 | 0.068                     | 3.20       | 0.404           | 9.0E-09      |
|                             | Super Enhancer (extend 500) | 0.17        | 0.62                 | 0.062                     | 3.64       | 0.362           | 7.7E-14      |

Supplementary Table 13. Results of partitioning SNP-based heritability analysis for PUD, GORD, PG<sub>M</sub>, IBS, IBD and PG<sub>M</sub> (sensitivity analysis after conditioning on other traits) by cell group functional annotations<sup>16</sup>. (see Fig. 5a)

| Trait                                                       | Category                | Prop. SNPs | Prop. h <sup>2</sup> | Prop. h <sup>2</sup> s.e. | Enrichment | Enrichment s.e. | Enrichment p |
|-------------------------------------------------------------|-------------------------|------------|----------------------|---------------------------|------------|-----------------|--------------|
| PUD                                                         | Adrenal Pancreas        | 0.09       | 0.36                 | 0.104                     | 3.83       | 1.108           | 1.2E-02      |
|                                                             | Central Nervous System  | 0.15       | 0.47                 | 0.109                     | 3.16       | 0.734           | 3.5E-03      |
|                                                             | Gastrointestinal        | 0.17       | 0.54                 | 0.129                     | 3.24       | 0.767           | 4.2E-03      |
|                                                             | Immune                  | 0.23       | 0.44                 | 0.122                     | 1.90       | 0.521           | 8.7E-02      |
|                                                             | Liver                   | 0.07       | 0.25                 | 0.084                     | 3.53       | 1.160           | 2.9E-02      |
| GORD                                                        | Adrenal Pancreas        | 0.09       | 0.26                 | 0.047                     | 2.81       | 0.504           | 5.2E-04      |
|                                                             | Central Nervous System* | 0.15       | 0.38                 | 0.046                     | 2.52       | 0.310           | 2.1E-06      |
|                                                             | Gastrointestinal        | 0.17       | 0.31                 | 0.053                     | 1.87       | 0.315           | 7.7E-03      |
|                                                             | Immune                  | 0.23       | 0.35                 | 0.056                     | 1.52       | 0.241           | 3.4E-02      |
|                                                             | Liver                   | 0.07       | 0.15                 | 0.034                     | 2.05       | 0.470           | 2.8E-02      |
| PG <sub>M</sub>                                             | Adrenal Pancreas        | 0.09       | 0.27                 | 0.037                     | 2.91       | 0.394           | 2.1E-06      |
|                                                             | Central Nervous System  | 0.15       | 0.41                 | 0.034                     | 2.75       | 0.230           | 2.2E-13      |
|                                                             | Gastrointestinal        | 0.17       | 0.30                 | 0.040                     | 1.79       | 0.237           | 1.2E-03      |
|                                                             | Immune                  | 0.23       | 0.39                 | 0.040                     | 1.65       | 0.171           | 1.9E-04      |
|                                                             | Liver                   | 0.07       | 0.16                 | 0.027                     | 2.22       | 0.374           | 1.2E-03      |
| IBS                                                         | Adrenal Pancreas        | 0.09       | 0.31                 | 0.085                     | 3.35       | 0.908           | 8.2E-03      |
|                                                             | Central Nervous System  | 0.15       | 0.55                 | 0.089                     | 3.70       | 0.596           | 7.8E-06      |
|                                                             | Gastrointestinal        | 0.17       | 0.31                 | 0.106                     | 1.84       | 0.631           | 1.8E-01      |
|                                                             | Immune                  | 0.23       | 0.39                 | 0.114                     | 1.67       | 0.487           | 1.6E-01      |
|                                                             | Liver                   | 0.07       | 0.20                 | 0.068                     | 2.82       | 0.936           | 5.0E-02      |
| IBD                                                         | Adrenal Pancreas        | 0.09       | 0.42                 | 0.105                     | 4.51       | 1.123           | 9.9E-04      |
|                                                             | Central Nervous System  | 0.15       | 0.34                 | 0.114                     | 2.28       | 0.767           | 8.9E-02      |
|                                                             | Gastrointestinal        | 0.17       | 0.73                 | 0.140                     | 4.37       | 0.833           | 3.3E-05      |
|                                                             | Immune                  | 0.23       | 1.00                 | 0.139                     | 4.30       | 0.596           | 5.7E-08      |
|                                                             | Liver                   | 0.07       | 0.24                 | 0.078                     | 3.26       | 1.078           | 3.6E-02      |
| PG <sub>M</sub> (Conditional on EA, BMI and smoking traits) | Adrenal Pancreas        | 0.09       | 0.28                 | 0.039                     | 3.04       | 0.42            | 2.4E-06      |
|                                                             | Central Nervous System  | 0.15       | 0.40                 | 0.037                     | 2.66       | 0.25            | 7.3E-11      |
|                                                             | Gastrointestinal        | 0.17       | 0.31                 | 0.046                     | 1.87       | 0.28            | 2.2E-03      |
|                                                             | Immune                  | 0.23       | 0.39                 | 0.051                     | 1.69       | 0.22            | 1.7E-03      |
|                                                             | Liver                   | 0.07       | 0.16                 | 0.032                     | 2.18       | 0.44            | 8.2E-03      |

\* Cells highlighted with yellow represent that tissue are still significant after Bonferroni correction.

Supplementary Table 14. Statistically significant results of partitioning SNP-based heritability of PG<sub>M</sub> and IBD to 205 tissues/cell types after Bonferroni correction and PG<sub>M</sub> (sensitivity analyses for 3 tissues after conditioning on other traits) using LDSC cell type specific expressed genes analysis<sup>17</sup>. (see **Fig. 5b**)

| Trait                                                       | Name                                   | Tissue category for figures | Coefficient | Coefficient s.e. | Coefficient P value | -log <sub>10</sub> (P) |
|-------------------------------------------------------------|----------------------------------------|-----------------------------|-------------|------------------|---------------------|------------------------|
| IBD                                                         | Leukocytes                             | Blood/Immune                | 4.1E-09     | 1.0E-09          | 2.4E-05             | 4.62                   |
|                                                             | Blood Cells                            |                             | 3.8E-09     | 9.7E-10          | 3.8E-05             | 4.42                   |
| PG <sub>M</sub>                                             | Brain Hippocampus                      | CNS                         | 2.5E-09     | 6.4E-10          | 5.8E-05             | 4.24                   |
|                                                             | Brain Frontal Cortex (BA9)             |                             | 2.3E-09     | 6.2E-10          | 7.2E-05             | 4.14                   |
|                                                             | Brain Anterior cingulate cortex (BA24) |                             | 2.4E-09     | 6.4E-10          | 1.0E-04             | 3.98                   |
| PG <sub>M</sub> (Conditional on EA, BMI and smoking traits) | Brain Anterior cingulate cortex (BA24) | CNS                         | 1.7E-09     | 5.9E-10          | 0.002               | 2.70                   |
|                                                             | Brain Frontal Cortex (BA9)             |                             | 1.6E-09     | 5.7E-10          | 0.002               | 2.70                   |
|                                                             | Brain Hippocampus                      |                             | 1.7E-09     | 5.7E-10          | 0.002               | 2.70                   |

Supplementary Table 15. Results of partitioning SNP-based heritability of five digestion phenotypes and PG+M (sensitivity analyses after conditioning on other traits) to final-scale GTEx brain expression data using LDSC cell type specific expressed genes analysis<sup>17</sup>. (see Fig. 5c)

| Trait                             | Name                              | Coefficient | Coefficient s.e. | Coefficient P value |
|-----------------------------------|-----------------------------------|-------------|------------------|---------------------|
| GORD                              | Cortex*                           | 2.1E-09     | 6.1E-10          | 3.7E-04             |
|                                   | Frontal Cortex (BA9)              | 1.4E-09     | 5.0E-10          | 2.2E-03             |
|                                   | Anterior cingulate cortex (BA24)  | 9.1E-10     | 5.0E-10          | 3.3E-02             |
|                                   | Cerebellum                        | 1.1E-09     | 6.5E-10          | 4.6E-02             |
|                                   | Cerebellar Hemisphere             | 7.3E-10     | 6.4E-10          | 1.3E-01             |
|                                   | Amygdala                          | -2.7E-11    | 5.8E-10          | 5.2E-01             |
|                                   | Hippocampus                       | -1.2E-10    | 5.1E-10          | 5.9E-01             |
|                                   | Caudate (basal ganglia)           | -1.5E-10    | 5.7E-10          | 6.0E-01             |
|                                   | Putamen (basal ganglia)           | -3.5E-10    | 5.6E-10          | 7.3E-01             |
|                                   | Substantia nigra                  | -4.9E-10    | 5.8E-10          | 8.0E-01             |
|                                   | Hypothalamus                      | -4.5E-10    | 5.2E-10          | 8.1E-01             |
|                                   | Nucleus accumbens (basal ganglia) | -5.0E-10    | 5.1E-10          | 8.4E-01             |
|                                   | Spinal cord (cervical c-1)        | -1.1E-09    | 5.8E-10          | 9.7E-01             |
| PG+M                              | Cortex                            | 3.1E-09     | 7.5E-10          | 2.3E-05             |
|                                   | Frontal Cortex (BA9)              | 2.2E-09     | 6.3E-10          | 2.4E-04             |
|                                   | Anterior cingulate cortex (BA24)  | 1.4E-09     | 6.4E-10          | 1.5E-02             |
|                                   | Cerebellum                        | 1.5E-09     | 7.9E-10          | 2.5E-02             |
|                                   | Cerebellar Hemisphere             | 1.3E-09     | 7.6E-10          | 4.7E-02             |
|                                   | Nucleus accumbens (basal ganglia) | 5.5E-10     | 6.6E-10          | 2.0E-01             |
|                                   | Caudate (basal ganglia)           | -8.9E-11    | 7.2E-10          | 5.5E-01             |
|                                   | Spinal cord (cervical c-1)        | -2.7E-10    | 7.6E-10          | 6.4E-01             |
|                                   | Amygdala                          | -3.8E-10    | 7.3E-10          | 7.0E-01             |
|                                   | Hippocampus                       | -5.6E-10    | 6.4E-10          | 8.1E-01             |
|                                   | Hypothalamus                      | -5.8E-10    | 6.3E-10          | 8.2E-01             |
|                                   | Substantia nigra                  | -1.0E-09    | 6.8E-10          | 9.3E-01             |
|                                   | Putamen (basal ganglia)           | -1.4E-09    | 6.7E-10          | 9.8E-01             |
| IBS                               | Cerebellum                        | 7.4E-10     | 5.3E-10          | 8.1E-02             |
|                                   | Frontal Cortex (BA9)              | 5.9E-10     | 4.5E-10          | 9.7E-02             |
|                                   | Cortex                            | 5.2E-10     | 5.1E-10          | 1.5E-01             |
|                                   | Cerebellar Hemisphere             | 2.9E-10     | 4.7E-10          | 2.6E-01             |
|                                   | Putamen (basal ganglia)           | 2.4E-10     | 4.8E-10          | 3.1E-01             |
|                                   | Hippocampus                       | 1.4E-10     | 4.6E-10          | 3.8E-01             |
|                                   | Anterior cingulate cortex (BA24)  | -8.3E-12    | 4.5E-10          | 5.1E-01             |
|                                   | Caudate (basal ganglia)           | -5.6E-11    | 4.4E-10          | 5.5E-01             |
|                                   | Amygdala                          | -2.8E-10    | 4.3E-10          | 7.4E-01             |
|                                   | Spinal cord (cervical c-1)        | -3.4E-10    | 4.2E-10          | 7.9E-01             |
| Nucleus accumbens (basal ganglia) | -3.6E-10                          | 4.3E-10     | 8.0E-01          |                     |

|                                                              |                                   |          |         |         |
|--------------------------------------------------------------|-----------------------------------|----------|---------|---------|
|                                                              | Substantia nigra                  | -6.5E-10 | 4.3E-10 | 9.3E-01 |
|                                                              | Hypothalamus                      | -1.0E-09 | 4.5E-10 | 9.9E-01 |
| PG.M<br>(Conditional<br>on EA, BMI<br>and smoking<br>traits) | Cortex                            | 2.6E-09  | 6.7E-10 | 4.2E-05 |
|                                                              | Frontal Cortex (BA9)              | 1.9E-09  | 6.0E-10 | 7.1E-04 |
|                                                              | Cerebellum                        | 1.9E-09  | 7.0E-10 | 4.0E-03 |
|                                                              | Anterior cingulate cortex (BA24)  | 1.3E-09  | 5.8E-10 | 1.5E-02 |
|                                                              | Cerebellar Hemisphere             | 9.2E-10  | 6.7E-10 | 8.5E-02 |
|                                                              | Nucleus accumbens (basal ganglia) | -1.9E-13 | 5.7E-10 | 5.0E-01 |
|                                                              | Amygdala                          | -1.9E-10 | 6.4E-10 | 6.2E-01 |
|                                                              | Spinal cord (cervical c-1)        | -3.5E-10 | 6.9E-10 | 6.9E-01 |
|                                                              | Hypothalamus                      | -3.6E-10 | 6.6E-10 | 7.1E-01 |
|                                                              | Caudate (basal ganglia)           | -5.6E-10 | 6.1E-10 | 8.2E-01 |
|                                                              | Hippocampus                       | -5.9E-10 | 6.2E-10 | 8.3E-01 |
|                                                              | Substantia nigra                  | -7.6E-10 | 6.0E-10 | 9.0E-01 |
|                                                              | Putamen (basal ganglia)           | -1.3E-09 | 5.6E-10 | 9.9E-01 |

\* Cells highlighted with yellow represent that tissue are still significant after Bonferroni correction.

Supplementary Table 16. Statistically significant results for the 3 digestion traits using GTEx and eQTLGen data and SMR analysis<sup>18</sup>.

| eQTL Data | Trait | Tissue           | Probe ID*          | Probe Chr. | Probe base pair position | Gene                 | Top SNP   | A1/A2 | Freq | P <sub>GWAS</sub> | P <sub>eQTL</sub> | b <sub>SMR</sub> | P <sub>SMR</sub> | P <sub>HEIDI</sub> | HEIDI pass |
|-----------|-------|------------------|--------------------|------------|--------------------------|----------------------|-----------|-------|------|-------------------|-------------------|------------------|------------------|--------------------|------------|
| GTEx      | PUD   | Stomach          | ENSG00000167653.4  | 8          | 143757934                | <i>PSCA</i>          | rs2976388 | A/G   | 0.42 | 1.8E-14           | 8.8E-41           | -0.12            | 3.0E-11          | 0.59               | Yes        |
|           |       |                  | ENSG00000176920.10 | 19         | 49204217                 | <i>FUT2</i>          | rs601338  | A/G   | 0.51 | 2.4E-15           | 2.8E-20           | -0.31            | 1.9E-09          | 0.89               | Yes        |
|           | IBD   | Colon Transverse | ENSG00000257582.1  | 10         | 101288520                | <i>RP11-129J12.2</i> | rs1548962 | C/G   | 0.51 | 9.7E-11           | 7.0E-22           | 0.20             | 7.9E-08          | 0.02               | Yes        |
| eQTL Gen  | PG.M  | Blood            | ENSG00000139531    | 12         | 56395694                 | <i>SUOX</i>          | rs1873914 | C/G   | 0.42 | 4.8E-08           | 0.0E+00           | 0.08             | 6.2E-08          | 0.74               | Yes        |
|           | IBD   |                  | ENSG00000224203    | 1          | 161507154                | <i>RPS23P10</i>      | rs9427403 | C/A   | 0.18 | 3.1E-08           | 0.0E+00           | 0.28             | 4.1E-08          | 0.06               | Yes        |

\* All listed results are significant after Bonferroni correction at  $P < 0.05/131,295$ .



Supplementary Table 17. Statistically significant results for PUD using blood mQTL data from McRae *et al.*<sup>19</sup> and SMR analysis<sup>18</sup>.

| mQTL Data                                              | Trait      | Probe ID*  | Probe Chr. | Probe base pair position | Top SNP    | A1/A2 | Freq    | P <sub>GWAS</sub> | P <sub>eQTL</sub> | b <sub>SMR</sub> | P <sub>SMR</sub> | P <sub>HEIDI</sub> | HEIDI pass |
|--------------------------------------------------------|------------|------------|------------|--------------------------|------------|-------|---------|-------------------|-------------------|------------------|------------------|--------------------|------------|
| Blood mQTL data from McRae <i>et al.</i> <sup>19</sup> | PUD        | cg08900798 | 11         | 1029938                  | rs59257210 | T/C   | 0.12    | 9.6E-10           | 8.6E-42           | -0.16            | 2.5E-08          | 0.06               | Yes        |
|                                                        | PUD        | cg01656853 | 19         | 49199172                 | rs633372   | G/A   | 0.47    | 1.2E-12           | 7.7E-56           | 0.16             | 9.6E-11          | 0.07               | Yes        |
|                                                        | PUD        | cg04660111 | 19         | 49199234                 | rs507855   | A/G   | 0.47    | 6.1E-12           | 1.5E-57           | 0.16             | 2.6E-10          | 0.05               | Yes        |
|                                                        | PUD        | cg08873673 | 19         | 49199217                 | rs2548459  | T/C   | 0.47    | 1.2E-12           | 1.8E-40           | 0.19             | 3.7E-10          | 0.19               | Yes        |
|                                                        | PUD        | cg11773468 | 19         | 49216319                 | rs12978752 | A/C   | 0.45    | 8.4E-11           | 9.5E-52           | -0.15            | 2.4E-09          | 0.04               | Yes        |
|                                                        | PUD        | cg15673069 | 19         | 49232542                 | rs838144   | T/C   | 0.50    | 1.8E-10           | 1.0E-40           | -0.17            | 8.6E-09          | 0.01               | Yes        |
|                                                        | PUD        | cg21653641 | 19         | 49222892                 | rs35866622 | C/T   | 0.50    | 7.4E-13           | 1.9E-16           | 0.31             | 6.4E-08          | 0.04               | Yes        |
|                                                        | PUD        | cg01652021 | 8          | 143851375                | rs4736300  | A/G   | 0.31    | 2.1E-07           | 4.5E-167          | 0.07             | 3.3E-07          | 0.08               | Yes        |
|                                                        | PUD        | cg09147065 | 8          | 143815906                | rs2257796  | C/T   | 0.48    | 1.0E-10           | 2.5E-16           | -0.27            | 3.9E-07          | 0.01               | Yes        |
|                                                        | PUD        | cg09552631 | 8          | 143763326                | rs2585183  | G/C   | 0.42    | 6.9E-14           | 4.3E-21           | -0.28            | 4.5E-09          | 0.19               | Yes        |
|                                                        | PUD        | cg14304364 | 8          | 143807962                | rs2164308  | T/C   | 0.49    | 1.4E-10           | 4.4E-20           | -0.24            | 1.4E-07          | 0.08               | Yes        |
|                                                        | PUD        | cg24023258 | 8          | 143781297                | rs2585175  | G/C   | 0.51    | 3.3E-10           | 1.5E-73           | -0.12            | 2.9E-09          | 0.03               | Yes        |
|                                                        | PUD        | cg11879188 | 9          | 136149908                | rs582094   | T/A   | 0.32    | 3.2E-09           | 2.1E-183          | -0.08            | 6.6E-09          | 0.59               | Yes        |
|                                                        | PUD        | cg13506600 | 9          | 136150361                | rs687621   | G/A   | 0.32    | 1.3E-09           | 1.5E-79           | -0.11            | 7.5E-09          | 0.26               | Yes        |
|                                                        | PUD        | cg13531387 | 9          | 136078657                | rs2769071  | G/A   | 0.32    | 3.0E-09           | 1.7E-38           | 0.15             | 6.9E-08          | 0.30               | Yes        |
|                                                        | PUD        | cg14271713 | 9          | 136153846                | rs529565   | C/T   | 0.32    | 2.7E-09           | 4.2E-45           | 0.14             | 4.2E-08          | 0.65               | Yes        |
|                                                        | PUD        | cg21160290 | 9          | 136149941                | rs554833   | T/C   | 0.32    | 3.6E-09           | 0.0E+00           | -0.05            | 4.4E-09          | 0.48               | Yes        |
| PUD                                                    | cg22535403 | 9          | 136150032  | rs554833                 | T/C        | 0.32  | 3.6E-09 | 0.0E+00           | -0.05             | 4.5E-09          | 0.37             | Yes                |            |
| PUD                                                    | cg24267699 | 9          | 136151359  | rs582094                 | T/A        | 0.32  | 3.2E-09 | 1.5E-162          | -0.08             | 7.2E-09          | 0.43             | Yes                |            |

\* All listed results are significant after Bonferroni correction at  $P < 0.05/92,715$ .

Supplementary Table 18. Results of gene sets enrichment analysis at FDR < 5% for each of PG<sub>+</sub>M and IBD using MAGMA<sup>20</sup>.

| Trait             | Gene sets name                            | No. of genes <sup>*</sup> | beta <sup>†</sup> | SE <sup>‡</sup> | P <sup>§</sup> | -log <sub>10</sub> (P) |
|-------------------|-------------------------------------------|---------------------------|-------------------|-----------------|----------------|------------------------|
| PG <sub>+</sub> M | GO POSTSYNAPSE                            | 582                       | 0.19              | 0.040           | 9.3E-07        | 6.03                   |
|                   | GO POSTSYNAPTIC MEMBRANE                  | 302                       | 0.24              | 0.057           | 1.3E-05        | 4.89                   |
|                   | GO SYNAPSE PART                           | 891                       | 0.13              | 0.032           | 1.6E-05        | 4.78                   |
|                   | GO SYNAPSE                                | 1116                      | 0.12              | 0.029           | 1.8E-05        | 4.75                   |
|                   | GO AXON PART                              | 358                       | 0.19              | 0.052           | 1.0E-04        | 4.00                   |
|                   | GO SYNAPTIC MEMBRANE                      | 404                       | 0.18              | 0.049           | 1.0E-04        | 4.00                   |
|                   | GO NEURON PROJECTION                      | 1233                      | 0.10              | 0.028           | 1.0E-04        | 3.98                   |
|                   | GO DENDRITIC TREE                         | 558                       | 0.15              | 0.041           | 1.1E-04        | 3.97                   |
|                   | GO NEURON PART                            | 1629                      | 0.09              | 0.024           | 1.4E-04        | 3.85                   |
|                   | GO GLUTAMATERGIC SYNAPSE                  | 331                       | 0.18              | 0.052           | 2.6E-04        | 3.58                   |
|                   | GO SOMATODENDRITIC COMPARTMENT            | 778                       | 0.11              | 0.035           | 4.4E-04        | 3.36                   |
| IBD               | GO MHC CLASS II PROTEIN COMPLEX           | 14                        | 1.27              | 0.290           | 6.4E-06        | 5.19                   |
|                   | GO MHC PROTEIN COMPLEX                    | 22                        | 0.85              | 0.203           | 1.5E-05        | 4.82                   |
|                   | GO SIDE OF MEMBRANE                       | 480                       | 0.17              | 0.043           | 5.8E-05        | 4.24                   |
|                   | GO LUMENAL SIDE OF MEMBRANE               | 29                        | 0.68              | 0.193           | 2.0E-04        | 3.70                   |
|                   | GO HOST CELL CYTOPLASM                    | 6                         | 1.52              | 0.433           | 2.3E-04        | 3.64                   |
|                   | GO ER TO GOLGI TRANSPORT VESICLE MEMBRANE | 56                        | 0.45              | 0.130           | 2.7E-04        | 3.58                   |

<sup>\*</sup> The number of genes in the gene-based summary statistics that are also in the gene sets.

<sup>†</sup> The regression coefficient of the gene set.

<sup>‡</sup> The standard error of the regression coefficient.

<sup>§</sup> The competitive gene set P value.

Supplementary Table 19. Number of cases and controls for the 4 digestion phenotypes and 8 depression phenotypes and 2 by 2 contingency table for number of cases and controls of each of the 32 digestion-depression phenotype pairs\*.

|             |        | GORD  |         | PUD   |         | IBS   |         | IBD  |         |
|-------------|--------|-------|---------|-------|---------|-------|---------|------|---------|
| GPpsy       |        | Case  | Control | Case  | Control | Case  | Control | Case | Control |
|             |        | 40514 | 305450  | 12194 | 333770  | 22138 | 323826  | 5263 | 340701  |
| Case        | 118966 | 18117 | 100849  | 5076  | 113890  | 12195 | 106771  | 1897 | 117069  |
| Control     | 226998 | 22397 | 204601  | 7118  | 219880  | 9943  | 217055  | 3366 | 223632  |
| Psypsy      |        | Case  | Control | Case  | Control | Case  | Control | Case | Control |
|             |        | 40646 | 306156  | 12227 | 334575  | 22218 | 324584  | 5268 | 341534  |
| Case        | 40262  | 6571  | 33691   | 2056  | 38206   | 4381  | 35881   | 689  | 39573   |
| Control     | 306540 | 34075 | 272465  | 10171 | 296369  | 17837 | 288703  | 4579 | 301961  |
| DepAll      |        | Case  | Control | Case  | Control | Case  | Control | Case | Control |
|             |        | 9458  | 74053   | 2672  | 80839   | 5096  | 78415   | 1167 | 82344   |
| Case        | 22414  | 3272  | 19142   | 875   | 21539   | 2162  | 20252   | 327  | 22087   |
| Control     | 61097  | 6186  | 54911   | 1797  | 59300   | 2934  | 58163   | 840  | 60257   |
| SelfRepDep  |        | Case  | Control | Case  | Control | Case  | Control | Case | Control |
|             |        | 36975 | 223316  | 11195 | 249096  | 19868 | 240423  | 4983 | 255308  |
| Case        | 19914  | 3624  | 16290   | 1052  | 18862   | 2543  | 17371   | 333  | 19581   |
| Control     | 240377 | 33351 | 207026  | 10143 | 230234  | 17325 | 223052  | 4650 | 235727  |
| ICD10Dep    |        | Case  | Control | Case  | Control | Case  | Control | Case | Control |
|             |        | 38095 | 232382  | 11536 | 258941  | 20032 | 250445  | 5052 | 265425  |
| Case        | 9947   | 2424  | 7523    | 804   | 9143    | 1461  | 8486    | 249  | 9698    |
| Control     | 260530 | 35671 | 224859  | 10732 | 249798  | 18571 | 241959  | 4803 | 255727  |
| LifetimeMDD |        | Case  | Control | Case  | Control | Case  | Control | Case | Control |
|             |        | 6614  | 60205   | 1763  | 65056   | 3749  | 63070   | 865  | 65954   |
| Case        | 16945  | 2252  | 14693   | 527   | 16418   | 1717  | 15228   | 264  | 16681   |
| Control     | 49874  | 4362  | 45512   | 1236  | 48638   | 2032  | 47842   | 601  | 49273   |
| MDDRecur    |        | Case  | Control | Case  | Control | Case  | Control | Case | Control |
|             |        | 5790  | 54207   | 1560  | 58437   | 3167  | 56830   | 766  | 59231   |
| Case        | 10216  | 1437  | 8779    | 330   | 9886    | 1144  | 9072    | 166  | 10050   |
| Control     | 49781  | 4353  | 45428   | 1230  | 48551   | 2023  | 47758   | 600  | 49181   |
| GPNoDep     |        | Case  | Control | Case  | Control | Case  | Control | Case | Control |
|             |        | 6150  | 54652   | 1786  | 59016   | 2905  | 57897   | 834  | 59968   |
| Case        | 9066   | 1289  | 7777    | 341   | 8725    | 813   | 8253    | 132  | 8934    |
| Control     | 51736  | 4861  | 46875   | 1445  | 50291   | 2092  | 49644   | 702  | 51034   |

\* Cells with blue colour represent eight depression phenotypes following definition of Cai *et al.*<sup>21</sup> and corresponding number of cases and controls and cells with orange colour represent four digestion phenotypes and corresponding number of cases and controls. Cells with red colour represent the number of overlapped cases and controls for each of 32 digestion-depression phenotype pairs.

Abbreviation: Seen general practice (GP) for nerves, anxiety, tension or depression (GPpsy); Seen psychiatrist for nerves, anxiety, tension or depression (Psypsy); Probable recurrent major depression or single probable major depression episode (DepAll); Self-reported depression (SelfRepDep); ICD10 defined depression (ICD10Dep); DSM-V clinical guideline defined major depression (LifetimeMDD); Major depression recurrence (MDDRecur); Seen GP for depression but no cardinal symptoms (GPNoDep); Peptic ulcer disease (PUD); Gastro-oesophageal reflux disease (GORD); Irritable bowel syndrome (IBS) and Inflammatory bowel disease (IBD).

Supplementary Table 20. Results of odds ratio and corresponding P value from 2 by 2 contingency table (**Supplementary Table 19**) of each of the 32 digestion-depression phenotype pairs using fmsb R package<sup>22</sup>.

| Depression phenotypes | Digestion phenotypes | Beta  | s.e.  | P       | OR   | CIL* | CIU* |
|-----------------------|----------------------|-------|-------|---------|------|------|------|
| GPpsy                 | PUD                  | 0.32  | 0.019 | 0.0E+00 | 1.38 | 1.33 | 1.43 |
| GPpsy                 | GORD                 | 0.50  | 0.011 | 0.0E+00 | 1.64 | 1.61 | 1.68 |
| GPpsy                 | IBS                  | 0.91  | 0.014 | 0.0E+00 | 2.49 | 2.43 | 2.56 |
| GPpsy                 | IBD                  | 0.07  | 0.029 | 1.1E-02 | 1.08 | 1.02 | 1.14 |
| Psypsy                | PUD                  | 0.45  | 0.025 | 0.0E+00 | 1.57 | 1.49 | 1.65 |
| Psypsy                | GORD                 | 0.44  | 0.015 | 0.0E+00 | 1.56 | 1.52 | 1.60 |
| Psypsy                | IBS                  | 0.68  | 0.018 | 0.0E+00 | 1.98 | 1.91 | 2.05 |
| Psypsy                | IBD                  | 0.14  | 0.041 | 7.9E-04 | 1.15 | 1.06 | 1.24 |
| DepAll                | PUD                  | 0.29  | 0.042 | 2.5E-12 | 1.34 | 1.23 | 1.46 |
| DepAll                | GORD                 | 0.42  | 0.023 | 0.0E+00 | 1.52 | 1.45 | 1.59 |
| DepAll                | IBS                  | 0.75  | 0.029 | 0.0E+00 | 2.12 | 2.00 | 2.24 |
| DepAll                | IBD                  | 0.06  | 0.066 | 3.6E-01 | 1.06 | 0.93 | 1.21 |
| SelfRepDep            | PUD                  | 0.24  | 0.033 | 1.2E-12 | 1.27 | 1.19 | 1.35 |
| SelfRepDep            | GORD                 | 0.32  | 0.019 | 0.0E+00 | 1.38 | 1.33 | 1.43 |
| SelfRepDep            | IBS                  | 0.63  | 0.023 | 0.0E+00 | 1.88 | 1.80 | 1.97 |
| SelfRepDep            | IBD                  | -0.15 | 0.057 | 9.4E-03 | 0.86 | 0.77 | 0.96 |
| ICD10Dep              | PUD                  | 0.72  | 0.038 | 0.0E+00 | 2.05 | 1.90 | 2.21 |
| ICD10Dep              | GORD                 | 0.71  | 0.024 | 0.0E+00 | 2.03 | 1.94 | 2.13 |
| ICD10Dep              | IBS                  | 0.81  | 0.029 | 0.0E+00 | 2.24 | 2.12 | 2.38 |
| ICD10Dep              | IBD                  | 0.31  | 0.066 | 1.8E-06 | 1.37 | 1.20 | 1.56 |
| LifetimeMDD           | PUD                  | 0.23  | 0.053 | 9.3E-06 | 1.26 | 1.14 | 1.40 |
| LifetimeMDD           | GORD                 | 0.47  | 0.028 | 0.0E+00 | 1.60 | 1.51 | 1.69 |
| LifetimeMDD           | IBS                  | 0.98  | 0.034 | 0.0E+00 | 2.65 | 2.48 | 2.84 |
| LifetimeMDD           | IBD                  | 0.26  | 0.074 | 4.5E-04 | 1.30 | 1.12 | 1.50 |
| MDDRecur              | PUD                  | 0.28  | 0.063 | 1.1E-05 | 1.32 | 1.16 | 1.49 |
| MDDRecur              | GORD                 | 0.54  | 0.033 | 0.0E+00 | 1.71 | 1.60 | 1.82 |
| MDDRecur              | IBS                  | 1.09  | 0.039 | 0.0E+00 | 2.98 | 2.76 | 3.21 |
| MDDRecur              | IBD                  | 0.30  | 0.088 | 5.8E-04 | 1.35 | 1.14 | 1.61 |
| GPNoDep               | PUD                  | 0.31  | 0.061 | 4.7E-07 | 1.36 | 1.21 | 1.53 |
| GPNoDep               | GORD                 | 0.47  | 0.034 | 0.0E+00 | 1.60 | 1.50 | 1.71 |
| GPNoDep               | IBS                  | 0.85  | 0.043 | 0.0E+00 | 2.34 | 2.15 | 2.54 |
| GPNoDep               | IBD                  | 0.07  | 0.096 | 4.5E-01 | 1.07 | 0.89 | 1.30 |

\* CIL and CIU represent the lower and upper value for 95% confidence interval (CI), respectively.

Abbreviation: Seen general practice (GP) for nerves, anxiety, tension or depression (GPpsy); Seen psychiatrist for nerves, anxiety, tension or depression (Psypsy); Probable recurrent major depression or single probable major depression episode (DepAll); Self-reported depression (SelfRepDep); ICD10 defined depression (ICD10Dep); DSM-V clinical guideline defined major depression (LifetimeMDD); Major depression recurrence (MDDRecur); Seen GP for depression but no cardinal symptoms (GPNoDep); Peptic ulcer disease (PUD); Gastro-oesophageal reflux disease (GORD); Irritable bowel syndrome (IBS) and Inflammatory bowel disease (IBD).

Supplementary Table 21. Results of investigating the causality hypothesis between major depression and five digestion phenotypes using Generalised Summary-data-based Mendelian Randomisation<sup>23</sup>. (GSMR, see Fig. 6b)

| Trait1           | Trait2 | Direction Trait1 -> Trait 2* |       |         |             | Direction Trait2 -> Trait 1† |       |         |                |                        |
|------------------|--------|------------------------------|-------|---------|-------------|------------------------------|-------|---------|----------------|------------------------|
|                  |        | $b_{xy}‡$                    | se    | p       | No. of SNPs | $b_{xy}‡$                    | se    | p       | No. of SNPs    | Significance threshold |
| Major depression | PUD    | 0.18                         | 0.063 | 3.9E-03 | 33          | 0.01 <sup>§</sup>            | 0.020 | 8.0E-01 | 13             | 5.0E-07                |
|                  |        |                              |       |         |             | 0.018                        | 0.023 | 4.4E-01 | 8 <sup>#</sup> | 5.0E-08                |
| Major depression | GORD   | 0.21                         | 0.038 | 2.2E-08 | 32          | 0.18                         | 0.036 | 7.3E-07 | 17             | 5.0E-07                |
| Major depression | PG+M   | 0.24                         | 0.030 | 2.5E-15 | 33          | 0.23                         | 0.038 | 2.7E-09 | 18             | 5.0E-08                |
| Major depression | IBS    | 0.39                         | 0.050 | 6.4E-15 | 33          | 0.11                         | 0.033 | 8.9E-04 | 12             | 2.0E-06                |
| Major depression | IBD    | 0.08                         | 0.097 | 4.0E-01 | 33          | 0.01                         | 0.008 | 1.1E-01 | 31             | 5.0E-08                |

\* The direction represents using trait 1 as exposure to investigate the causality hypothesis on trait 2.

† The direction represents using trait 2 as exposure to investigate the causality hypothesis on trait 1.

‡ The unit represents per standard deviation change in liability to the exposure trait.

§ Yellow highlighted cells indicate use of a relaxed significance threshold for genetic instrument inclusion in the Trait2 -> Trait1 analysis, specified in the significance threshold column.

# Given the unidirectional statistically significant GSMR results between major depression and PUD (i.e., Major depression -> PUD) and relaxed significance threshold for the reverse direction (PUD -> Major depression) to obtain SNPs > 10, we also conducted GSMR analyses using 8 genome-wide significant SNPs for PUD. It remains unidirectional statistically significant for GSMR between major depression and PUD, suggesting that major depression is putatively causal for PUD. This analyses should be revisited when we have more genome-wide significant SNPs for PUD.

Supplementary Table 22. Results of investigating the causality hypothesis between major depression (MD) and PG<sub>+</sub>M using different Mendelian Randomization (MR) methods.

| Exposure          | Outcome           | Method                    | No. of SNPs | b*   | se   | P                    | Egger intercept (se) | Egger intercept P |
|-------------------|-------------------|---------------------------|-------------|------|------|----------------------|----------------------|-------------------|
| MD                | PG <sub>+</sub> M | Inverse variance weighted | 34          | 0.24 | 0.03 | 1.9E-12              | -                    | -                 |
| MD                | PG <sub>+</sub> M | MR Egger                  | 34          | 0.10 | 0.14 | 4.8E-01              | 0.005 (0.005)        | 2.8E-1            |
| MD                | PG <sub>+</sub> M | Weighted median           | 34          | 0.23 | 0.05 | 3.2E-07              | -                    | -                 |
| MD                | PG <sub>+</sub> M | MR-PRESSO                 | 34          | 0.24 | 0.03 | 4.7E-08 <sup>†</sup> | -                    | -                 |
| PG <sub>+</sub> M | MD                | Inverse variance weighted | 19          | 0.23 | 0.05 | 2.5E-06              | -                    | -                 |
| PG <sub>+</sub> M | MD                | MR Egger                  | 19          | 0.01 | 0.23 | 9.6E-01              | 0.008 (0.008)        | 3.4E-1            |
| PG <sub>+</sub> M | MD                | Weighted median           | 19          | 0.19 | 0.06 | 1.9E-03              | -                    | -                 |
| PG <sub>+</sub> M | MD                | MR-PRESSO                 | 19          | 0.23 | 0.05 | 1.8E-04 <sup>†</sup> | -                    | -                 |

\* The beta is the original value from the corresponding MR analysis. The unit represents per standard deviation change in liability to the exposure trait.

<sup>†</sup> No MR-PRESSO (Pleiotropy Residual Sum and Outlier) outliers were detected.

Abbreviation: MR: mendelian randomization; PG<sub>+</sub>M: phenotype for peptic ulcer disease, gastro-oesophageal reflux disease with the combination of taking corresponding medications/treatments.

Supplementary Table 23. Results for the relationship between major depression (MD) and PG+M after controlling EA, BMI and smoking-related traits using Generalised Summary-data-based Mendelian Randomisation (GSMR) analyses<sup>23</sup>.

| Exposure trait | Outcome trait | Conditional trait(s) for exposure trait                                                   | $b_{xy}^*$ | $SE_{xy}$ | P       | No. of SNPs    |
|----------------|---------------|-------------------------------------------------------------------------------------------|------------|-----------|---------|----------------|
| MD             | PG+M          | EA                                                                                        | 0.22       | 0.03      | 2.7e-13 | 32             |
|                |               | BMI                                                                                       | 0.27       | 0.04      | 3.6e-14 | 26             |
|                |               | Smoking (Age of Initiation, Cigarettes Per Day, Smoking Cessation and Smoking Initiation) | 0.24       | 0.03      | 2.7e-15 | 33             |
|                |               | EA + BMI + Smoking                                                                        | 0.26       | 0.04      | 4.4e-13 | 25             |
| PG+M           | MD            | EA                                                                                        | 0.15       | 0.05      | 2.5e-03 | 11             |
|                |               | BMI                                                                                       | 0.20       | 0.04      | 7.9e-07 | 16             |
|                |               | Smoking (Age of Initiation, Cigarettes Per Day, Smoking Cessation and Smoking Initiation) | 0.23       | 0.04      | 2.7e-09 | 18             |
|                |               | EA + BMI + Smoking                                                                        | 0.19       | 0.05      | 4.7e-04 | 9 <sup>†</sup> |

\* The unit represents per standard deviation change in liability to the exposure trait.

<sup>†</sup> GSMR requires at least 10 SNPs as genetic instrument for exposure. After controlling for EA, BMI and smoking-related traits, only 9 SNPs retained, we used these 9 SNPs as genetic instrument rather than relaxing the significance threshold to obtain more SNPs.

Supplementary Table 24. LCV<sup>8</sup> results for the relationship between PG+M (trait 1) and major depression (MD) (trait 2).

| LCV output            | Value                                             | Meaning                                                                                                         |
|-----------------------|---------------------------------------------------|-----------------------------------------------------------------------------------------------------------------|
| zscore                | -1.17                                             | Z score for partial genetic causality. zscore>>0 implies gcp>0                                                  |
| pval.gcpzero.2tailed* | 0.24                                              | 2-tailed p-value for null that gcp=0                                                                            |
| gcp.pm                | -0.11                                             | genetic causality proportion (gcp)<br>posterior mean gcp (gcp=1: trait 1 -> trait 2; gcp=-1: trait 2-> trait 1) |
| gcp.pse               | 0.09                                              | posterior standard error for gcp                                                                                |
| rho.est               | 0.43                                              | estimated genetic correlation                                                                                   |
| rho.err               | 0.03                                              | standard error of rho estimate                                                                                  |
| pval.fullycausal*     | 3.5E-46 for MD -> PG+M and 8.1E-26 for PG+M -> MD | [2 entries], p-values for null that gcp=1 or that gcp=-1, respectively                                          |
| h2.zscore             | 34.1 for PG+M and 33.6 for MD                     | [2 entries], z scores for trait 1 and trait 2 being heritable, respectively                                     |

\* Since pval.gcpzero.2tailed is non-significant and pval.fullycausal is significant in both directions these results provide no evidence for causal directional relationships.



Supplementary Table 25. Genetic correlation estimates between major depression and each of the five GI-DepComRMV phenotypes from bivariate LD score regression analysis<sup>15</sup>.

| Trait1                | Trait2         | No. of Case | No. of Control | rg    | se     | p       |
|-----------------------|----------------|-------------|----------------|-------|--------|---------|
| Major depression 2018 | PUD            | 16666       | 439661         | 0.37  | 0.045  | 2.1E-16 |
|                       | PUD-DepComRMV  | 9345        | 279469         | 0.24  | 0.050  | 2.1E-6  |
|                       | GORD           | 54854       | 401473         | 0.37  | 0.027  | 3.3E-41 |
|                       | GORD-DepComRMV | 29090       | 259724         | 0.29  | 0.036  | 4.1E-16 |
|                       | PG+M           | 90175       | 366152         | 0.43  | 0.024  | 1.4E-74 |
|                       | PG+M-DepComRMV | 48180       | 240634         | 0.34  | 0.029  | 8.6E-29 |
|                       | IBS            | 28518       | 426803         | 0.49  | 0.042  | 1.1E-31 |
|                       | IBS-DepComRMV  | 12033       | 276269         | 0.37  | 0.066  | 1.6E-8  |
|                       | IBD            | 7045        | 449282         | 0.15  | 0.043  | 0.0003  |
| IBD-DepComRMV         | 4272           | 284542      | 0.18           | 0.057 | 0.0018 |         |

Supplementary Table 26. Results of investigating the causality hypothesis between major depression and each of the five GI-DepComRMV phenotypes using Generalised Summary-data-based Mendelian Randomisation<sup>23</sup> (GSMR).

| Trait1           | Direction Trait1 -> Trait 2 Original Phenotype* |           |       |         |             | Direction Trait1 -> Trait 2 Sensitivity Phenotype† |           |       |        |             |
|------------------|-------------------------------------------------|-----------|-------|---------|-------------|----------------------------------------------------|-----------|-------|--------|-------------|
|                  | Trait2 Original Phenotype                       | $b_{xy}‡$ | se    | p       | No. of SNPs | Trait2 Sensitivity Phenotype                       | $b_{xy}‡$ | se    | p      | No. of SNPs |
| Major depression | PUD                                             | 0.18      | 0.063 | 3.9E-03 | 33          | PUD-DepComRMV                                      | 0.08      | 0.084 | 0.366  | 33          |
| Major depression | GORD                                            | 0.21      | 0.038 | 2.2E-08 | 32          | GORD-DepComRMV                                     | 0.25      | 0.050 | 8.3E-7 | 33          |
| Major depression | PG+M                                            | 0.24      | 0.030 | 2.5E-15 | 33          | PG.M-DepComRMV                                     | 0.20      | 0.040 | 6.1E-7 | 33          |
| Major depression | IBS                                             | 0.39      | 0.050 | 6.4E-15 | 33          | IBS-DepComRMV                                      | 0.36      | 0.076 | 2.3E-6 | 33          |
| Major depression | IBD                                             | 0.08      | 0.097 | 4.0E-01 | 33          | IBD-DepComRMV                                      | 0.12      | 0.124 | 0.342  | 33          |

\* The direction represents using trait 1 as exposure to investigate the causality hypothesis on trait 2 original phenotype.

† The direction represents using trait 1 as exposure to investigate the causality hypothesis on trait 2 sensitivity phenotype.

‡ The unit represents per standard deviation change in liability to the exposure trait.

Supplementary Table 27. Results of investigating the causality hypothesis between major depression and eight PUD sensitivity phenotypes using Generalised Summary-data-based Mendelian Randomisation<sup>23</sup> (GSMR).

| Trait1           | Direction Trait1 -> Trait 2* |              |                 |                    |       |         |             |
|------------------|------------------------------|--------------|-----------------|--------------------|-------|---------|-------------|
|                  | Trait2                       | No. of cases | No. of Controls | $b_{xy}^{\dagger}$ | se    | p       | No. of SNPs |
| Major depression | PUD                          | 16666        | 439661          | 0.18               | 0.063 | 3.9E-03 | 33          |
| Major depression | PUD-GPpsyRMV                 | 9790         | 290105          | 0.09               | 0.083 | 0.30    | 33          |
| Major depression | PUD-PspsyRMV                 | 13867        | 390048          | 0.17               | 0.070 | 0.018   | 33          |
| Major depression | PUD-DepAlIRMV                | 15533        | 411862          | 0.20               | 0.066 | 0.002   | 33          |
| Major depression | PUD-SelfRepDepRMV            | 15235        | 414915          | 0.17               | 0.067 | 0.010   | 33          |
| Major depression | PUD-ICD10DepRMV              | 15566        | 427451          | 0.18               | 0.066 | 0.008   | 33          |
| Major depression | PUD-LifetimeMddRMV           | 15972        | 418474          | 0.18               | 0.066 | 0.005   | 33          |
| Major depression | PUD-MddRecurRMV              | 16227        | 426918          | 0.17               | 0.065 | 0.008   | 33          |
| Major depression | PUD-GPNoDepRMV               | 16196        | 428425          | 0.18               | 0.065 | 0.008   | 33          |

\* The direction represents using trait 1 as exposure to investigate the causality hypothesis on trait 2.

† The unit represents per standard deviation change in liability to the exposure trait.

Supplementary Table 28. Polygenic score for major depression\* predicts PG+M (peptic ulcer disease (PUD), gastro-oesophageal reflux disease (GORD) in combination with medications/treatments for PUD and GORD) risk using logistic regression model.

| Clumping Range | Sample Prevalence (P) | Sample Size (N) | P value of case-control polygenic score difference | AUC   | ORD <sub>10</sub> <sup>†</sup> | ORD <sub>10</sub> CI <sup>‡</sup> |
|----------------|-----------------------|-----------------|----------------------------------------------------|-------|--------------------------------|-----------------------------------|
| 0-5.0E-08      | 0.198                 | 456327          | 4.7E-13                                            | 0.508 | 1.08                           | 1.05-1.12                         |
| 0-1.0E-05      |                       |                 | 1.5E-45                                            | 0.515 | 1.19                           | 1.15-1.23                         |
| 0-1.0E-04      |                       |                 | 2.6E-63                                            | 0.517 | 1.26                           | 1.22-1.30                         |
| 0-1.0E-03      |                       |                 | 4.0E-89                                            | 0.521 | 1.30                           | 1.26-1.34                         |
| 0-1.0E-02      |                       |                 | 2.2E-118                                           | 0.525 | 1.33                           | 1.29-1.38                         |
| 0-5.0E-02      |                       |                 | 3.0E-87                                            | 0.521 | 1.29                           | 1.25-1.34                         |
| 0-1.0E-01      |                       |                 | 1.6E-93                                            | 0.522 | 1.29                           | 1.25-1.33                         |
| 0-5.0E-01      |                       |                 | 8.6E-87                                            | 0.521 | 1.26                           | 1.22-1.30                         |

\* The GWAS summary statistics data for major depression are from Wray *et al.*<sup>24</sup> (European ancestry and UK Biobank participants were excluded).

<sup>†</sup> The odds ratio of PG+M risk for participants with polygenic score at 10<sup>th</sup> decile compared with participants with polygenic score at 1<sup>st</sup> decile.

<sup>‡</sup> 95% confidence interval for the odds ratio at 10<sup>th</sup> decile.

Supplementary Table 29. Summary statistics for UKB peptic ulcer diseases genome-wide associated significant SNPs ( $P < 5e-8$ ) after mtCOJO analyses<sup>23</sup> conditional on UKB gastro-oesophageal reflux diseases GWAS summary statistics ( $P < 5e-8$ ).

| Trait | SNP         | CHR. | BP        | A1/A2 | A1 frequency | UKB original statistics for PUD |         | UKB original statistics for GORD |        | UKB statistics after mtCOJO analyses <sup>23</sup> on GORD GWAS summary statistics |         |
|-------|-------------|------|-----------|-------|--------------|---------------------------------|---------|----------------------------------|--------|------------------------------------------------------------------------------------|---------|
|       |             |      |           |       |              | OR*                             | P       | OR*                              | P      | OR*                                                                                | P       |
| PUD   | rs681343    | 19   | 49206462  | C/T   | 0.49         | 0.92                            | 1.9E-15 | 1.00                             | 7.8E-1 | 0.91                                                                               | 8.6E-16 |
|       | rs2976388   | 8    | 143760256 | G/A   | 0.58         | 1.09                            | 1.8E-14 | 1.02                             | 2.3E-4 | 1.08                                                                               | 1.2E-12 |
|       | rs10500661  | 11   | 6273744   | T/C   | 0.80         | 0.90                            | 4.1E-14 | 0.98                             | 2.1E-3 | 0.91                                                                               | 1.4E-12 |
|       | rs147048677 | 1    | 155161794 | C/T   | 0.94         | 0.86                            | 9.0E-12 | 1.00                             | 7.6E-1 | 0.86                                                                               | 9.8E-12 |
|       | rs78459074  | 11   | 1029905   | A/G   | 0.89         | 1.12                            | 2.6E-10 | 0.99                             | 1.6E-1 | 1.13                                                                               | 4.4E-11 |
|       | rs34074411  | 17   | 39867248  | C/T   | 0.56         | 0.93                            | 2.6E-10 | 1.00                             | 7.4E-1 | 0.93                                                                               | 1.4E-10 |
|       | rs687621    | 9    | 136137065 | A/G   | 0.68         | 1.08                            | 1.3E-09 | 1.00                             | 2.6E-1 | 1.07                                                                               | 3.0E-09 |
|       | rs9581957   | 13   | 28557889  | C/T   | 0.68         | 0.93                            | 3.6E-09 | 1.00                             | 7.2E-1 | 0.93                                                                               | 2.0E-09 |

\* Odds ratio (OR) is for risk of A1 allele compared to A2 allele.

**Supplementary Figures**

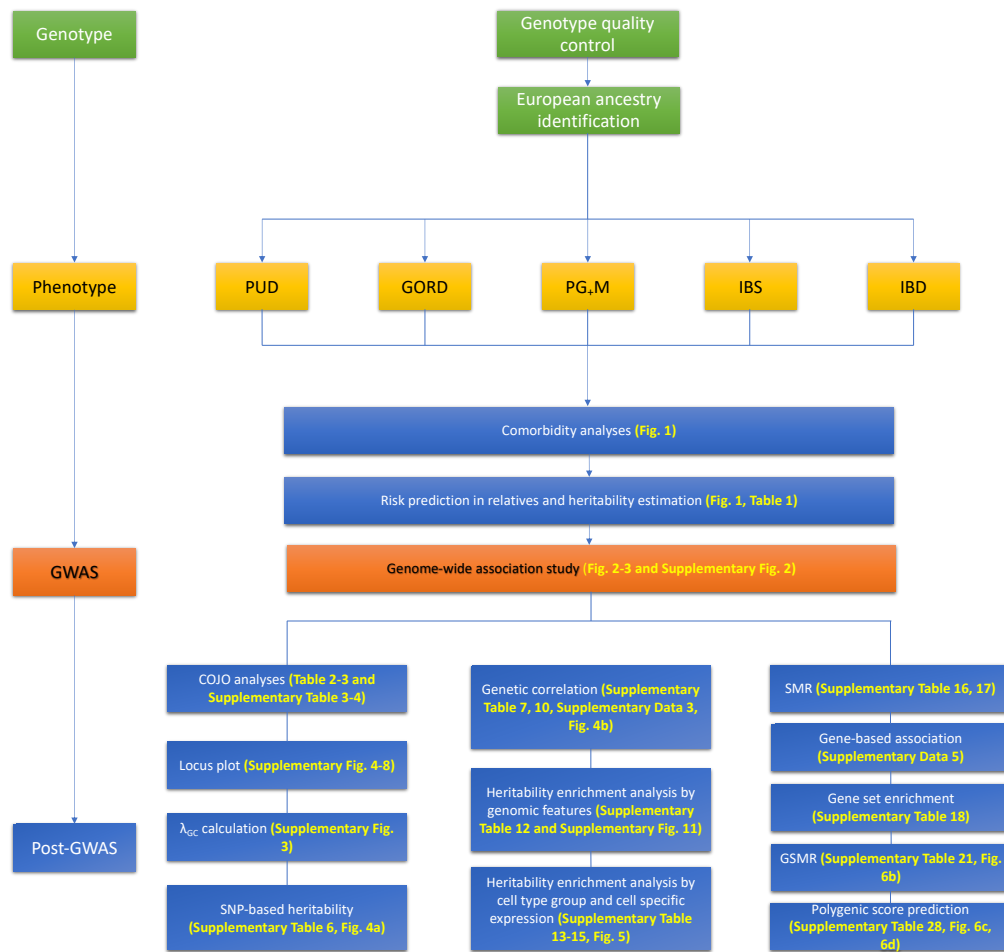

**Supplementary Fig. 1.** Full workflow of the study.

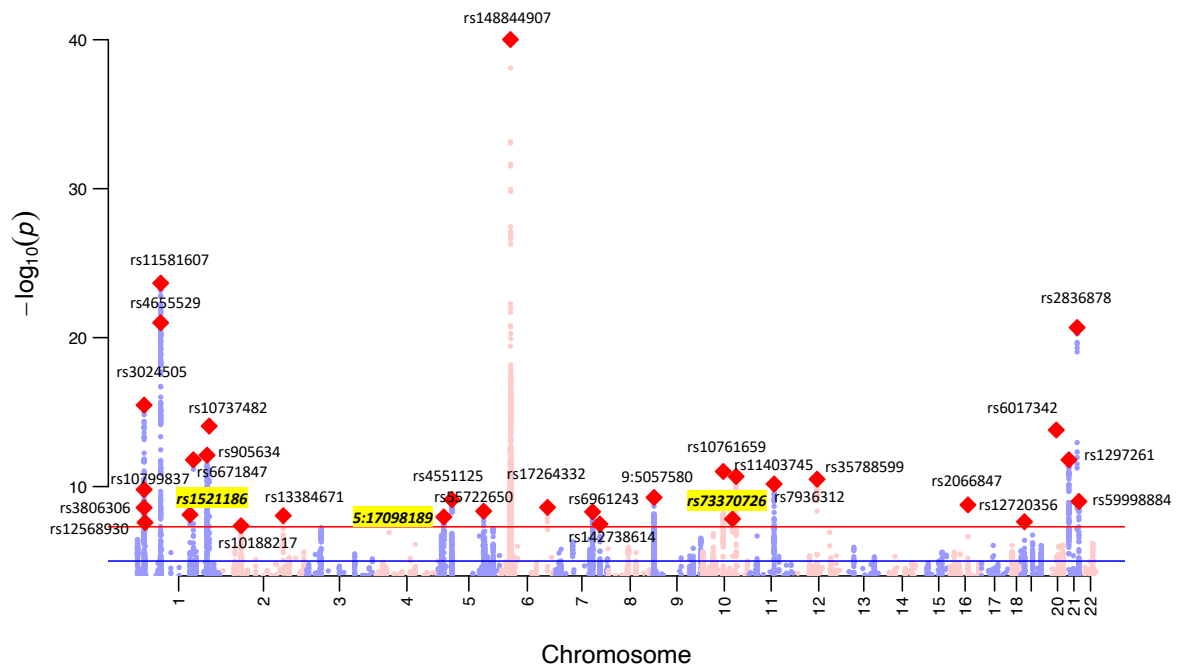

**Supplementary Fig. 2.** Manhattan plot for IBD. SNPs with red diamond represent genome-wide statistically significant independent loci ( $P < 5.0E-8$ ) for each trait. SNPs highlighted with yellow colour, bold and italic font represent loci that haven't been reported to be associated with IBD.

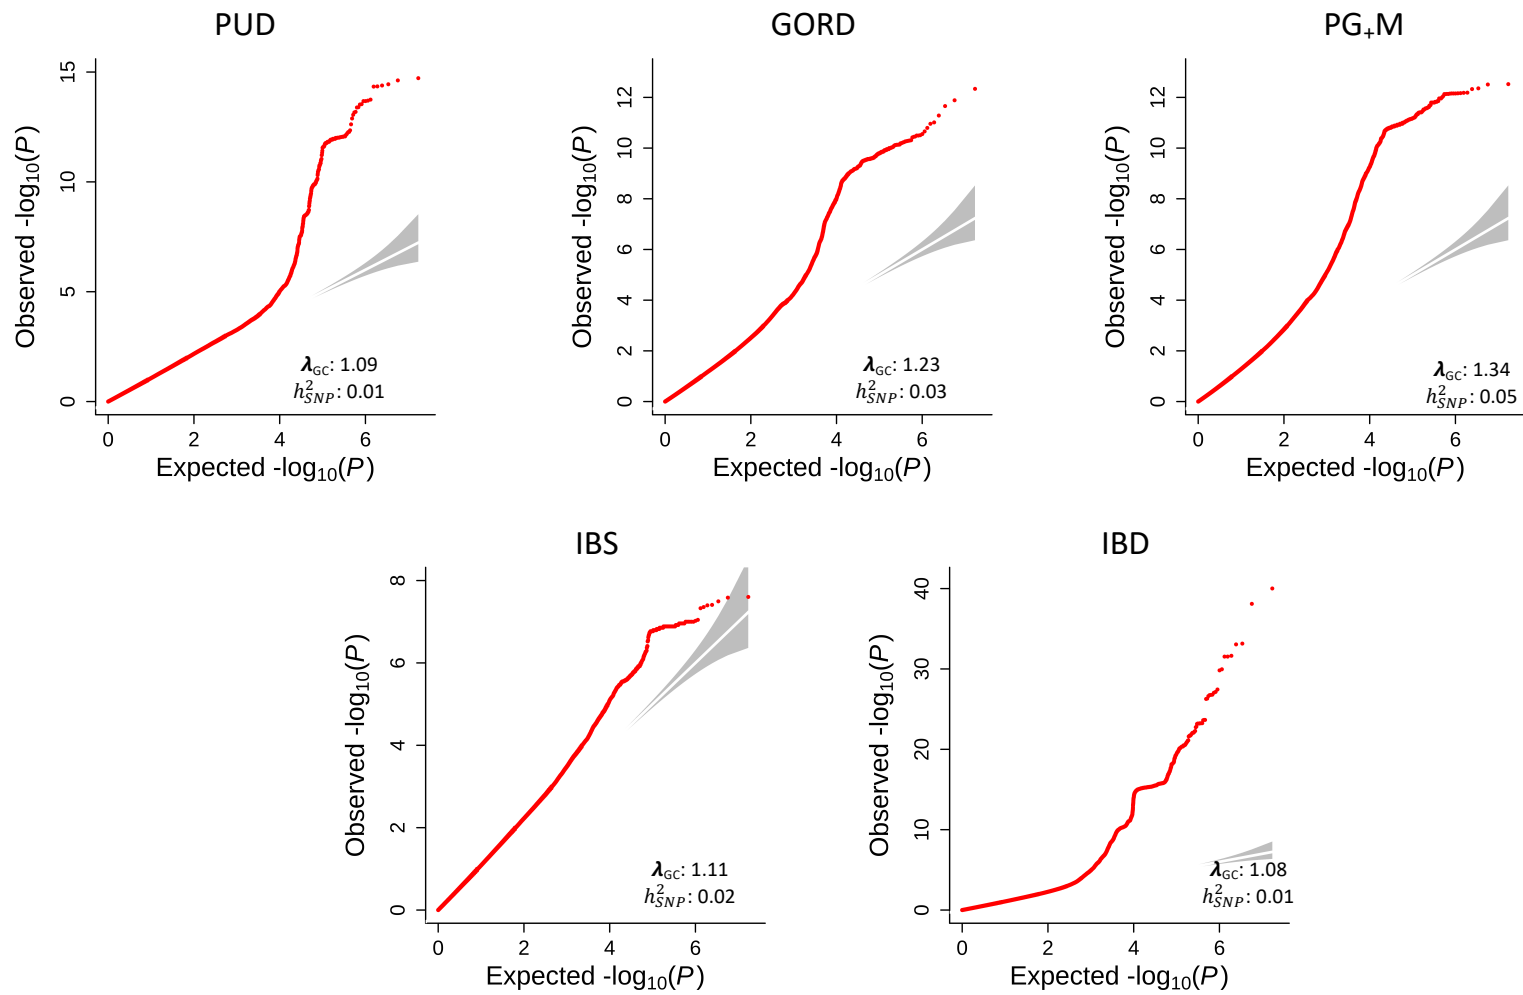

**Supplementary Fig. 3.** Quantile-Quantile (Q-Q) plots for the five digestion phenotypes. The  $\lambda_{GC}$  is directly calculated using median  $\chi^2$  on all the SNPs divided by 0.455 (the median  $\chi^2$  expected under the null hypothesis).



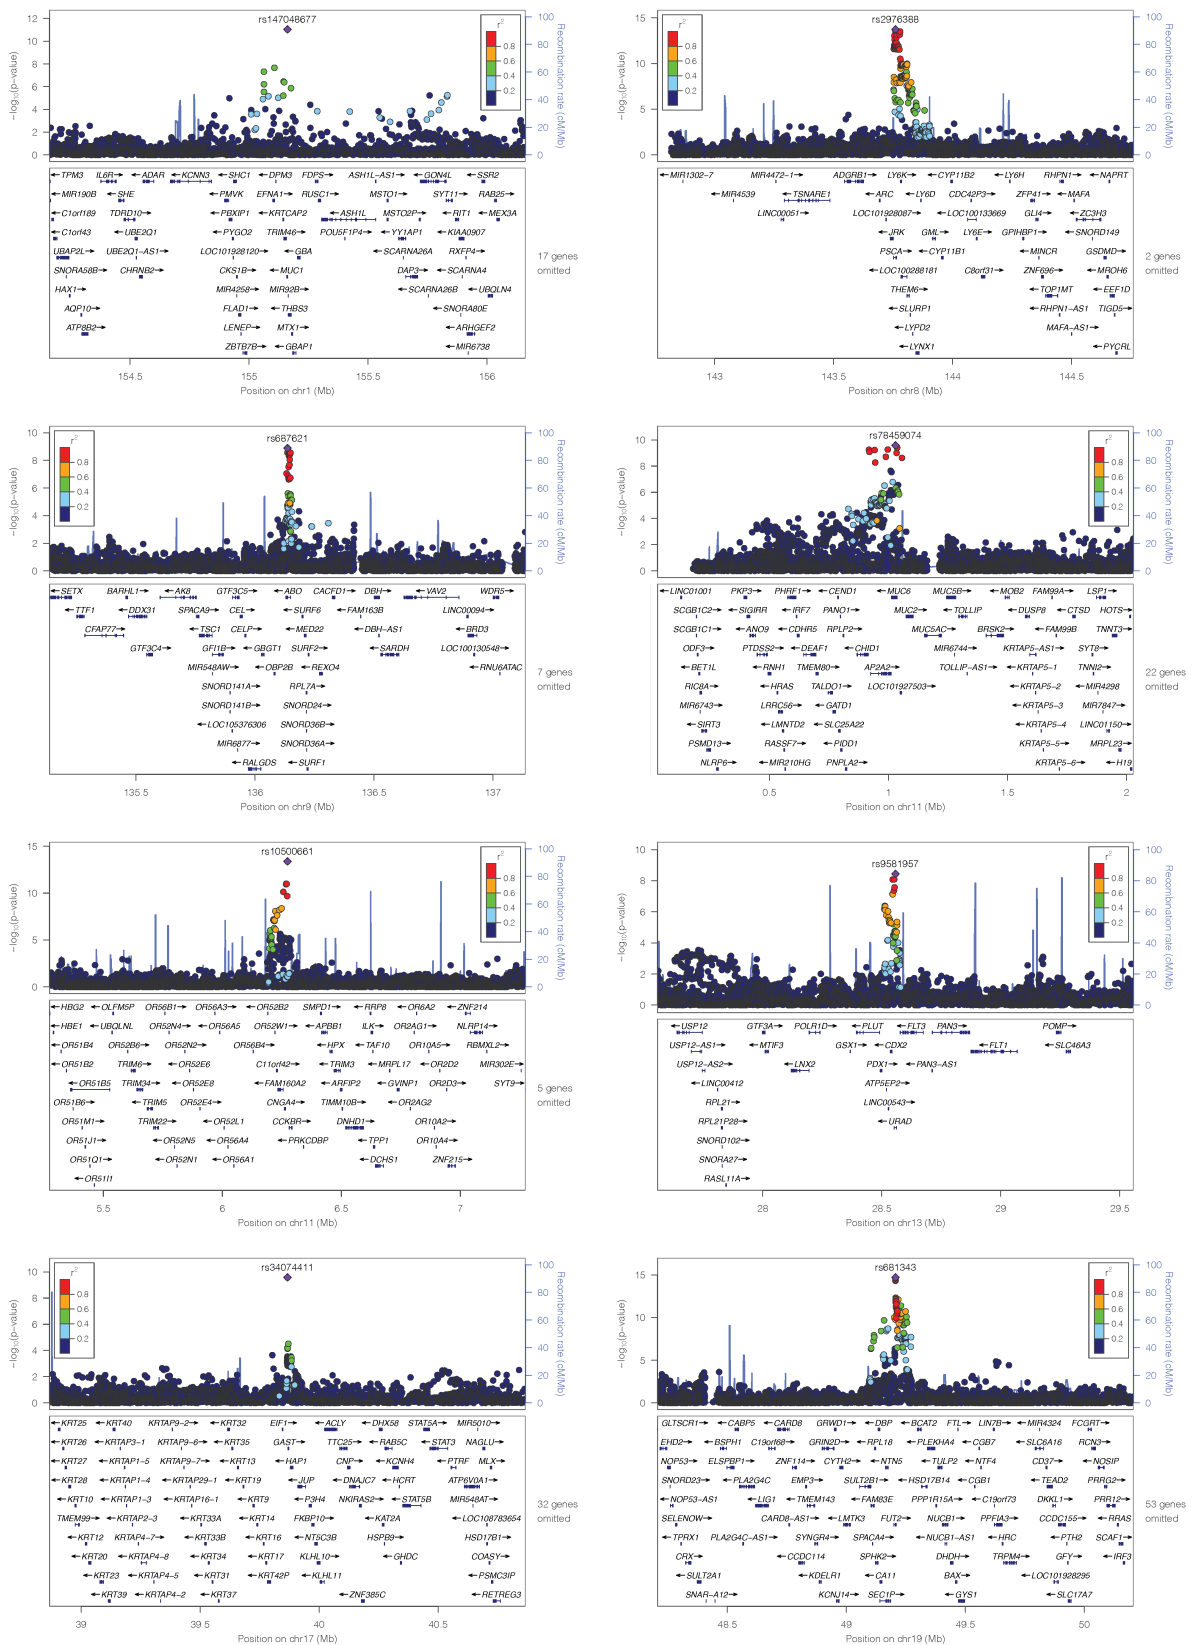

Supplementary Fig. 4. Regional association plot for peptic ulcer disease.

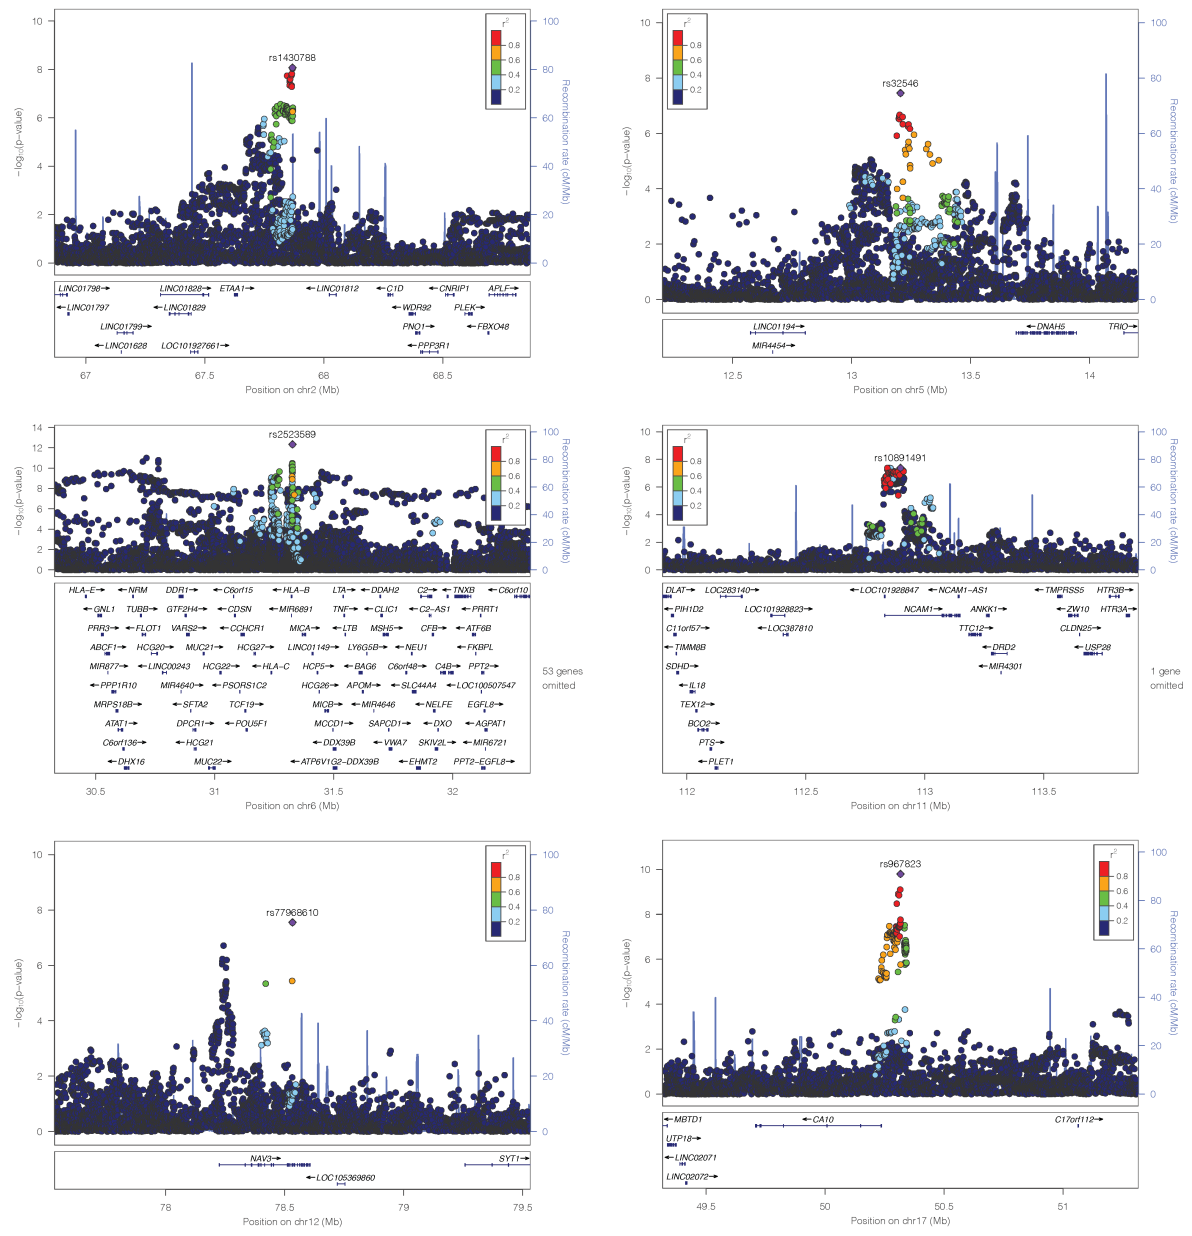

Supplementary Fig. 5. Regional association plots for gastroesophageal reflux disease.

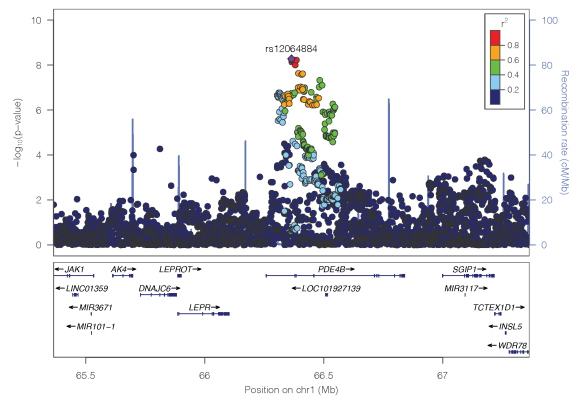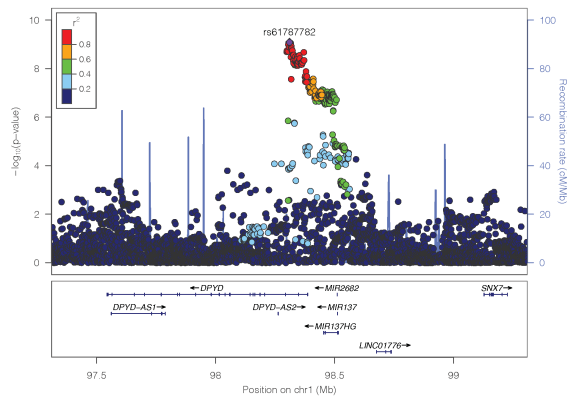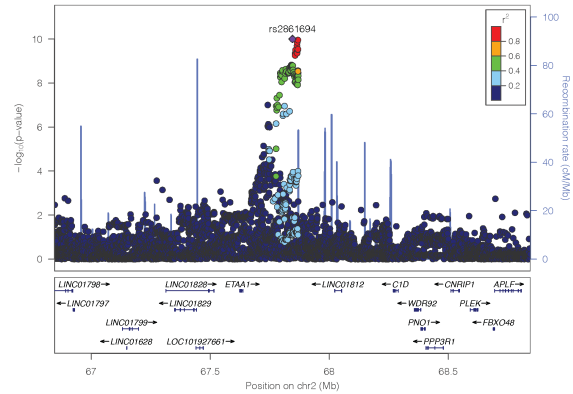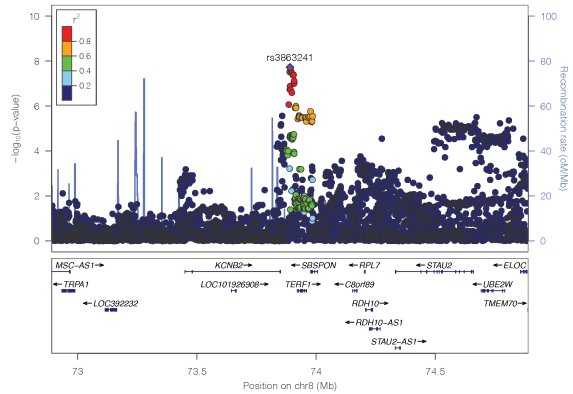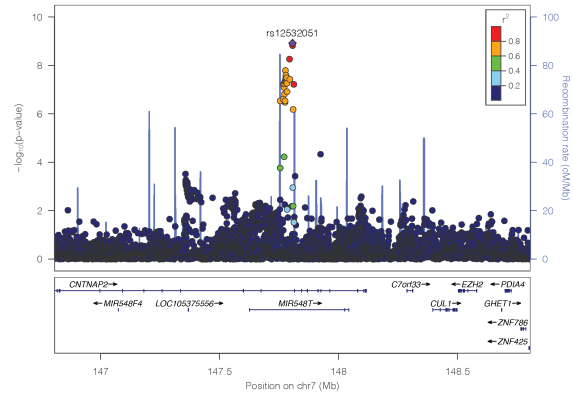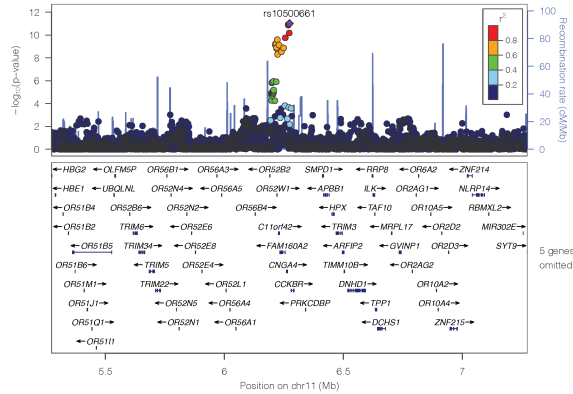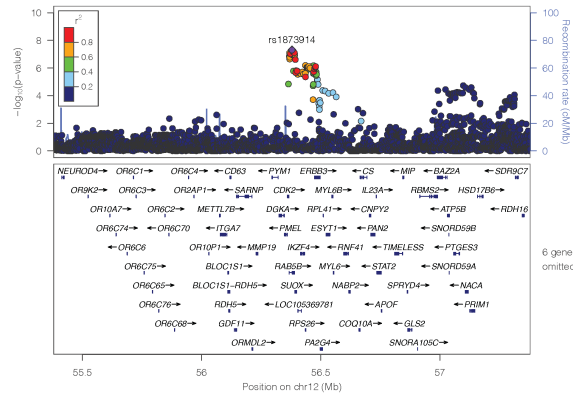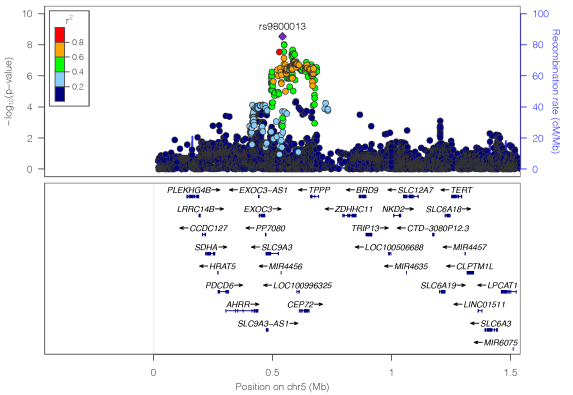

(Continued)

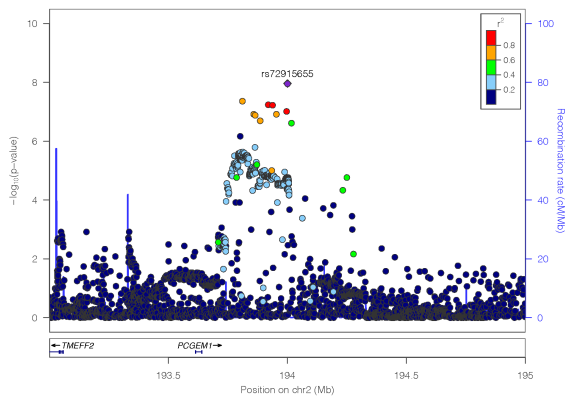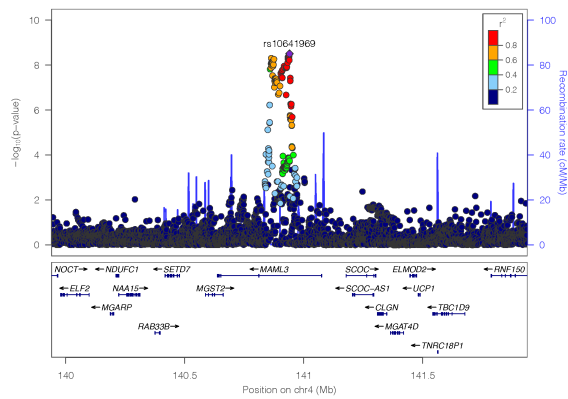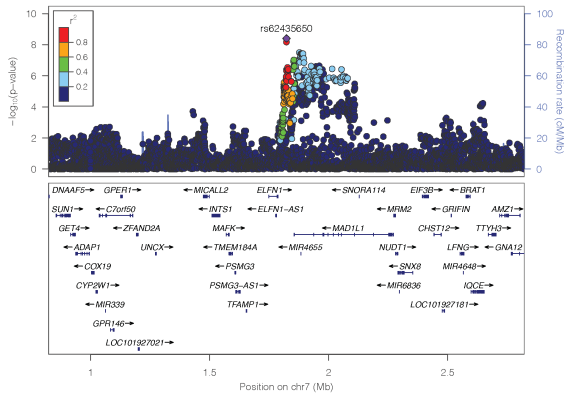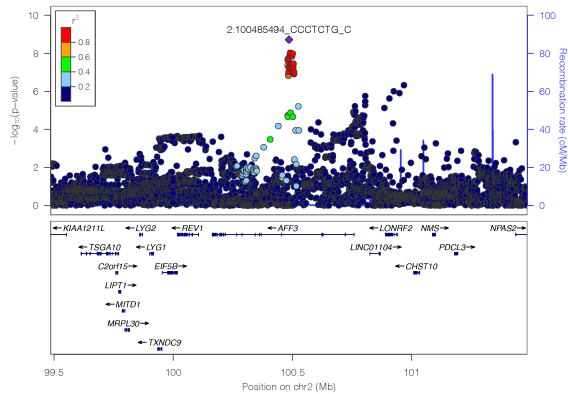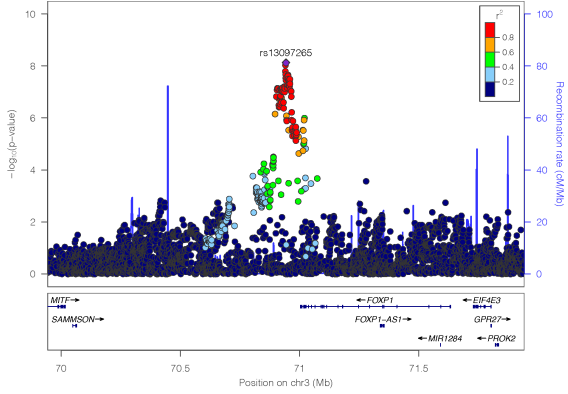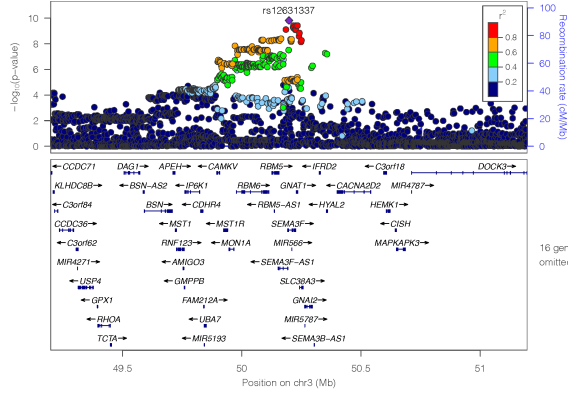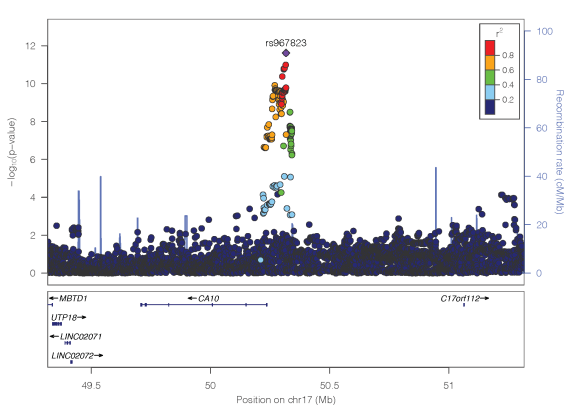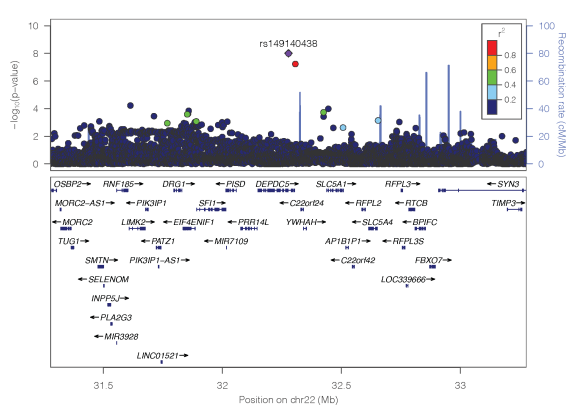

(Continued)

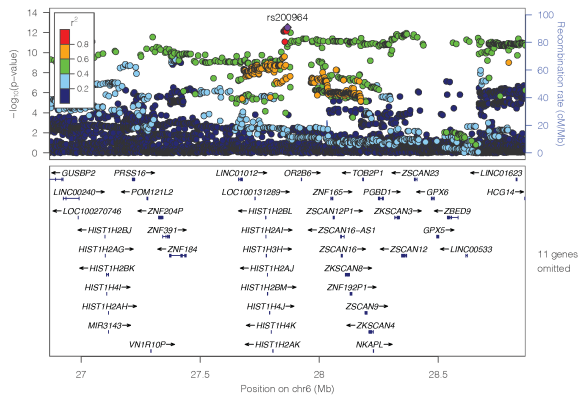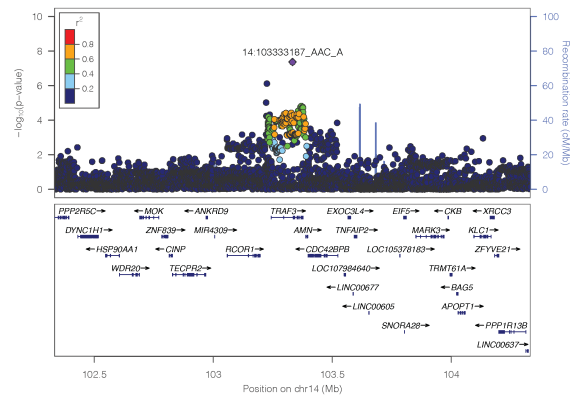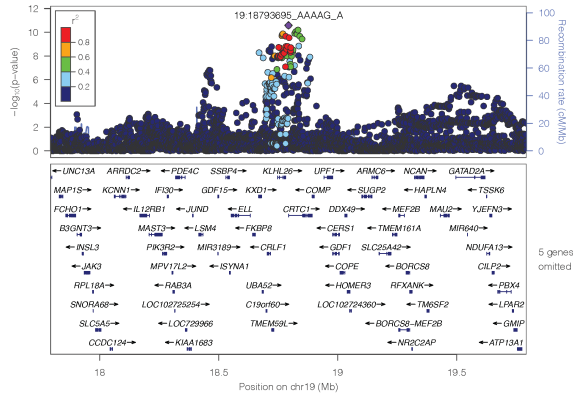

**Supplementary Fig. 6.** Regional association plots of peptic ulcer disease, gastroesophageal reflux disease and the corresponding medications .

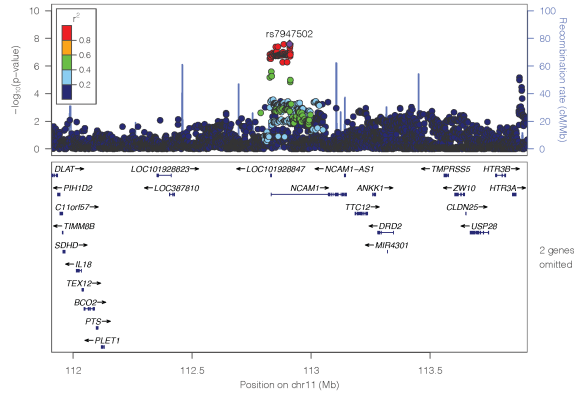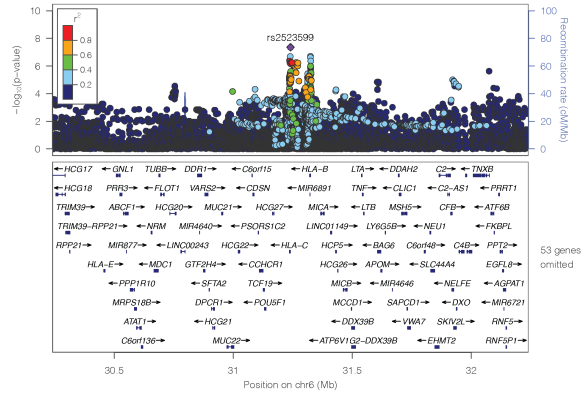

**Supplementary Fig. 7.** Regional association plot of irritable bowel syndrome.

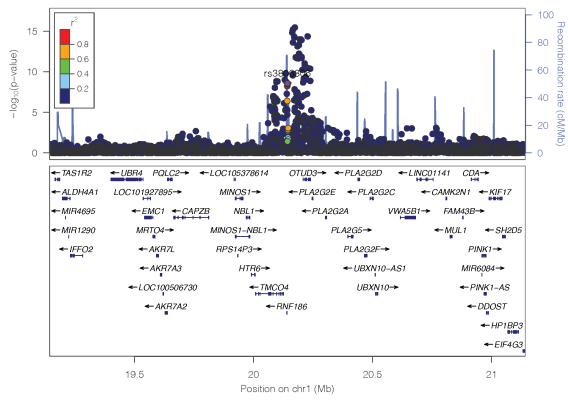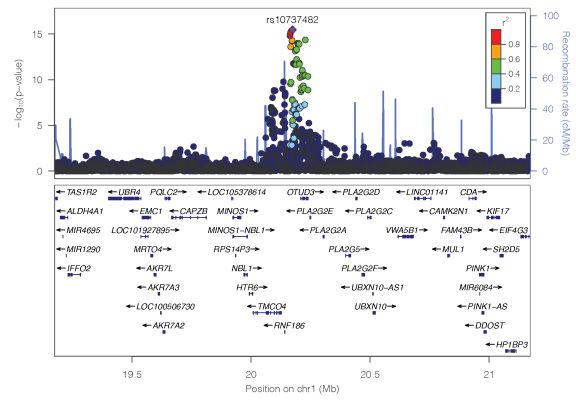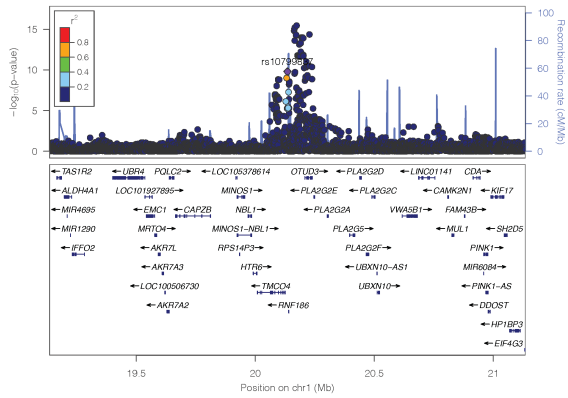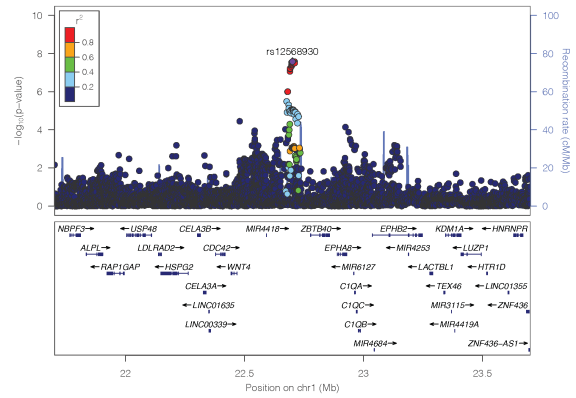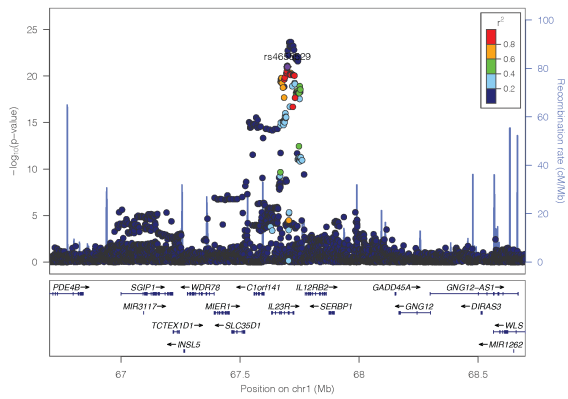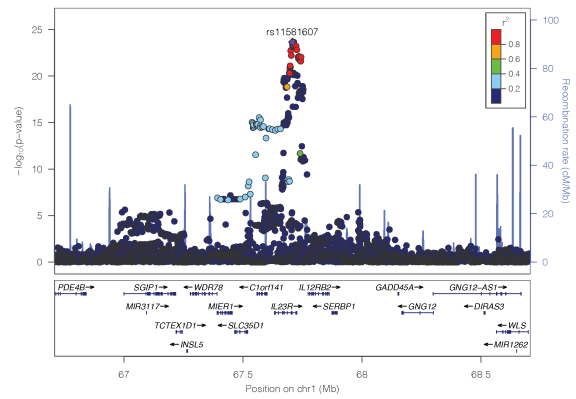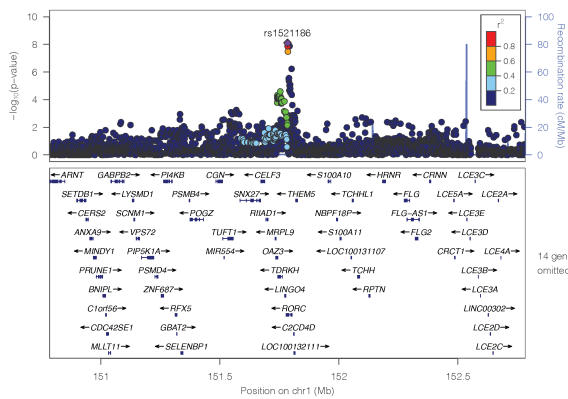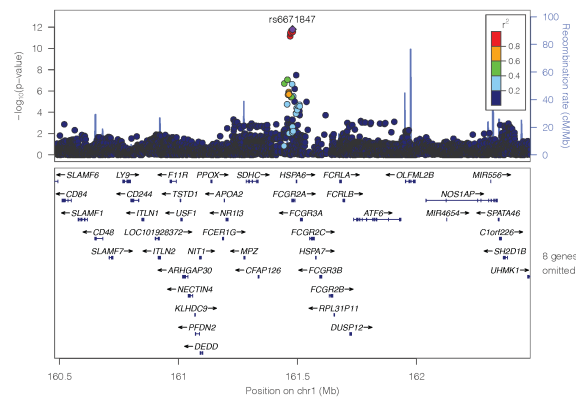

(Continued)



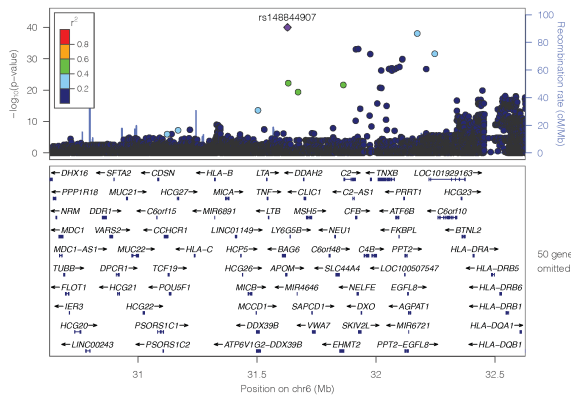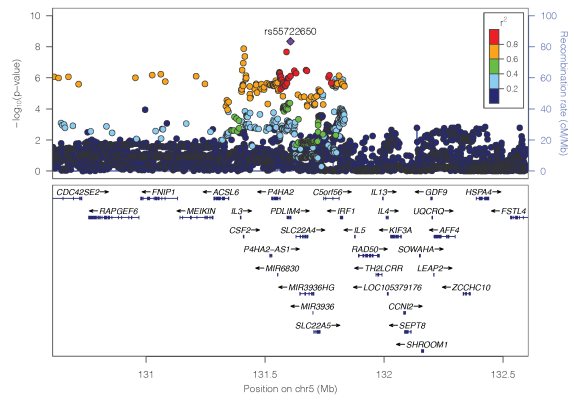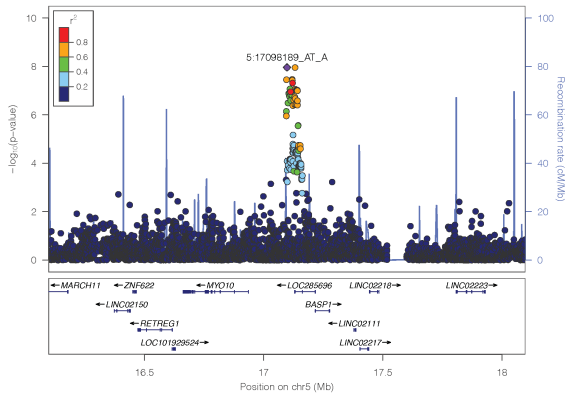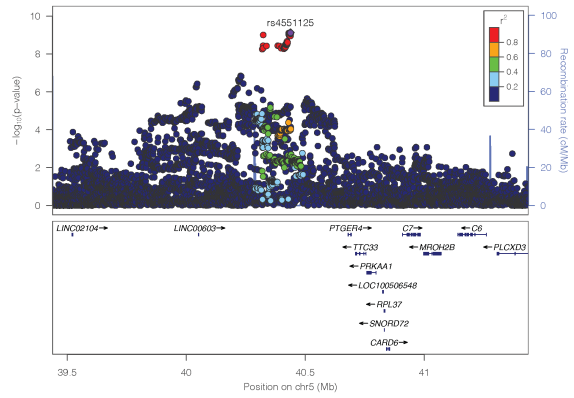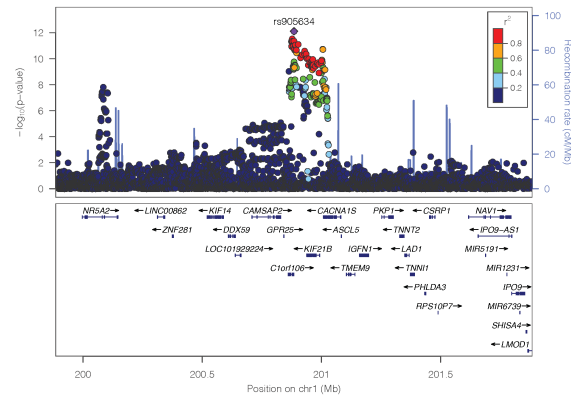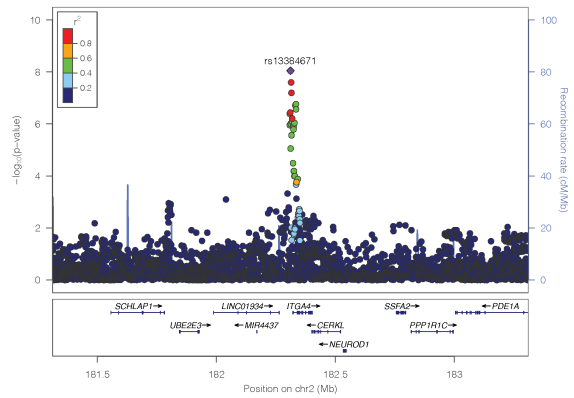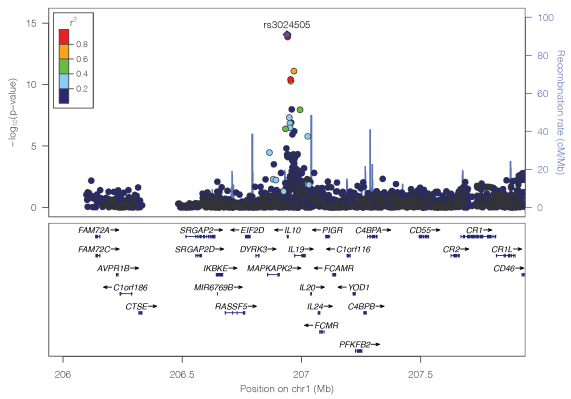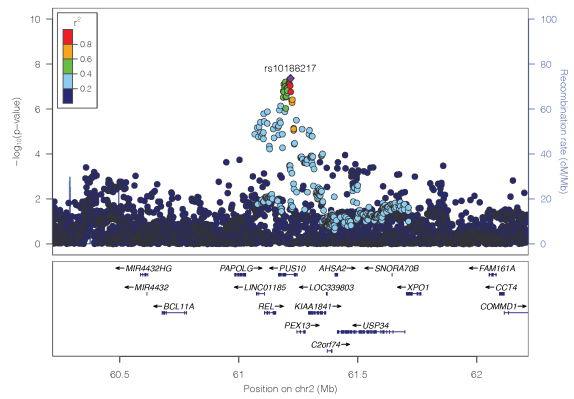

(Continued)



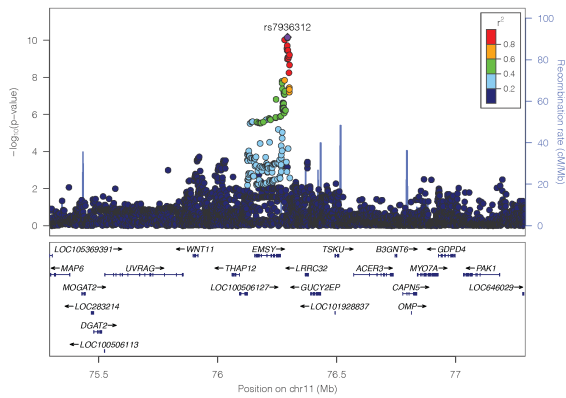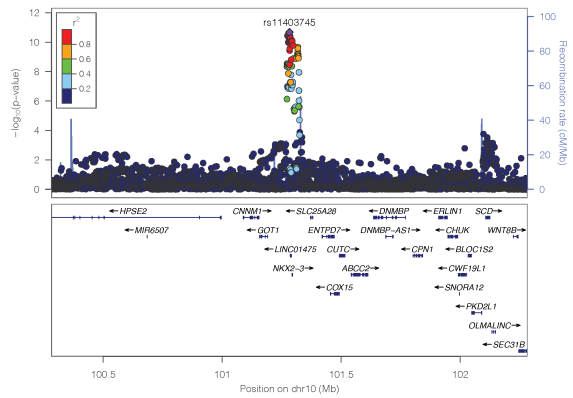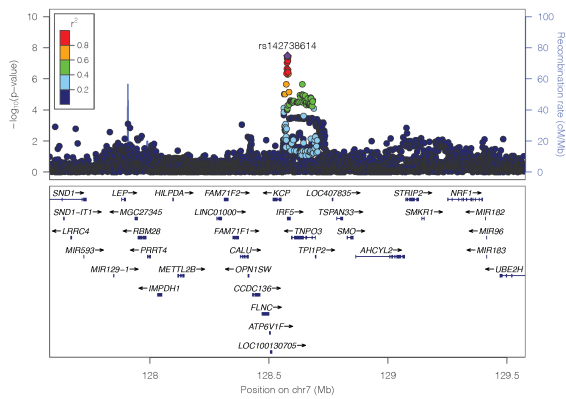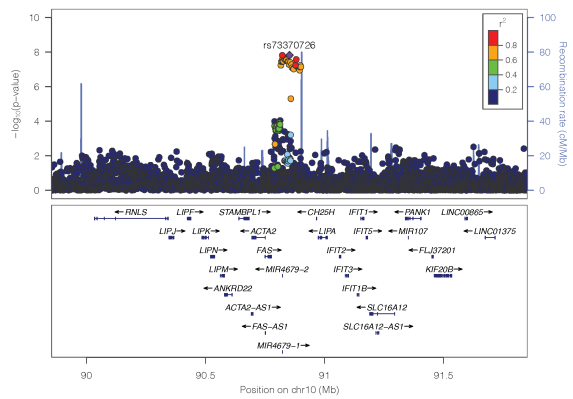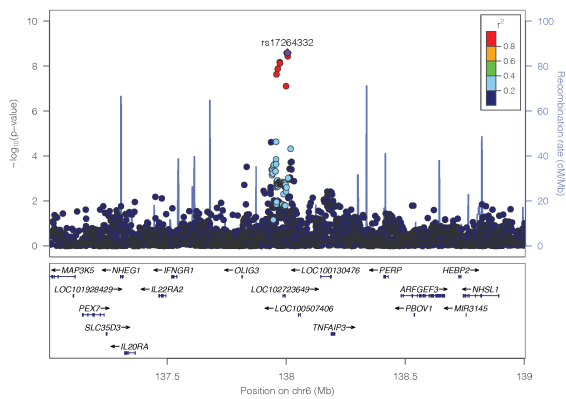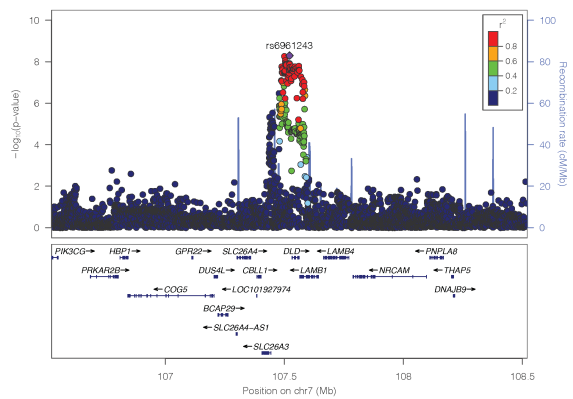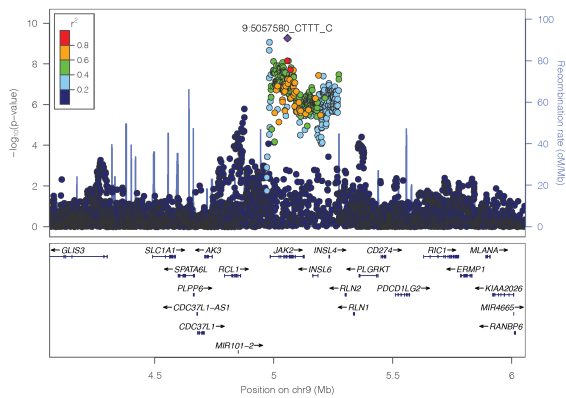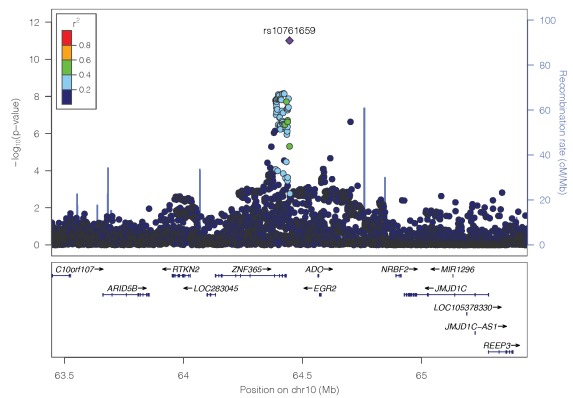

(Continued)

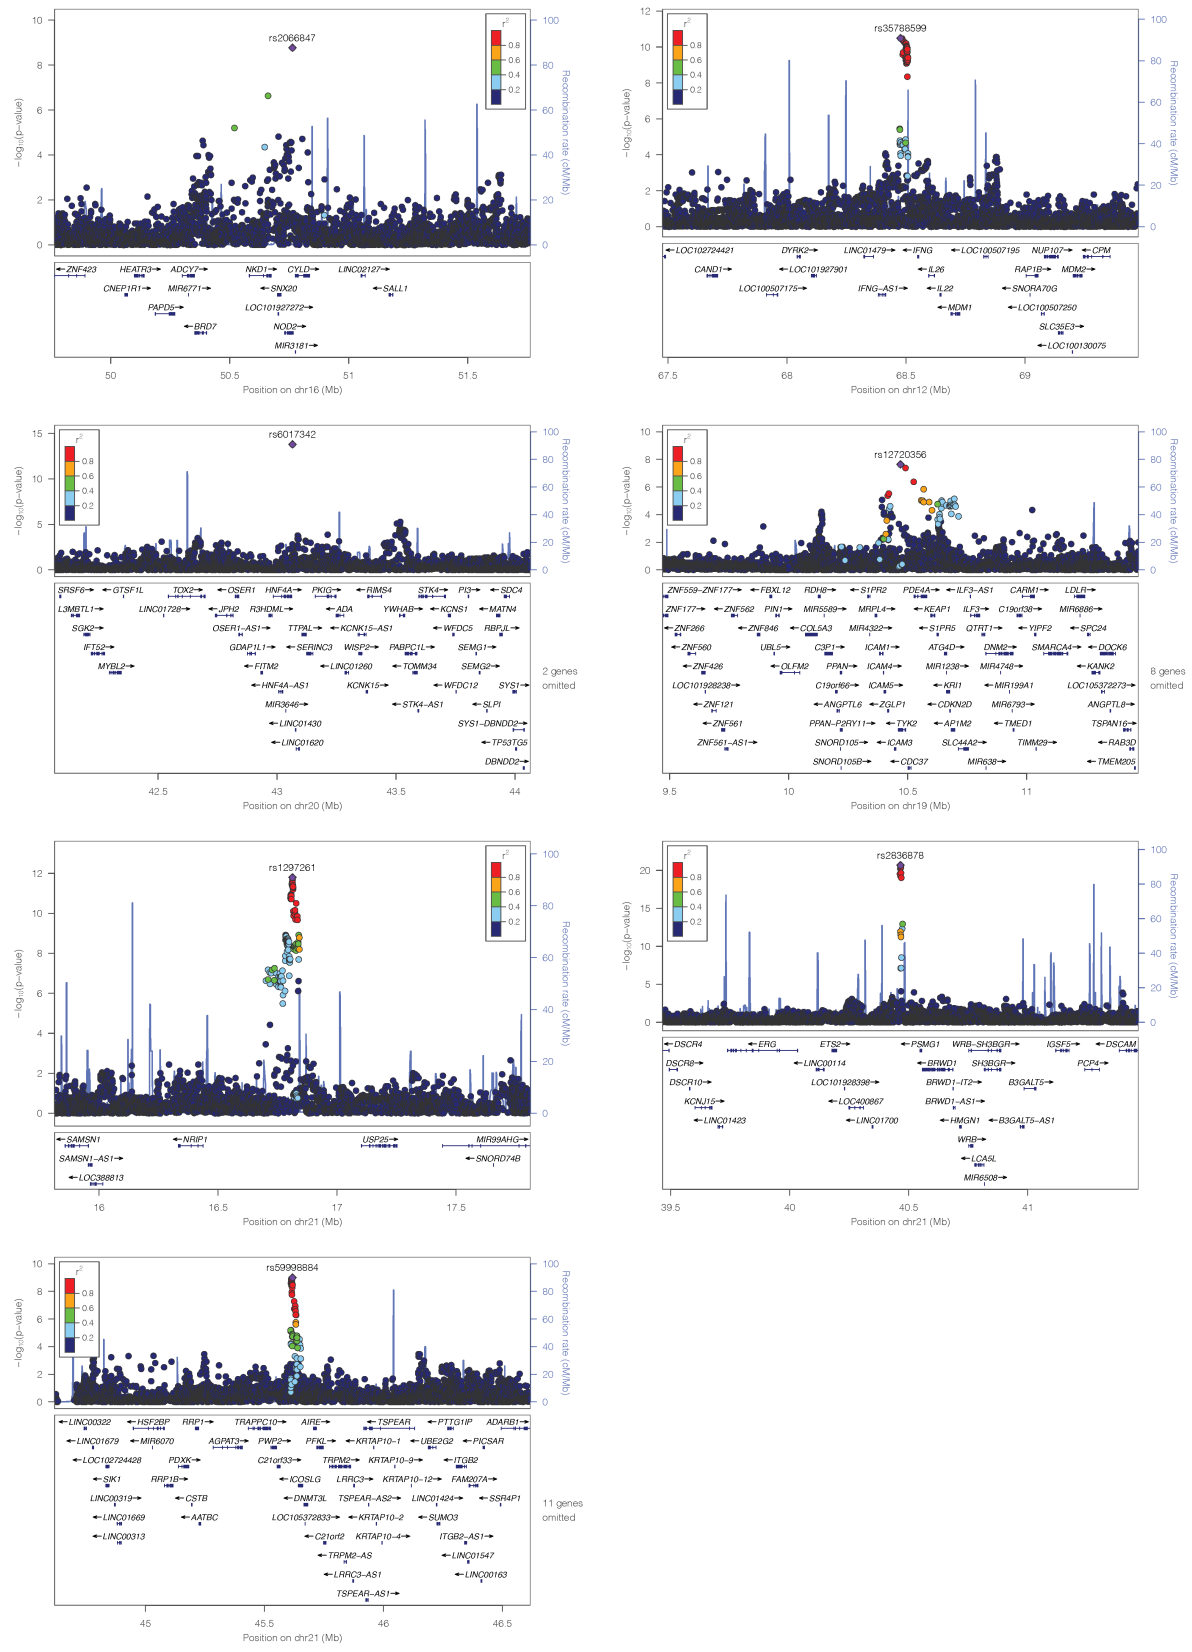

Supplementary Fig. 8. Regional association plot of inflammatory bowel diseases.

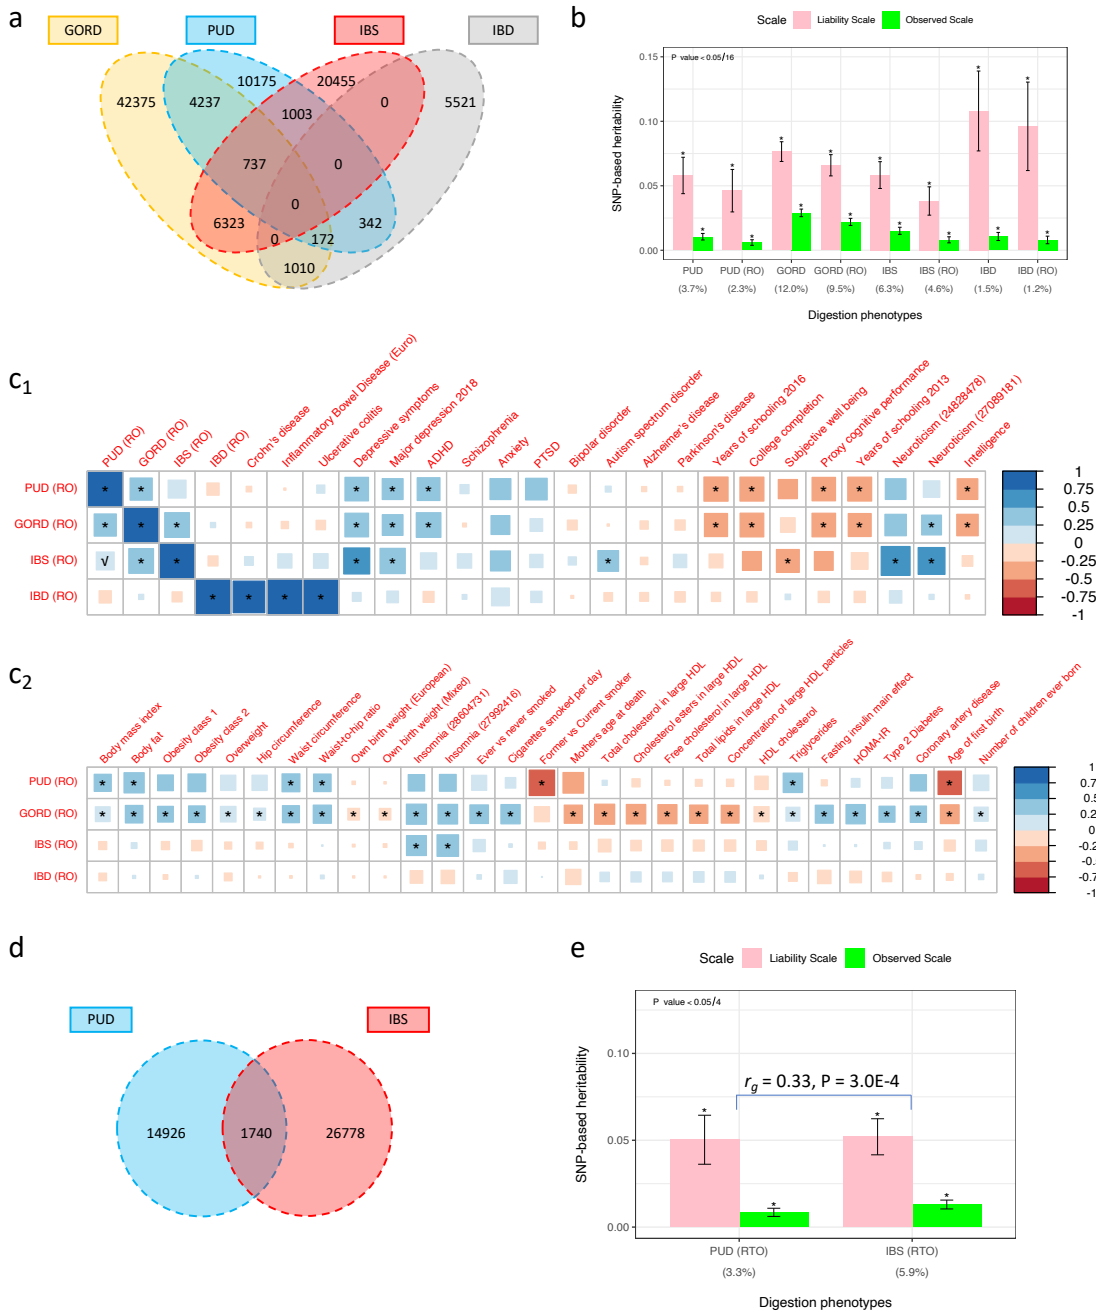

**Supplementary Fig. 9.** SNP-based heritability and genetic correlation for PUD, GORD, IBS and IBD after removing the overlapped individuals using LD score regression analyses<sup>14,15</sup>. **Panel a.** Venn diagram for the number of overlapped individuals among PUD, GORD, IBS and IBD cases. **Panel b.** Comparison of SNP-based heritability on observed and liability scale for PUD, GORD, IBS and IBD between the original phenotypes and phenotypes generated after removing individuals with more than one disorder (defined as sensitivity analysis phenotypes). “RO” represents removing overlapped individuals with more than one disorder. We took sample risk, i.e. the proportion cases for each phenotype in the UKB cohort, as the population lifetime risk to calculate the SNP-based heritability on the liability scale for each digestion phenotype; the sample risk percentage is shown below x axis. The error bars represent 95% confidence intervals for the estimated SNP-based heritability. “\*” represents that the SNP-based heritability was still significant after Bonferroni correction ( $P < 0.05/16$ ). **Panel c.** Genetic correlation between sensitivity analysis phenotypes with the original phenotypes, within sensitivity analysis phenotypes, between sensitivity analysis phenotypes with traits from LD Hub and published neuro-psychiatric disorder studies. “\*” represents that genetic correlation estimate was still significant after Bonferroni correction ( $P < 0.05/(4*4+4*258+4*9)$ ) while “v” represents the P value for genetic correlation between IBS (RO) and PUD (RO) estimates  $< 0.05$ . **Panel d.** The number of overlapped individuals between PUD and IBS cases. **Panel e.** SNP-based heritability on observed and liability scale for PUD and IBS

phenotypes generated after removing the 1740 individuals with both PUD and IBS. "RTO" represents removing the 1740 individuals with both PUD and IBS. The sample risk percentage, as shown below axis, was used as the population lifetime risk to calculate the SNP-based heritability on the liability scale. The error bars represent 95% CIs for the estimated SNP-based heritability.

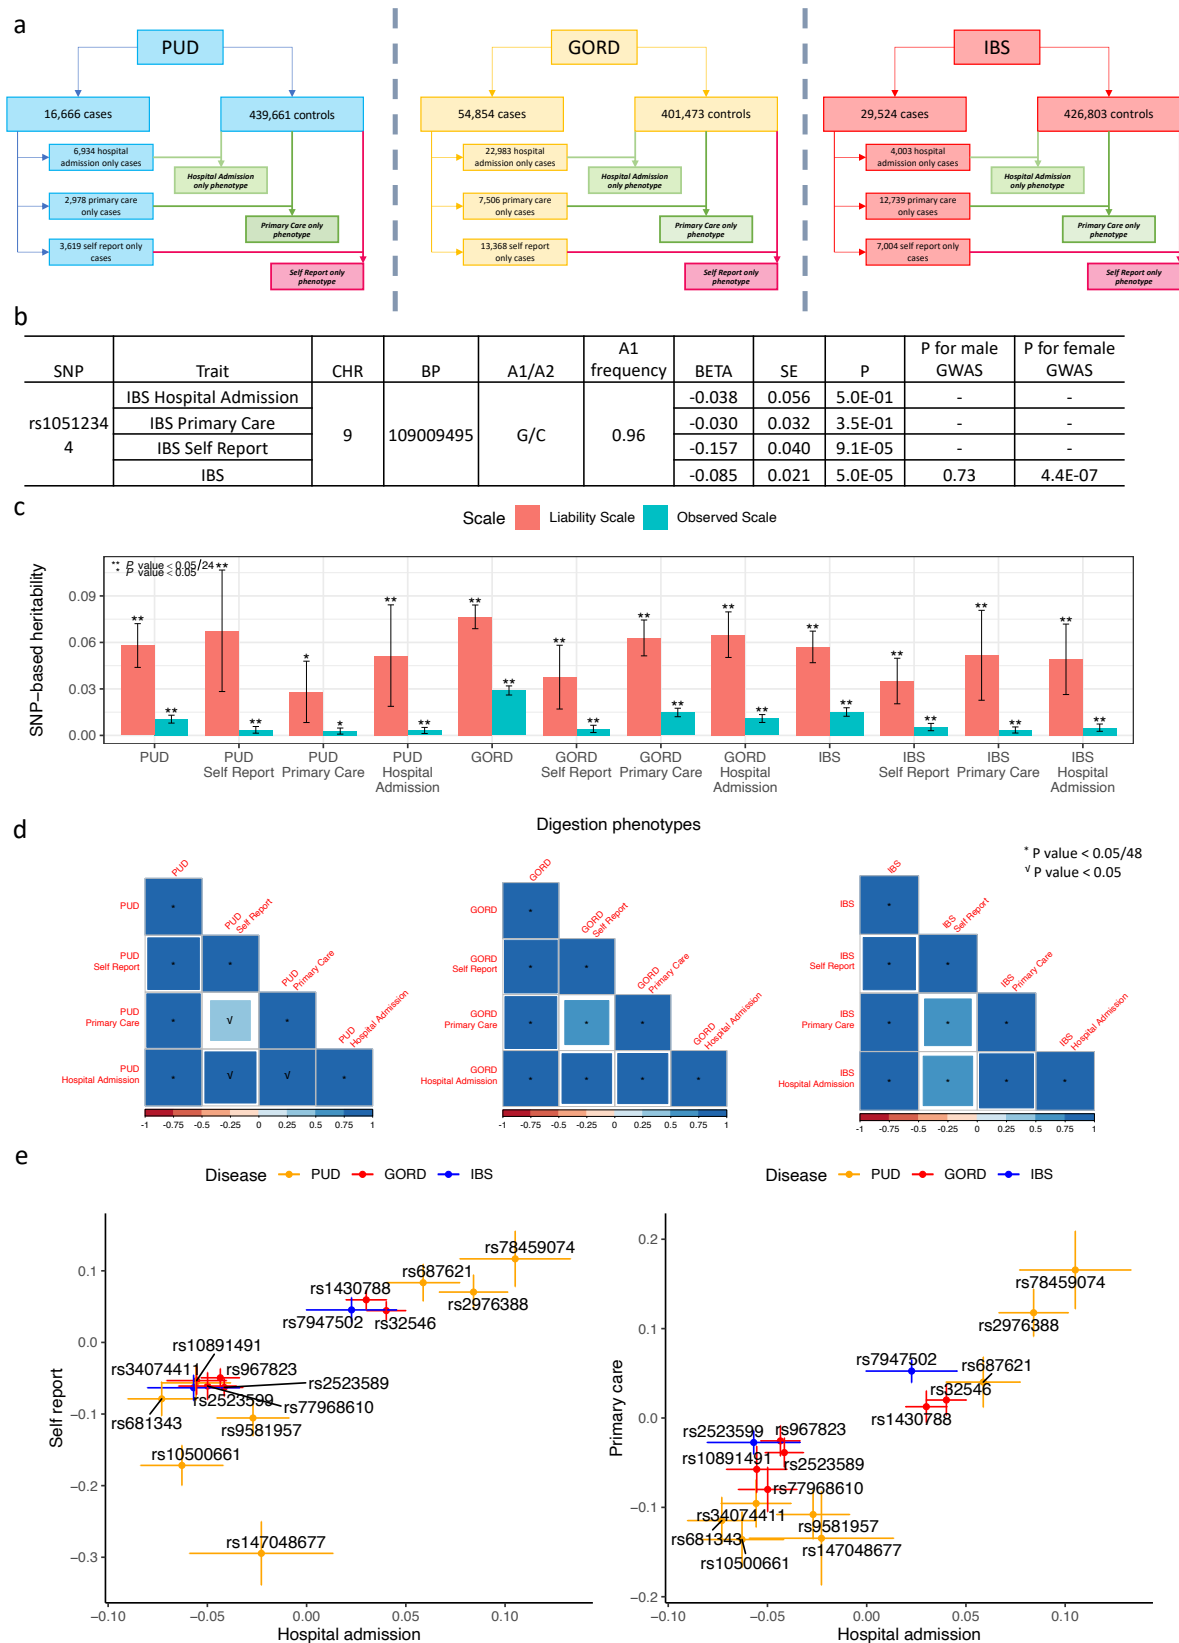

**Supplementary Fig. 10a.** The process for generation of subgroup phenotypes for each of PUD, GORD and IBS. **Supplementary Fig. 10b.** Summary statistics for rs10512344 from GWAS analyses of IBS and the three subgroup phenotypes of IBS using BOLT-LMM<sup>11</sup>. **Supplementary Fig. 10c.** SNP-based heritability estimates and 95% confidence intervals from LD score regression<sup>14</sup> for self-report, primary care and hospital admission subgroup phenotypes and the original phenotype for each of PUD, GORD and IBS. “\*” represents that the

statistical P value for the corresponding SNP-based heritability less than 0.05 and “\*\*\*” represents that the statistical P value for the corresponding SNP-based heritability less than 0.05/24 (after Bonferroni correction).

**Supplementary Fig. 10d.** Genetic correlation among self-report, primary care, hospital admission subgroup phenotypes and the original phenotype for each of PUD, GORD and IBS using bivariate LD score regression<sup>15</sup>.

**Supplementary Fig. 10e.** The effect size of genome-wide significant SNPs from broad definition of PUD, GORD and IBS in hospital admission subgroup phenotype versus those in self report subgroup phenotype and primary care subgroup phenotype, respectively. Due to the whole-part relationships for each of broadly defined phenotype and the corresponding three subgroup phenotypes, as expected, the effect size estimates for the SNPs associated with broadly defined phenotype showed high concordance in the GWAS summary statistics of the corresponding three subgroup phenotypes.

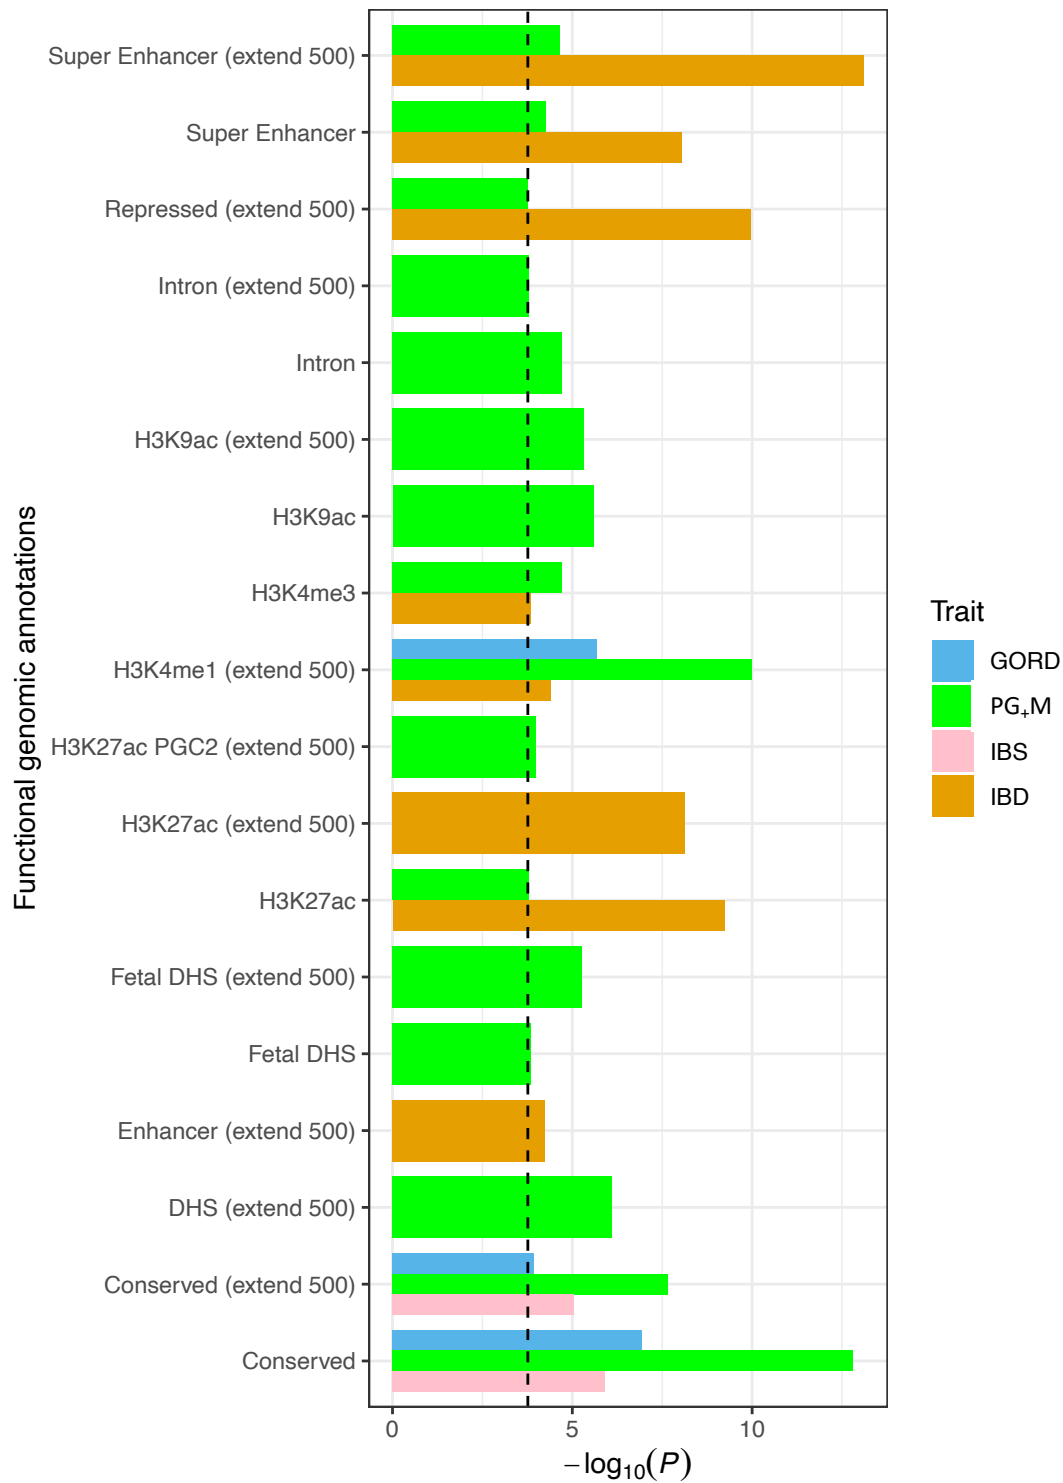

**Supplementary Fig. 11.** Significant heritability enrichment for GORD, PG<sub>+</sub>M and IBD of functional annotation based on the variants within each category after Bonferroni correction ( $P < 0.05/(53 \times 5 \times 5)$ ). The non-significant annotations are not shown.

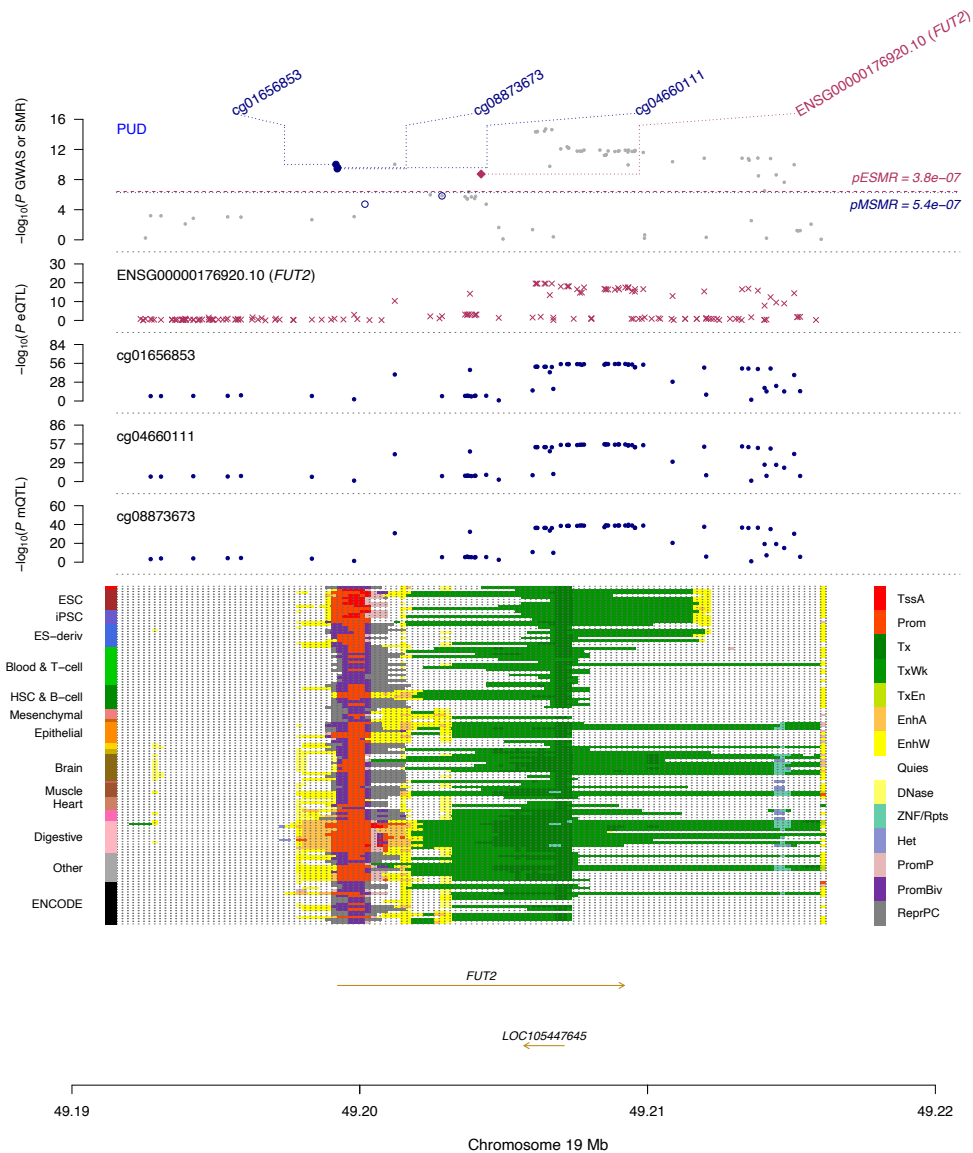

**Supplementary Fig. 12.** Results of SNP and SMR associations across mQTL, eQTL and GWAS for *FUT2* gene of PUD. The top plot of shows  $-\log_{10}(P)$  of SNPs from PUD GWAS. The red diamonds and blue circles represent  $-\log_{10}(P)$  from SMR test for associations of gene expression and DNAm probes with PUD, respectively. The solid diamonds and circles are probes not rejected by the HEIDI test. The second plot shows  $-\log_{10}(P)$  of the SNP association for gene expression *FUT2* from the stomach eQTL GTEx<sup>25</sup> data. The third plot shows  $-\log_{10}(P)$  of the SNP associations for DNA methylation probe cg01656853, cg04660111 and cg08873673 from blood mQTL data of McRae *et al.*<sup>19</sup> (there are no public digestive mQTL data at present). The bottom plot shows Roadmap epigenomics annotation (indicated by colours) for different primary cells and tissue types (rows).



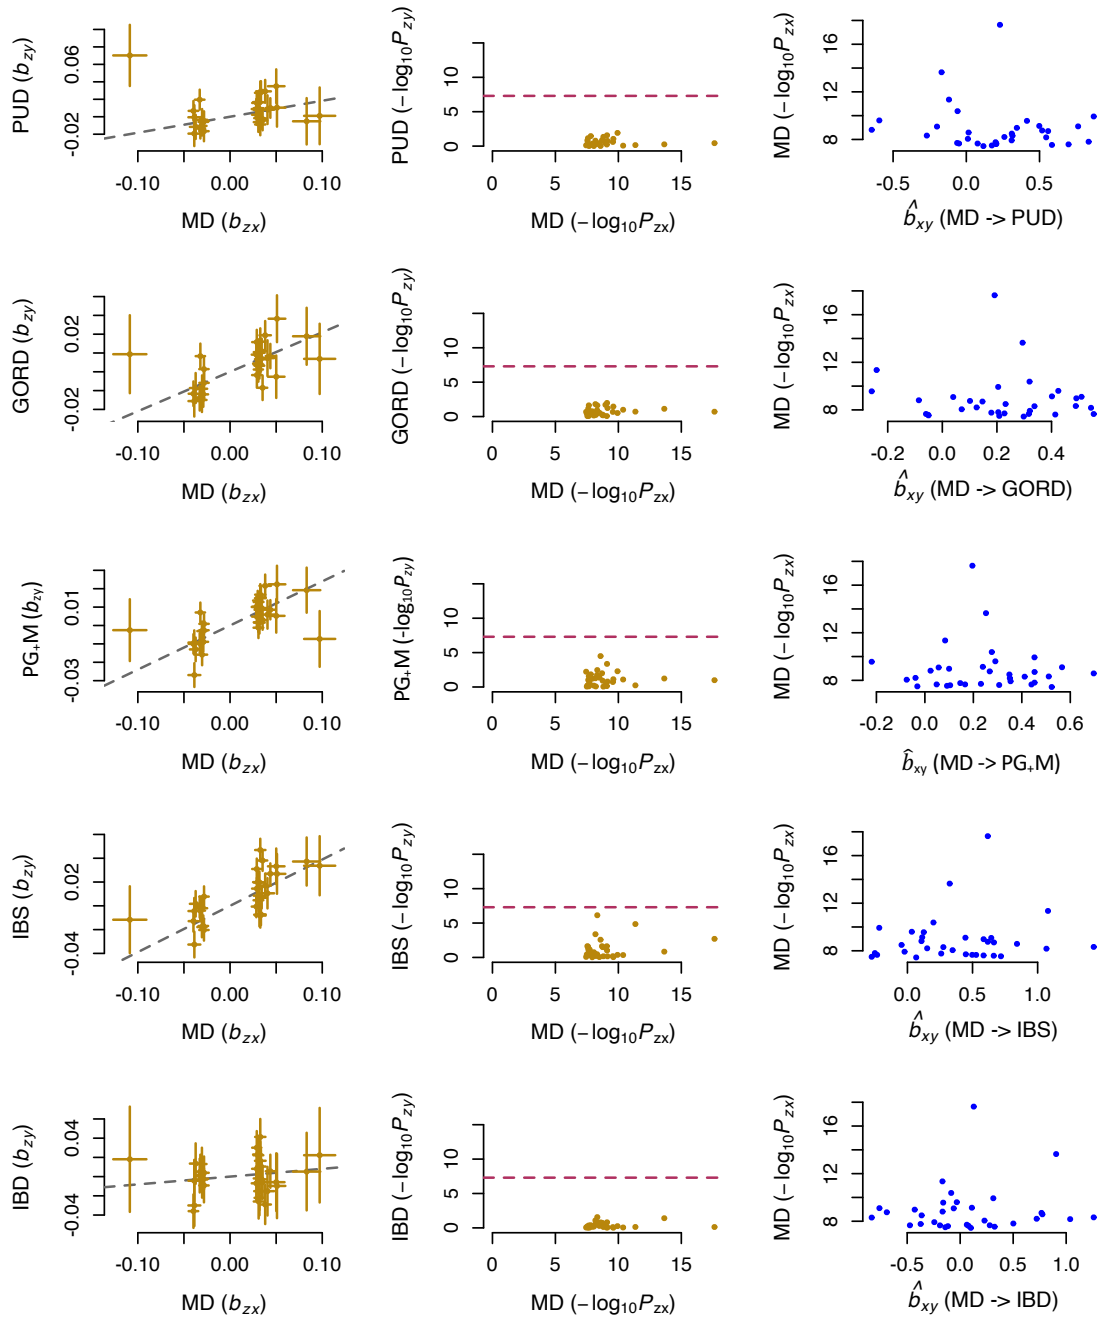

**Supplementary Fig. 13.** Plots of the effect sizes of exposure SNPs (x-axis) vs. outcome SNPs (y-axis) (first column) and association P values of all the genetic instruments from GWAS for major depression (MD) vs. those for each of the five digestion phenotypes (second column). Shown in the third column are the plots of  $b_{xy}$  vs. GWAS P value of MD at each genetic variant. All the exposure SNPs were obtained after HEIDI outlier test.

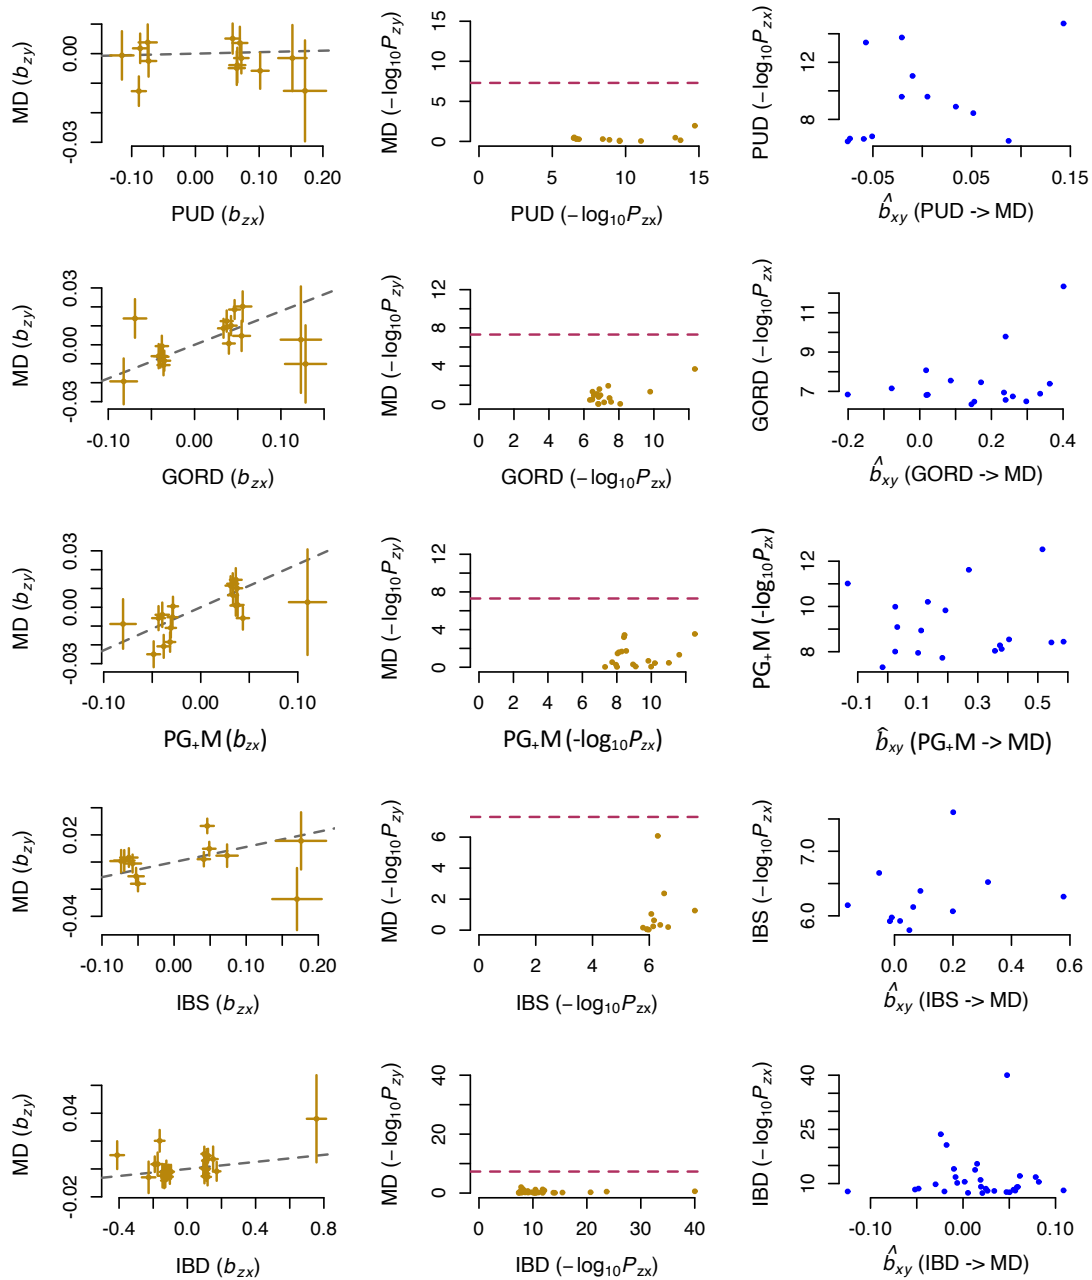

**Supplementary Fig. 14.** Plots of the effect sizes of exposure SNPs (x-axis) vs. outcome SNPs (y-axis) (first column) and association P values of all the genetic instruments from GWAS for each of the five digestion phenotypes vs. those for major depression (MD) (second column). Shown in the third column are the plots of  $\hat{b}_{xy}$  vs. GWAS P value of the five digestion phenotypes at each genetic variant. All the exposure SNPs were obtained after HEIDI outlier test. For PUD, GORD and IBS, we relaxed the significance threshold to obtain more SNP instruments.

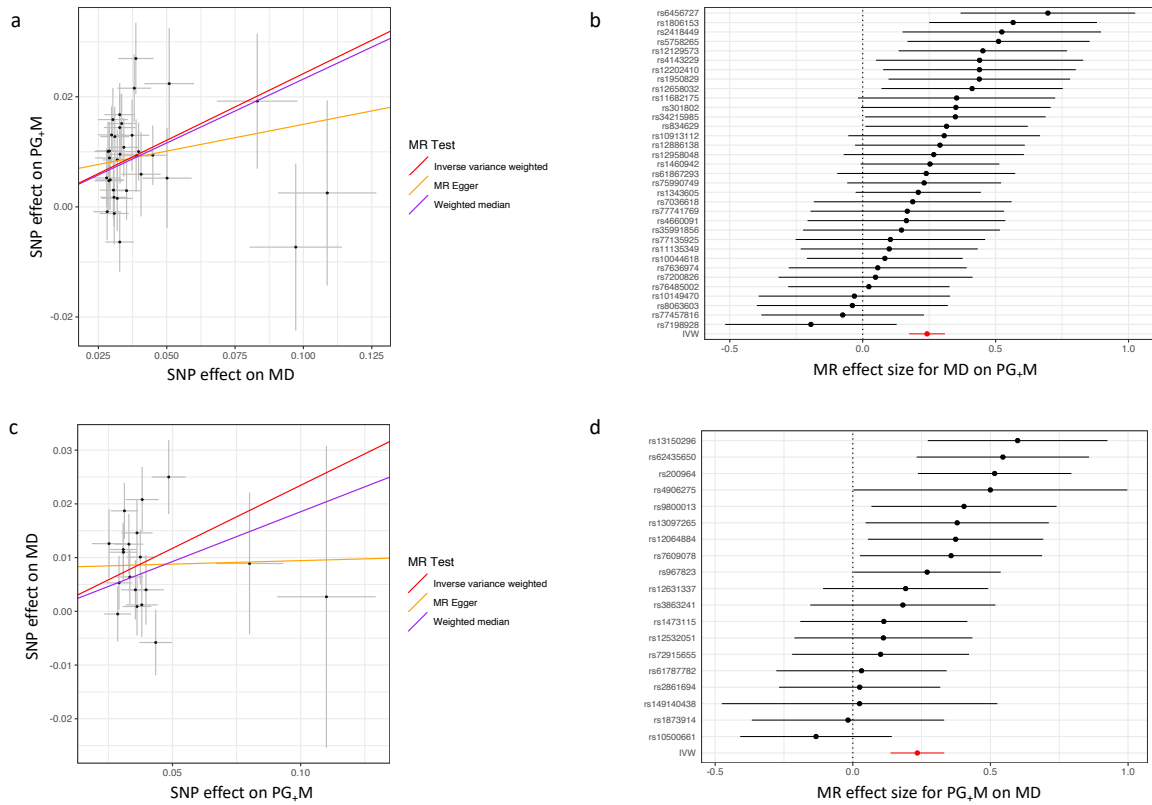

**Supplementary Fig. 15.** Mendelian Randomization (MR) plots between major depression and PG<sub>M</sub>. **Panel a.** Scatterplot of single-nucleotide polymorphism (SNP) potential effects of major depression on PG<sub>M</sub>, with the slope of each line corresponding to estimated MR effect per method. **Panel b.** Forest plot of individual and combined SNP MR-estimated effect sizes and 95% confidence intervals (CIs) of major depression on PG<sub>M</sub>. The raw effect sizes with 95% confidence interval are presented as the dot and horizontal line. **Panel c.** Scatterplot of SNP potential effects of PG<sub>M</sub> on major depression, with the slope of each line corresponding to estimated MR effect per method. **Panel d.** Forest plot of individual and combined SNP MR-estimated effect sizes and 95% CIs of PG<sub>M</sub> on major depression. The raw effect sizes with 95% confidence interval are presented as the dot and horizontal line.

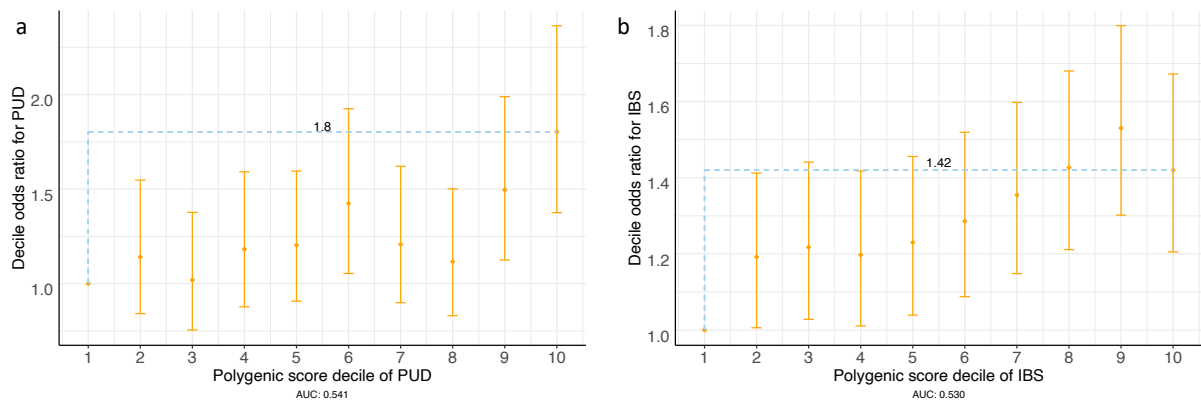

**Supplementary Fig. 16.** Polygenic score of peptic ulcer disease (PUD) and irritable bowel syndrome (IBS) predicts odds ratio (OR) for PUD (**Panel a**) and IBS (**Panel b**) respectively in individuals from GERA cohort using logistic regression model. Polygenic score of individuals from GERA cohort were calculated based on PUD associated SNPs with  $P < 5.0E-8$  and IBS associated SNPs with  $P < 0.1$  from UKB and converted to deciles (1 = lowest, 10 = highest). OR and 95% confidence intervals (CI, orange diamonds and bars) relative to decile 1 were estimated using logistic regression. The blue dashed lines in **a** represent that compared with the lowest decile, the highest decile have an OR of 1.80 for PUD. The number of PUD cases and controls from GERA cohort were 1,004 and 60,843, respectively. The P value for case-control PUD polygenic score difference from GERA cohort is  $2.5E-6$ . The blue dashed lines in **b** represent that compared with the lowest decile, the highest decile have an OR of 1.42 for IBS. The number of IBS cases and controls from GERA cohort were 3,359 and 58,488, respectively. The P value for case-control IBS polygenic score difference from GERA cohort is  $5.4E-8$ .

## References:

1. Bonfiglio, F. *et al.* Female-Specific Association Between Variants on Chromosome 9 and Self-Reported Diagnosis of Irritable Bowel Syndrome. *Gastroenterology* **155**, 168–179 (2018).
2. van Rheenen, W., Peyrot, W. J., Schork, A. J., Lee, S. H. & Wray, N. R. Genetic correlations of polygenic disease traits: from theory to practice. *Nat. Rev. Genet.* (2019). doi:10.1038/s41576-019-0137-z
3. Chang, C. C. *et al.* Second-generation PLINK: rising to the challenge of larger and richer datasets. *Gigascience* **4**, 7 (2015).
4. Burgess, S., Butterworth, A. & Thompson, S. G. Mendelian Randomization Analysis With Multiple Genetic Variants Using Summarized Data. *Genet. Epidemiol.* **37**, 658–665 (2013).
5. Bowden, J., Davey Smith, G. & Burgess, S. Mendelian randomization with invalid instruments: effect estimation and bias detection through Egger regression. *Int. J. Epidemiol.* **44**, 512–525 (2015).
6. Bowden, J., Davey Smith, G., Haycock, P. C. & Burgess, S. Consistent Estimation in Mendelian Randomization with Some Invalid Instruments Using a Weighted Median Estimator. *Genet. Epidemiol.* **40**, 304–314 (2016).
7. Verbanck, M., Chen, C.-Y., Neale, B. & Do, R. Detection of widespread horizontal pleiotropy in causal relationships inferred from Mendelian randomization between complex traits and diseases. *Nat. Genet.* **50**, 693–698 (2018).
8. O'Connor, L. J. & Price, A. L. Distinguishing genetic correlation from causation across 52 diseases and complex traits. *Nat. Genet.* **50**, 1728–1734 (2018).
9. Wu, Y. *et al.* Genome-wide association study of medication-use and associated disease in the UK Biobank. *Nat. Commun.* **10**, 1891 (2019).
10. Santos, R. *et al.* A comprehensive map of molecular drug targets. *Nat Rev Drug Discov* **16**, 19–34 (2017).
11. Loh, P.-R., Kichaev, G., Gazal, S., Schoech, A. P. & Price, A. L. Mixed-model association for biobank-scale datasets. *Nat. Genet.* **50**, 906–908 (2018).
12. MacArthur, J. *et al.* The new NHGRI-EBI Catalog of published genome-wide association studies (GWAS Catalog). *Nucleic Acids Res.* **45**, D896–D901 (2017).
13. Jiang, W. & Yu, W. Power estimation and sample size determination for replication studies of genome-wide association studies. *BMC Genomics* **17**, 19–32 (2016).
14. Bulik-Sullivan, B. K. *et al.* LD Score regression distinguishes confounding from polygenicity in genome-wide association studies. *Nat. Genet.* **47**, 291–295 (2015).
15. Bulik-Sullivan, B. *et al.* An atlas of genetic correlations across human diseases and traits. *Nat Genet* **47**, 1236–1241 (2015).
16. Finucane, H. K. *et al.* Partitioning heritability by functional annotation using genome-wide association summary statistics. *Nat. Genet.* **47**, 1228 (2015).
17. Finucane, H. K. *et al.* Heritability enrichment of specifically expressed genes identifies disease-relevant tissues and cell types. *Nat. Genet.* **50**, 621–629 (2018).
18. Zhu, Z. *et al.* Integration of summary data from GWAS and eQTL studies predicts complex trait gene targets. *Nat. Genet.* **48**, 481–487 (2016).
19. McRae, A. F. *et al.* Identification of 55,000 Replicated DNA Methylation QTL. *Sci. Rep.* **8**, 17605 (2018).
20. de Leeuw, C. A., Mooij, J. M., Heskes, T. & Posthuma, D. MAGMA: Generalized Gene-Set Analysis of GWAS Data. *PLOS Comput. Biol.* **11**, e1004219 (2015).
21. Cai, N. *et al.* Minimal phenotyping yields GWAS hits of low specificity for major depression. *bioRxiv* 440735 (2019). doi:10.1101/440735
22. Nakazawa, M. Package ‘fmsb’. <https://cran.r-project.org/web/packages/fmsb/index.html> (2019).
23. Zhu, Z. *et al.* Causal associations between risk factors and common diseases inferred from GWAS summary data. *Nat. Commun.* **9**, 224 (2018).
24. Wray, N. R. *et al.* Genome-wide association analyses identify 44 risk variants and refine the genetic architecture of major depression. *Nat Genet* **50**, 668–681 (2018).
25. GTEx Consortium. The Genotype-Tissue Expression (GTEx) pilot analysis: Multitissue gene regulation in humans. *Science (80-. )*. **348**, 648–660 (2015).
